# Supplementary material
Source: PubMed Central journal article supplement (PMC3864322)
Supplement: 1313452110_sapp.pdf [file 1313452110_sapp.pdf]

## Supplementary Information for

### **The genome of an arbuscular mycorrhizal fungus provides insights into the oldest plant symbiosis**

This PDF file includes:

Material and Methods

Table S1 to S15

Figures S1 to S19

References

## **Supporting Online Material**

### **Table of Contents**

#### **1. Materials and Methods**

- 1.1. Biological material
- 1.2. DNA extraction
- 1.3. Genome sequencing and assembly
- 1.4. Single nucleotide polymorphism (SNP) calling
- 1.5. Transposable elements, simple sequence repeats, mini-satellites and satellites
- 1.6. Gene calling and sequence analysis
- 1.7. RNA extraction, RNA-Seq, clustering, and assembly
- 1.8. Identification of large-scale genome duplications

**Figures S1 to S16**

**Tables S1 to S16**

**References**

## 1. Material and Methods

### 1.1. Biological material

*Fungal isolates and spore production.* The isolate DAOM-197198 (= DAOM-181602) of *Rhizophagus irregularis* (Błaszk, Wubet, Renker & Buscot) C. Walker & A. Schüßler comb. nov. was used for genome sequencing in this study (1,2); see (1) for the history of the DAOM-197198 isolate). As AM fungi are obligate symbionts, spores were produced in monoxenic cultures maintained on *Agrobacterium rhizogenes*-transformed roots of carrot (*Daucus carota*, clone DC2) (3). In addition to DAOM-197198, a number of genetically divergent strains of *R. irregularis* (A4, B3, C2) (4), and one strain of *R. diaphanus* (MUCL43196) have also been used. The selected strains (A4, B3, C2) have been selected to assess genome polymorphism (C2, MUCL43196) and/or potential MAT gene ‘idiomorphs’ (A4, B3, C2) for the following reasons: (i) *in vitro* fungal cultures with transformed carrot roots are available, allowing the isolation of sufficient amount of DNA to perform PCR that are free of any obvious contaminants ; (ii) They represent different members of a single population of *R. irregularis* isolated in Taenikon, Switzerland (4); (iii) They are genetically different from each other, and are able to undergo anastomoses; and may thus be able of undergoing a parasexual life cycle (i.e. nuclear exchange); and (iv) Genome sequencing is on-going on these strains for further analyses. These isolates were cultivated within *in vitro* split-plates during eight weeks to produce ~8,000,000 pure spores (multisporal & multinucleate material) as previously described (4).

*Time-course of spore germination.* For the transcript profiling of germinating spores carried out by Illumina RNA sequencing (RNA-Seq), 80,000 to 125,000 sterile spores of *R. irregularis* DAOM-197198 (Agronutrition, Labège, France) were germinated in sterile liquid M medium. Spores were germinated in the dark at 30°C in 2% CO<sub>2</sub>. After 2 and 9 days of germination, the spores were removed by filtration, immediately frozen in liquid nitrogen and crushed with a pestle and mortar for further RNA extraction.

*R. irregularis gene expression in Medicago truncatula.* To increase the mycorrhizal colonization of *M. truncatula* roots, a nursery system was used as follows. Leek seeds (*Allium porrum* cv. Elboeuf) were germinated on vermiculite for two weeks and then transferred to 4 L pots with sterile charred clay (Oil-Dri, Klasmann, France) as substrate, mixed with 400 spores of *R. irregularis* per L. Leek plants were grown for 3 months at 25°C/22°C under a long day photoperiod (16h light/8h dark at 25°C/22°C) with 80% humidity. Seeds of *M. truncatula* ecotype A17 were surface sterilized with 3.2% sodium hypochlorite for 10 min, 95% ethanol for

2 min, and washed four times with sterile distilled water. Seeds were germinated on 1% water-agar for 5 days at 4°C in the dark. Germinated seedlings were transferred to pots containing 3-month-old mycorrhizal leeks (6 plantlets per pot) and grown under a long day photoperiod (16h light/8h dark at 22°C/20°C) with 40% humidity. To avoid any changes in gene expression related to the nursery growth system (e.g., nutrient and signal exchanges between plants via the fungal networks), plantlets were removed from the leek-nursery pot after three weeks and transferred into a 250-ml pot with sterile charred clay as substrate. After two weeks (22/20°C, 70% humidity under a long day photoperiod), *M. truncatula* roots were collected, thoroughly washed to remove the substrate, and frozen in liquid nitrogen. Random fragments of the mycorrhizal roots were isolated to estimate the colonization level (5). Colonization levels ranged between 65% and 68%. All plants were watered daily with half-strength Long Ashton Nutrient Solution (6) containing a final concentration of 7.5 µM P.

## 1.2. DNA extraction

For 454 pyrosequencing, high-molecular weight (HMW) genomic DNA (gDNA) was extracted from 1,000,000 sterile spores of *R. irregularis* DAOM-197198 (commercial inoculant Mycorhise® ASP; Premier Tech Biotechnologies, Rivière-Du-Loup, QC, CA) in a liquid suspension of 4,000 spores per mL. This suspension was filtered on a sterile plastic 35µm sieve. Under a binocular microscope, spores were checked for root contamination and root fragments were removed with forceps. Spores were then gently crushed in a 1.5 ml plastic microtube using a sterilized pestle at 4°C. DNA was extracted using DNeasy Plant Mini kit (Qiagen) at the Tree-Microbe Interactions Department at INRA-Nancy, according to manufacturer's instructions.

For Illumina genome sequencing, HMW DNA was prepared by the Laboratoire de Recherche en Sciences Végétales (LRSV, Toulouse, France) from 18,000,000 pure sterile spores of DAOM-197198 produced by Agronutrition (Labège, France) as described in section 1.1. Spores were gently crushed without freezing and DNA was extracted using a modified cetyltrimethylammonium bromide (CTAB) method (7). About 20 µg DNA was subsequently analyzed for quality via pulsed field gel electrophoresis using a BioRad CHEF Mapper system (Bio-Rad Laboratories, Hercules, California).

## 1.3. Genome Sequencing & Assembly

*Sanger sequencing.* Fosmids were sequenced using Sanger sequencing on ABI 3730XL capillary machines at the U.S. Department of Energy Joint Genome Institute (JGI). All general aspects of library construction and sequencing can be found at the JGI website

<http://www.jgi.doe.gov/> and GenBank (accession n° AUPC00000000, BioProject: PRJNA208392).

*454 pyrosequencing.* HMW gDNA was sequenced at the Genome Quebec Innovation Centre (McGill University, Montreal) and at Beckman Genomics facilities (Danvers, MA, USA) by GS FLX Titanium (Roche 454 Life Science).

*Illumina sequencing.* HMW gDNA was high-molecular-weight DNA was used to generate libraries for Illumina Sequence by Synthesis (Illumina-SBS) genome sequencing using the standard Illumina TruSeq DNA protocol ([http://genome.med.harvard.edu/documents/illumina/TruSeq\\_DNA\\_SamplePrep\\_Guide\\_15005180\\_A.pdf](http://genome.med.harvard.edu/documents/illumina/TruSeq_DNA_SamplePrep_Guide_15005180_A.pdf)). Illumina sequencing was conducted using the services of a commercial provider (GATC Biotech AG, Konstanz, Germany) on a HiSeq 2000 sequencing platform. Illumina sequencing yielded 37,094,828 single end reads of 100 bp length.

*PacBio sequencing.* One single-molecule real-time (SMRT) cell library was prepared with PacBio C2 DNA preparation kit 2.0 (3-10 kb, Pacific Biosciences cat#001 - 540 - 835), using 3.5 µg of a purified DAOM-197198 HMW gDNA. The polymerase was bound to the library with the DNA/Polymerase Binding Kit XL 1.0 (Pacific Biosciences cat# 100-150-800). Subsequently, the library was sequenced on the PacBio RS using nine SMRT cells (version 2 cat#001-350-385) and C2 DNA Sequencing Kit 2.0 (cat #001-554-002) at the Lausanne University Genomic Technologies Facility. A one hundred and twenty minute length movie was taken for each SMRTcell. Sequencing yielded 766 Mb of quality-filtered data in 139,080 raw long reads, with an average length of 3 kb (maximum length: 22 kb). The read sequences represented a genome coverage of ~5X.

*Genome assembly.* All computational genome assemblies were conducted using an Apple Power Mac server (2 x 2.93 GHz 6-core Intel Xeon with 64 Go DDR3 RAM). Before genome assembly, the sequences were filtered for adapter sequences, low quality reads and bacterial and fungal contaminants (**Fig. S1**). Sequences with a GC%>45 were considered as contaminants and discarded (**Fig. S20**). We then used the CLC Genomic Workbench program v6.0 for the genome hybrid assembly using 30,067,076 filtered reads (3,78 Gb). Parameters were as followed: automatic word size; bubble size, 50; deletion cost, 3; insertion cost, 3; length fraction, 0.5; mapping mode, map reads back to contigs; minimum contig length, 1,000; mismatch cost, 2; similarity fraction, 0.8. This genome hybrid assembly, so-called Gloin1, resulted in 28,371 scaffolds, ranging in size from 1,000 to 57,883 nucleotides (N50 length of 4.19 kb). Due to the

high proportion of repetitive DNA, a substantial part of the whole-genome shotgun reads collapsed into relatively small contigs characterized by exceptionally high read depths (>2,000-fold) (**Fig. S2**).

We sought to improve the assembly by using a hybrid SMRT-Illumina strategy. The Gloin1 hybrid assembly was combined with PacBio data using the PacBio AHA (A Hybrid Assembler) scaffolding algorithm to produce the assembly PacBio-Gloin1. This resulted in a ~101 million base-pair (Mb) genome assembly (N50 length of 15.16 kb). This assembly indicated that the DAOM-197198 genome is rich in AT bases (A + T content 72%) (**Fig. 2**). Each scaffold was screened against bacterial proteins, organelle sequences and GenBank using megablast against Genbank NR and BLASTP against a set of known microbial proteins. Bacterial sequences were discarded (**Fig. S20**). Additional scaffolds were identified as unanchored ribosomal DNA, mitochondrial DNA, and repetitive elements. Scaffolds <1 kbp were removed. The genome sequences have been deposited in the GenBank database (accession n° AUPC00000000, BioProject: PRJNA208392) and are available at the *Rhizophagus* JGI portal at <http://jgi.doe.gov/Glomus/>.

To estimate the size of the *R. irregularis* genome, we first estimated the real sequencing depth based on *k*-mer (17-mer) frequency distribution in the Illumina sequencing reads as described (11) (**Fig. S6**). The peak of 17-mer frequency (*M*) in reads is correlated with the real sequencing depth (*N*), read length (*L*), and *k*-mer length (*K*), their relations can be expressed as  $M = N * (L - K + 1) / L$ . Then, we divided the total Illumina sequence length (2,741Mb) by the real sequencing depth (17.85x) and obtained an estimated genome size of 153 Mb.

The sequences with a GC%>45% were assembled using CLC Genomic Workbench v6.0 yielding 13,365 scaffolds; 90.5 % of them showed a BLASTN hit against bacterial genomes in the NCBI nr database. The most abundant bacterial sequences belonged to *Pseudomonas denitrificans* (19.3%), *Pseudomonas putida* (17.5%), *Klebsiella oxytoca* (16.4%) and *Enterobacter cloacae* (12.4%).

#### **1.4. Single nucleotide polymorphisms (SNP) calling**

Illumina genomic reads from *R. irregularis* DAOM-197198 and RNA-Seq reads from *R. irregularis* DAOM-197198, *R. irregularis* C2 and *R. diaphanum* were mapped to the *R. irregularis* Gloin1 assembly using the Burrows-Wheeler Aligner (BWA) software package (9) with the default settings. SNP calling was performed separately for the Illumina genome and transcriptome sequencing reads using the functions *mpileup* and *bcftools* of SAMtools v0.1.18 (10), with options -bvcg. The obtained SNP positions were filtered to remove homozygous positions, SNP quality <20 or mapping quality < 20 and SNP within 3 bp around a gap. Finally,

to remove potential artifactual SNPs caused by repetitive and paralogous sequences, SNP positions with coverage < 5 and coverage in the top 5% (>30, according to the respective sequencing coverage) were filtered for the genome data (**Table 1**). The SNP rate in the DAOM-197198 genome was compared to the SNP rate in the homokaryotic (haploid) genome of the ectomycorrhizal ascomycete *T. melanosporum* Mel28 and the dikaryotic (diploid) genome of the ectomycorrhizal basidiomycete *Laccaria bicolor* S238N. Illumina genomic reads were mapped to the respective reference genomes available at the JGI MycoCosm portal and SNPs were called as described above. SNPs in transcripts of *R. irregularis* DAOM-197198, *R. irregularis* C2 and *R. diaphanum* MUCL43196 were identified using SAMtools v2.

Genes with the highest number of high quality SNPs in the *R. irregularis* genome assembly were validated by mapping transcriptome reads (38.5 Gb) from germinating spores (**Table S2**) to the genome assembly by using SAMtools v2 and CLC Genomic Workbench v6.5. Both the ‘Probabilistic variant detection’ and the ‘Quality based variant detection’ algorithms in CLC Genomic Workbench v6.5 were used (see descriptions at [http://www.clcsupport.com/clcgenomicsworkbench/650/index.php?manual=Probabilistic\\_variant\\_detection.html](http://www.clcsupport.com/clcgenomicsworkbench/650/index.php?manual=Probabilistic_variant_detection.html) and [http://www.clcsupport.com/clcgenomicsworkbench/650/index.php?manual=Quality\\_based\\_variant\\_detection.html#sec:SNPdetection](http://www.clcsupport.com/clcgenomicsworkbench/650/index.php?manual=Quality_based_variant_detection.html#sec:SNPdetection)).

### **1.5. Transposable elements, simple sequence repeats, mini-satellites and satellites**

RepeatScout (12) was used to identify *de novo* repetitive DNA in the *R. irregularis* assembly. The default parameters (with  $l=15$ ) were used. RepeatScout generated a library of 4,198 consensus sequences. This library was then filtered as follows: 1) all the sequences less than 100 bp in size were discarded; 2) repeats having less than ten copies in the genome were removed (as they may correspond to protein-coding gene families) and 3) repeats having significant hits to known proteins in UNIPROT (13) other than proteins known as belonging to TEs were removed. The remaining 2,012 consensus sequences remaining were annotated manually by a TBLASTX search (14) against RepBase (15); 21 consensus sequences showed homologies with Class 1 retrotransposons and 87 with Class 2 transposons (**Table S1**). The remaining 1,904 consensus sequences were not categorized. To identify full length LTR retrotransposons, a second *de novo* search was performed with LTR\_STRUC (16). The program yielded only two full-length candidate LTR retrotransposon sequences, which were checked for their homology using the TBLASTX against the sequences coming from the RepBase database. Neither element exhibited significant homology with known TE families. These sequences have been excluded from further analyses. The number of repeat element occurrences and the percent

of genome coverage were assessed by masking the genome assembly using RepeatMasker (17) with the 2,012 consensus sequences coming from the RepeatScout pipeline. RepeatMasker masked 11.30 % of the genome assembly; 10.30 % of the genome was masked by repeated elements belonging to unknown/uncategorized families, 0.29 % by Class 1 retrotransposons *Gypsy* and 0.71 by Class 2 transposons (**Table S1**). Notably, this proportion of repeated elements is expected to be a significant underestimate as over 16% of Illumina reads were not assembled and likely correspond to repeated sequences. This abundance of repeated structures was confirmed by Sanger sequencing of random fosmids. Not surprisingly, the sequenced fosmids showed a much higher abundance of TEs (36%) (**Fig. S4**). The fosmid regions that did not align to the genome assembly mainly coded for repeated elements (**Fig. S4**); 18 LTRs, including two complete *Gypsy* with similarity to *Rhizopus oryzae* LTRs and numerous LTR remnants were identified in fosmids. The fact that LTR retrotransposons are long (9 to 25 kb) (**Fig. S4**), highly repetitive and nested is the main explanation for the observed high fragmentation of the assembly.

MISA (<http://pgrc.ipk-gatersleben.de/misa/download/misa.pl>) with default parameters was used to identify mono- to hexanucleotide simple sequence repeat (SSR) motifs. A total of 73,276 SSRs have been identified in the *R. irregularis* genome corresponding to 62,641 mono-, 5,939 di-, 3,562 tri-, 879 tetra-, 180 penta- and 75 hexanucleotide motifs. The relative abundance of SSRs was calculated as the number of SSRs per Mb. For all 73,276 SSRs, the relative abundance was 804 SSRs/Mb. The *R. irregularis* genome is richer in SSR than any other fungal genome analyzed to date (18, 19). Looking at the relative abundance, the SSRs were more frequent in the UTR (1,389 SSR/Mbps) and introns (1,306 SSR/Mbps) than in intergenic regions (969 SSR/Mbps), TE (68 SSR/Mbps) and exons (65 SSR/Mbps). The abundance of SSRs in UTRs is not common in fungi and might represent an involvement of these repeated sequences in gene regulation as observed in human (20). Mini-satellites (motif of 7 to 100 bp) and satellites (motif >100bp) were searched for in the *R. irregularis* genome using the Tandem Repeats Finder software (21) with the following parameters: 2 7 7 80 10 50 500. A total of 34,040 mini-satellites and 2,026 satellites were identified with genome coverage of 2.43 % and 1.32%, respectively. These values are in the range found in other fungal genomes (19).

## 1.6. Gene calling and sequence analysis

Contigs larger than 1,000 bp produced by the assembly were used as input contigs for gene model generation and downstream analysis. Gene calling was conducted using the JGI Annotation Pipeline, which combines several gene predictors: i) protein-based gene models



were predicted using FGENESH+ (22) and GeneWise (23) seeded by BLASTx alignments of genomic sequence against sequences from the NCBI non-redundant protein set nr and from the JGI *Phycomyces* and *Mucor* annotations (<http://jgi.doe.gov/mucoromycotina/>; manuscript in preparation), ii) *ab initio* gene models were predicted using GeneMark-ES (24) and FGENESH, the latter trained on the set of putative full-length genes and reliable protein-based models, and iii) RNA-based gene models were derived either by assembling 14,749,180 RNA sequences into 52,409 contig sequences which were then modeled on genomic sequence, or by aligning 14,750,646 RNA sequences onto genomic sequence, and then assembling the alignments into gene models. GeneWise models were completed using scaffold data to find start and stop codons. RNA contig alignments to the genome were used to verify, complete, and extend the gene models. Because multiple gene models per locus were often generated, a single representative gene model for each locus was chosen based on protein similarity and RNA support, and used for further analysis. This led to a filtered set of 30,282 gene models with their properties and support by different lines of evidence summarized in **Table S3**. After filtering for bacterial contaminants (**Fig. S20**) and fragments of TEs, the final number of protein-coding genes was set to 28,232. Among these gene models, 23,561 genes have transcriptomic support (RNA-Seq) and/or showed sequence similarity to documented proteins and/or domains; these models were considered as ‘*high-confidence*’ gene models.

All predicted gene models were functionally annotated by the JGI Annotation Pipeline using InterProScan (25) and hardware-accelerated double-affine Smith-Waterman alignments (<http://www.timelogic.com/>) against highly curated databases such as SwissProt (26), KEGG (Kyoto Encyclopedia of Genes and Genomes) (27) and PFAM (28). KEGG hits were used to map EC numbers (29), and InterPro, KEGG, and SwissProt hits were used to map GO (Gene Ontology) terms (30). In addition, predicted proteins were annotated according to KOG (EuKaryotic Orthologous Groups) classification (31). Protein targeting predictions were made with signalP (32) and TMHMM (33). All gene models and annotations may be accessed at the JGI *Rhizophagus irregularis* Portal (<http://jgi.doe.gov/Glomus/>; (34)).

The different species chosen for multigene families prediction cover representative species in the Basidiomycota, Ascomycota, and Zygomycota. Protein sets were retrieved from the JGI MycoCosm Portal and the Broad Institute Portal. Multigene families were predicted from 185,398 predicted proteins found in *R. irregularis* and the other representative fungal genomes using the MCL Markov clustering algorithm (35) with inflation parameter set to 2.0. As a result, 7,689 protein families containing at least five sequences were identified. Multigene families were analyzed for evolutionary changes in protein family size using the CAFE program (36) (**Fig. S13**). The program uses a random birth and death process to model gene gain and loss

across a user specified tree structure. The distribution of family sizes generated under the random model provides a basis for assessing the significance of the observed family size differences among taxa ( $p$ -value  $<0.001$ ). CAFE estimates, for each branch in the tree, whether a protein family has not changed, has expanded or has contracted. The phylogenetic tree was constructed using maximum likelihood analyses of a concatenated alignment of 85 core genes representative of conserved fungal genes (FUNYBASE, <http://genome.jouy.inra.fr/funybase/>).

In *R. irregularis*, 1,014 families were expanded, 5,440 showed no change and 1,235 families had undergone contraction by comparison to a putative most recent common ancestor (MRCA). **Tables S5** and **S8** present contracted and expanded gene families with lower  $p$ -value in *R. irregularis* genome, respectively. The PFAM domains for these families were associated by homology searches using hmmscan from HMMER3 package (37) and the Pfam database (<http://pfam.sanger.ac.uk/>; (38)).

Secreted proteins were identified using a custom pipeline including the SignalP v4 (39), WolfPSort (40), TMHMM, TargetP (41), and PS-Scan algorithms (42). The secreted peptidases were identified in the genome using the MEROPS peptide database (<http://merops.sanger.ac.uk/>; (43); <http://merops.sanger.ac.uk>). Prediction of genes coding for polyketide synthases (PKS), modular nonribosomal peptide synthetases (NRPS), terpene cyclases, and dimethylallyl diphosphate tryptophan synthases (DMATS) was performed using the SMURF database (<http://jcvf.org/smurf/index.php>; (44)). The genes coding for protein kinases (kinome) from *R. irregularis* and other selected fungi were annotated and classified into one of the 12 major eukaryotic protein kinase groups using HMMSCAN searches from the HMMER3 package against multilevel HMM libraries from the Kinomer 1.0 database (<http://www.compbio.dundee.ac.uk/kinomer>; (45)) with a HMM bit score cutoff of 50.

Identification of carbohydrate active enzyme (CAZyme) genes in the *R. irregularis* genome, as well as in multiple genomes that were used for comparative analysis, was achieved using the CAZy database ([www.cazy.org](http://www.cazy.org)) annotation pipeline (46)). For each fungus, we have listed the number of representatives of each CAZy family and then performed a double clustering based on Bray-Curtis distances (i) between organisms according to their family distribution and (ii) between families according on their distribution pattern in the different genomes. Distances were computed using GINKGO (47) and the distance trees were constructed with FastME (<http://www.atgc-montpellier.fr/fastme/>).

MATA-HMGs proteins (MAT-HMG) representative of different fungal phyla were searched in the *R. irregularis* genome using reciprocal Blast procedures (i.e. BlastX, tBlastX, BlastP, tBlastN). For comparisons, similar searches were also performed across publicly available genome sequence data from members of the Zygomycota, Basidiomycota, and Ascomycota. All

potential MAT-HMGs identified in genome data from *Rhizophagus* spp. (this study) and in other available fungal genomes were further compared against the GenBank nr database in order to confirm their homology, and their sequences were manually inspected to avoid redundancy.

We used a set of rules as described previously (48) to annotate all transcription associated proteins (TAPs; comprising transcription factors, TF, and transcriptional regulators, TR) in the proteome. The total complement of TAPs consists of 1,439, which is the largest complement as compared with other fungi (**Table S7**). The number of HMG and TRAF TRs encoded by *R. irregularis* is exceptionally high as compared to most other organisms in this study (**Table S7**). HMG domain proteins are discussed in the main text. In mammals, the tumor necrosis factor receptor-associated factor (TRAF) TRs couple receptor proteins to signaling cascades. They interact with a variety of proteins that regulate receptor-induced cell fate decisions and are involved in innate immunity signaling.

Circular visualizations (**Fig. 2, Fig. S3 and S4**) were constructed using CIRCOS version 0.62 (49). Figures S5 and S7 were constructed using Integrative Genomics Viewer v2.2 (50). Phylogenetic reconstruction, expression profiling and protein domains of full-length *Rhizophagus*-specific tyrosine kinase-like proteins as shown in **Figure S14** was plotted using iTOL (51).

### 1.7. RNA extraction, RNA-Seq, clustering, and assembly

*Illumina sequencing of RNA from spores and mycorrhizal roots.* Total RNA was extracted using the RNeasy plant mini kit (Qiagen) following the manufacturer recommendations before quantification with the Nanodrop fluorospectrometer. RNA quality was determined by electrophoresis on an Agilent Bioanalyzer. RNA-Seq libraries were constructed using the standard Illumina TruSeq RNA protocol to sequence mRNA (P.N. RS-122-2001). mRNA were purified using oligodT-containing beads. Then, RNA was fragmented to generate double stranded cDNA for sequencing. Twelve cycles of PCR were applied to amplify libraries, and size selection was performed on E-gel (Invitrogen). Libraries were quantified by qPCR using the KAPA Library Quantification Kit (PN KK4824) to obtain an accurate quantification. Sequencing was carried out at the GeT-PlaGe facility (<https://genomique.genotoul.fr>, Toulouse, France) using the Illumina HiSeq 2000 instrument and the Illumina TruSeq SBS sequencing kit v3 (PN FC-401-3001) (100 bp-paired reads).

*RNA-Seq for assessing the intra- and interspecific variability in the transcriptome.* Total RNA was extracted from *in vitro* cultures of *R. irregularis* and *R. diaphanus* using the RNeasy plant mini kit (Qiagen) following the manufacturer recommendations before quantification with the

Nanodrop fluorospectrometer. RNA-Seq libraries were constructed using the standard Illumina TruSeq RNA protocol to sequence mRNA. mRNA were purified using oligodT-containing beads. Then, RNA was fragmented to generate double stranded cDNA for sequencing. Sequencing was carried out by Fasteris (Geneva, Switzerland) using one complete channel on the Illumina HiSeq 2000 instrument. The sequencing procedure yielded 201,051,108 and 176,382,504 100 bp-paired reads for *R. diaphanus* and *R. irregularis* C2, respectively. RNA-Seq reads are available at the NCBI Short Read Archive: Accession n° SRX312982 and SRX312214 for *R. diaphanum* and *R. irregularis* C2, respectively.

Reads were assembled using the Velvet Oases software (<http://www.ebi.ac.uk/~zerbino/oases/>), which builds a hash table of all possible *k*-mer (sequence of "k" bases) in the dataset and through de Bruijn graph construction and repeat resolution build de novo contigs. In opposition to VELVET contigs, OASES transcripts can share parts of their sequences between two variants of a given locus. Several values of *k*-mer (only odds number allowed) were used to optimize the assembly, with has values ranging from 89 to 95 used in the assembly transcriptome assembly process for both strains. The assembly resulting from an hash value of 93 was found to be the most optimal, and resulted in the acquisition of approximately 20,000 contigs for each strain. To validate the *de novo* assemblies and estimate the number of reads assembled, a BWA mapping was carried on the *de novo* contigs from the best Oases assembly with 100K pairs of each library. As could have been expected, the library map better on their respective assembly than on the combined one. Furthermore, the sum of the assembly is close to the statistics of the combined assembly.

*Gene expression and differential expression analysis.* To obtain expression (transcript) profiles for germinated spores in *R. irregularis* DAOM-197198, *R. irregularis* C2 and *R. diaphanum*, the RNA-Seq reads were separately mapped against the reference genome Gloin1 using TopHat v2.0.8 (52). The gene expression levels for each annotated gene model were then estimated as the number of Fragments Per Kilobase of exon per Million fragments mapped (FPKM) in exonic regions with Cuffdiff v2.0.2 (53) using upper quartile normalization and multi-mapped read correction. To detect symbiosis-related genes (**Table S11, S12, S14, S16**), transcript levels of *R. irregularis* genes expressed in *R. irregularis*-*M. truncatula* mycorrhizal roots and spores germinated for 2 or 9 days were assessed as described above and differential expression was obtained using the Cuffdiff method (54) with a FDR-adjusted *p*-value cutoff of 0.05. All experiments were carried out in triplicates.

## 1.8. Identification of large-scale genome duplications

In order to identify possible large scale duplication events, we employed the KeyS software as previously described (55). For the clustering of paralogous genes the minimal connectivity threshold used was 50% (half linkage). The distribution of the synonymous substitutions ( $K_s$ ) of the paralogues (**Fig. S8**) did not follow the expected steep exponential decay pattern (56), but rather exhibited a large right shoulder. This distribution pattern could be due to a much lower loss rate than typically observed (56), or due to several hidden large scale duplications contributing to the distribution. With regard to the former scenario, we carried out a regression analysis using  $y = a * \exp(-x * d)$ , where  $d$  is the decay or gene loss parameter (56). This resulted in  $R^2 = 0.97$  and  $d = 0.8$ . Since typical  $d$  values are an order of magnitude larger (7.0-23.9) (56), we also investigated whether hidden distributions might contribute to the observed distribution, by using the EMMIX software (57) to fit a mixture model of normal distributed components to the gene cluster distribution data. The purpose of the mixture model is to identify the mixed normal distributions that best describe the observed  $K_s$  distribution (58). The assumed mixed distributions were modeled with one to ten components and the EM algorithm was repeated 100 times with random starting values and 10 times with k-mean starting values. Additionally the algorithm was set to finish when the proposed model acquired an insignificant  $p$ -value. The criterion used to identify the best fitting model was the minimization of the Bayesian Information Criterion in addition to a significant  $p$ -value for the model. The proposed mixture model contains eight components, with average  $K_s$  values between 0.05 and 4.74 (**Fig. S8**). The  $R^2$  for the eight components is 0.94-0.96, i.e. in the same range as those of the exponential decay function. In the following, we analysed GO bias based on the eight components. However, it should be noted that exponential decay with  $d = 0.8$  is also a possible explanation for the observed distribution, as mentioned above. Yet, the GO bias pointed out below for the  $K_s$  range  $\sim 0.18$  to 4.74 is valid under either scenario.

To check whether the potential components were functionally biased, a GO bias analysis was conducted on the genes participating in the different components of the proposed mixture model, using the GOstats (59) R package. The  $p$ -value threshold was 0.01, the resulting  $p$ -values were false-discovery corrected (60). The Biological Process GO terms that were either over-represented per component were visualized (**Fig. S9**). The significantly biased GO terms for all three ontologies and the genes associated with these terms are shown in a series of Supplementary Tables that are downloadable from the INRA *Rhizophagus* web portal at: <http://mycor.nancy.inra.fr/IMG/GlomusGenome/index3.html>. Also, all GO graphs are downloadable for all significantly biased terms; here, over-represented terms are shown in green, under-represented terms in red .

*Annotation of genes phosphorus-related from the 8 EMMIX components.* In the components 1, 2, 3, 4, 5, 7 and 8 (*i.e.*, in all but the component with the lowest Ks, 6) we observed that phosphorus-related terms are consistently over-represented. After isolating the genes from the corresponding components that cause the bias towards phosphorus-related terms, we counted the number of these genes that are annotated as kinases (GO:0004672, protein kinase activity; <http://mycor.nancy.inra.fr/IMG/GlomerusGenome/index3.html>). As can be seen from the tables, most genes are annotated as kinases. The remainder are either annotated under the term phosphorylation (some of them might also be kinases), or as phosphate-containing compound metabolic process (eight genes).

The GO terms that appear in the GO Fisher's test related with phosphorus are GO:0006468 (Protein Phosphorylation), GO:0016310 (Phosphorylation), GO:0006796 (Phosphate-containing compound metabolic process) and GO:0006793 (Phosphorus metabolic process). Based on the GO and the KOG protein annotation, the file `Gloin1_KOG_GO_annotation.txt` was created, that combines the two annotations. The format of the file is tab-delimited, with 4 columns, the first having the protein id, the second the KOG annotation, the third the GO annotation and the fifth the number of GO terms that correspond to each gene.

In order to identify which genes out of each EMMIX component are related with the phosphorus-related terms, a python script was implemented that takes as input the genes with the phosphorus-related annotation and the genes from each of the components of the EMMIX output and produces files similar to the `Gloin1_KOG_GO_annotation.txt`, but only with the genes of interest. The table below contains the number of genes that are phosphorus-related for each component.

| <b>Component Number</b> | <b>Phosphorus-related genes</b> |
|-------------------------|---------------------------------|
| 1                       | 280                             |
| 2                       | 465                             |
| 3                       | 669                             |
| 4                       | 132                             |
| 5                       | 201                             |
| 7                       | 393                             |
| 8                       | 670                             |

The GO term GO:0004672 (protein kinase activity) was used to identify the genes that are also annotated as kinases, since just by using the word 'kinase' in the description we might lose some genes. In the table below we have the number of phosphorus-related genes that are annotated as kinases.

| <b>Component Number</b> | <b>Phosphorus-related genes</b> | <b>Kinase-annotated genes</b> |
|-------------------------|---------------------------------|-------------------------------|
| 1                       | 280                             | 266                           |
| 2                       | 465                             | 451                           |
| 3                       | 669                             | 650                           |
| 4                       | 132                             | 128                           |
| 5                       | 201                             | 201                           |
| 7                       | 393                             | 392                           |
| 8                       | 670                             | 653                           |

Paralog clustering for all genes showed that there were only nine near-identical paralogs ( $\geq 99.5\%$  identical on n.a. level, without leading/trailing gaps). In total there were 7,954 paralogs in the assembly. A similar analysis identified 1,357 and 12,360 paralogs in *Arabidopsis* and *Physcomitrella*, respectively.

Table S1 to S16



**Table S1.** The diversity and distribution of class I and class II transposable elements in the *R. irregularis* genome assembly. Distribution in various TE families, number of copies and % genome assembly coverage are shown. LINE, long interspersed nuclear element;

| <b>Class</b>          | <b>Superfamily</b>       | <b># consensus</b> | <b># copies</b> | <b>% genome</b> |
|-----------------------|--------------------------|--------------------|-----------------|-----------------|
| <b>Class I</b>        | <b>LINE</b>              | 11                 | 232             | 0.18            |
|                       | <i>Copia</i>             | 1                  | 25              | 0.01            |
|                       | <i>Gypsy</i>             | 9                  | 164             | 0.10            |
| <b>Total Class I</b>  |                          | 21                 | 421             | 0.29            |
| <b>Class II</b>       | <b>TIR</b>               | 69                 | 1183            | 0.57            |
|                       | <b>Polinton/Maverick</b> | 10                 | 157             | 0.10            |
|                       | <b>Helitron</b>          | 8                  | 78              | 0.04            |
| <b>Total Class II</b> |                          | 87                 | 1,418           | 0.71            |
| <b>Uncategorized</b>  |                          | 1,904              | 68,207          | 10.30           |
| <b>Total</b>          |                          | 2,012              | 70,046          | 11.30           |

**Table S2.** Genes with the highest number of high quality SNPs in the *R. irregularis* genome assembly. SNP calling was carried out by mapping genomic and transcriptome reads to the genome assembly by using SAMtools v2 and CLC Genomic Workbench v6.5.

| <b>Protein ID</b> | <b>IPR domain</b>              | <b># SNPs<br/>(SAMtools)</b> | <b># SNPs<br/>(CLC*)</b> | <b># SNPs<br/>(CLC**)</b> |
|-------------------|--------------------------------|------------------------------|--------------------------|---------------------------|
| 9966              | Protein kinase-like            | 9                            | 5                        | 4                         |
| 15612             | Protein kinase, core           | 4                            | 5                        | 4                         |
| 12595             | Carbohydrate-binding-like fold | 4                            | 8                        | 2                         |
| 1986              | BTB/POZ***                     | 3                            | 4                        | 3                         |
| 348164            | Peptidase S10                  | 3                            | 4                        | 2                         |
| 14919             | No hit                         | 2                            | 3                        | 3                         |
| 2038              | BTB/POZ                        | 2                            | 3                        | 3                         |
| 1905              | BTB/POZ                        | 2                            | 3                        | 2                         |
| 348638            | Cytochrome P450                | 2                            | 5                        | 4                         |

\* Probabilistic variant detection algorithm in CLC Genomic Workbench v6.5

([http://www.clcsupport.com/clcgenomicsworkbench/650/index.php?manual=Probabilistic\\_variant\\_detection.html](http://www.clcsupport.com/clcgenomicsworkbench/650/index.php?manual=Probabilistic_variant_detection.html))

\*\*Quality based variant detection in CLC Genomic Workbench v6.5.

([http://www.clcsupport.com/clcgenomicsworkbench/650/index.php?manual=Quality\\_based\\_variant\\_detection.html#sec:SNPdetection](http://www.clcsupport.com/clcgenomicsworkbench/650/index.php?manual=Quality_based_variant_detection.html#sec:SNPdetection))

\*\*\* The BTB/POZ: BTB (for BR-C, ttk and bab) or POZ (for Pox virus and Zinc finger) domain; the BTB/POZ domains from several zinc finger proteins have been shown to mediate transcriptional repression and to interact with components of histone deacetylase co-repressor complexes

**Table S3.** Properties of *Rhizophagus irregularis* gene models.

| <b>Property or number</b>                | <b>Value</b>       |
|------------------------------------------|--------------------|
| Avg. gene length                         | 1,188 nt           |
| Avg. transcript length                   | 890 nt             |
| Avg. protein length                      | 270 aa             |
| Avg. exon length                         | 257 nt             |
| Avg. intron length                       | 123 nt             |
| Avg. exon frequency                      | 3.5 exons per gene |
| # multiexon genes                        | 2,3251 (77%)       |
| # genes with similarity to protein in nr | 17,848 (59%)       |
| # genes in DAOM-197198 multigene family  | 21,996 (73%)       |
| # genes with RNA coverage                | 20,790 (69%)       |
| # genes with Pfam domain                 | 10,020 (33%)       |
| # genes with signal peptide              | 1,995 (7%)         |
| # genes with transmembrane domain        | 3,655 (12%)        |
| # genes with EC number                   | 2,750 (9%)         |
| # genes with GO term                     | 9,591 (32%)        |

Abbreviations: Avg., average; aa, amino acids; GO, Gene Ontology; nr, nonredundant database in GenBank; nt, nucleotides

**Table S4.** Number and percentage of expressed genes in *Rhizophagus irregularis* DAOM-197198, *R. irregularis* C2 and *R. diaphanum* MUCL43196. Expression profiles were obtained by mapping RNA-Seq reads of germinated spores from *R. irregularis* DAOM-197198, *R. irregularis* C2 and *R. diaphanum* MUCL43196 on the *R. irregularis* genome assembly.

|                                             | <b>% mapped reads</b> | <b># expressed genes</b> | <b>% expressed genes</b> |
|---------------------------------------------|-----------------------|--------------------------|--------------------------|
| <b>Spores DAOM-197198</b>                   | 84.0                  | 20,191                   | 71.5                     |
| <b>Spores <i>R. irregularis</i> C2</b>      | 70.6                  | 18,690                   | 66.2                     |
| <b>Spores <i>R. diaphanum</i> MUCL43196</b> | 58.4                  | 16,555                   | 58.6                     |
| <b><i>All strains</i></b>                   |                       | 22,299                   | 78.9                     |
| <b>Spores DAOM-197198 2d</b>                | 76.9                  | 17,883                   | 63.3                     |
| <b>Spores DAOM-197198 9d</b>                | 78.1                  | 18,324                   | 64.9                     |
| <b>Spores DAOM-197198 <i>in planta</i></b>  | 5.3                   | 13,463                   | 47.6                     |
| <b><i>All</i></b>                           |                       | 22,647                   | 80.2                     |

**Table S5.** The top 40 protein families in expansion (excluding transposon-related families) in *R. irregularis* genome as compared to representative fungi.

| Family | Pucgr | Ustma | Copci | Lacbi | Tubme | Aspni | Botci | Neucr | Sacce | Morel | Rhiir | Rhior | PFAM description                           |
|--------|-------|-------|-------|-------|-------|-------|-------|-------|-------|-------|-------|-------|--------------------------------------------|
| 0      | 0     | 0     | 0     | 0     | 0     | 0     | 0     | 0     | 0     | 2     | 1538  | 2     | Tyrosine protein kinase                    |
| 2      | 5     | 5     | 4     | 5     | 5     | 4     | 2     | 4     | 4     | 138   | 1066  | 21    | SeI1-like; Serine/threonine protein kinase |
| 5      | 0     | 1     | 0     | 0     | 0     | 0     | 1     | 0     | 0     | 1     | 915   | 0     | BTB/POZ                                    |
| 17     | 0     | 0     | 0     | 0     | 0     | 0     | 0     | 0     | 0     | 0     | 389   | 0     |                                            |
| 30     | 0     | 0     | 0     | 0     | 0     | 0     | 0     | 0     | 0     | 0     | 281   | 0     |                                            |
| 44     | 0     | 0     | 0     | 0     | 0     | 0     | 0     | 0     | 0     | 0     | 202   | 0     |                                            |
| 67     | 0     | 1     | 0     | 0     | 0     | 0     | 0     | 0     | 0     | 4     | 153   | 2     | Kelch repeat                               |
| 31     | 0     | 0     | 1     | 1     | 9     | 11    | 11    | 5     | 0     | 15    | 149   | 8     |                                            |
| 81     | 0     | 0     | 0     | 0     | 0     | 0     | 0     | 0     | 0     | 2     | 134   | 0     | SeI1-like; Tyrosine protein kinase         |
| 88     | 0     | 0     | 0     | 0     | 0     | 0     | 0     | 0     | 0     | 0     | 128   | 0     |                                            |
| 91     | 0     | 0     | 0     | 0     | 0     | 0     | 0     | 0     | 0     | 0     | 125   | 0     | Cytochrome P450                            |
| 103    | 0     | 0     | 0     | 0     | 0     | 0     | 0     | 0     | 0     | 0     | 117   | 0     |                                            |
| 112    | 0     | 0     | 0     | 0     | 0     | 0     | 0     | 0     | 0     | 0     | 111   | 0     |                                            |
| 113    | 0     | 0     | 0     | 0     | 0     | 0     | 0     | 0     | 0     | 0     | 109   | 0     |                                            |
| 115    | 0     | 0     | 0     | 0     | 0     | 0     | 0     | 0     | 0     | 0     | 108   | 0     |                                            |
| 120    | 0     | 0     | 0     | 0     | 0     | 0     | 0     | 0     | 0     | 0     | 106   | 0     |                                            |
| 127    | 0     | 0     | 0     | 0     | 0     | 0     | 0     | 0     | 0     | 0     | 103   | 0     |                                            |
| 138    | 0     | 0     | 0     | 0     | 0     | 0     | 0     | 0     | 0     | 0     | 97    | 0     |                                            |
| 145    | 0     | 0     | 0     | 0     | 0     | 0     | 0     | 0     | 0     | 0     | 93    | 0     |                                            |
| 33     | 1     | 0     | 7     | 6     | 1     | 1     | 1     | 1     | 0     | 15    | 93    | 62    | Methyltransferase type 11                  |
| 132    | 5     | 0     | 0     | 4     | 0     | 0     | 0     | 0     | 0     | 0     | 92    | 0     |                                            |
| 167    | 0     | 0     | 0     | 0     | 0     | 0     | 0     | 0     | 0     | 0     | 86    | 0     |                                            |
| 176    | 0     | 0     | 0     | 0     | 0     | 0     | 0     | 0     | 0     | 0     | 84    | 0     | BTB/POZ                                    |
| 183    | 0     | 0     | 0     | 0     | 0     | 0     | 0     | 0     | 0     | 0     | 83    | 0     |                                            |
| 187    | 0     | 0     | 0     | 0     | 0     | 0     | 0     | 1     | 0     | 0     | 81    | 0     |                                            |
| 218    | 0     | 0     | 0     | 0     | 0     | 0     | 0     | 0     | 0     | 0     | 74    | 0     |                                            |
| 238    | 0     | 0     | 0     | 0     | 0     | 0     | 0     | 0     | 0     | 0     | 70    | 0     | Guanylate-binding protein                  |
| 258    | 0     | 0     | 0     | 0     | 0     | 0     | 0     | 0     | 0     | 0     | 67    | 0     |                                            |
| 9      | 12    | 12    | 45    | 51    | 16    | 102   | 107   | 24    | 1     | 25    | 67    | 25    | Cytochrome P450                            |
| 266    | 0     | 0     | 0     | 0     | 0     | 0     | 0     | 0     | 0     | 0     | 65    | 0     | Zinc finger, C2H2-type                     |
| 286    | 0     | 0     | 0     | 0     | 0     | 0     | 0     | 0     | 0     | 0     | 61    | 0     |                                            |
| 282    | 0     | 0     | 0     | 0     | 0     | 0     | 0     | 0     | 0     | 0     | 59    | 0     | Tetratricopeptide TPR1/TPR2                |
| 298    | 0     | 0     | 0     | 0     | 0     | 0     | 0     | 0     | 0     | 0     | 59    | 0     |                                            |
| 299    | 0     | 0     | 0     | 0     | 0     | 0     | 0     | 0     | 0     | 0     | 59    | 0     | Tyrosine protein kinase                    |
| 314    | 0     | 0     | 0     | 0     | 0     | 0     | 0     | 0     | 0     | 0     | 58    | 0     |                                            |
| 59     | 5     | 4     | 6     | 18    | 8     | 5     | 6     | 7     | 6     | 14    | 58    | 13    | Ubiquitin; Ribosomal protein S27a          |
| 339    | 0     | 0     | 0     | 0     | 0     | 0     | 0     | 0     | 0     | 0     | 55    | 0     |                                            |
| 41     | 26    | 0     | 4     | 12    | 0     | 0     | 0     | 0     | 0     | 0     | 55    | 30    |                                            |
| 362    | 0     | 0     | 0     | 0     | 0     | 0     | 0     | 0     | 0     | 0     | 53    | 0     | Tyrosine protein kinase                    |
| 363    | 0     | 0     | 0     | 0     | 0     | 0     | 0     | 0     | 0     | 0     | 53    | 0     | High mobility group box, HMG1/HMG2         |

The table lists TRIBE-MCL families that are in expansion in the *R. irregularis* lineage (gray row, CAFE analysis,  $P < 0.001$ ) (Fig. S14). Annotations are based on searches of *T. melanosporum* protein sequences against the PFAM database. Abbreviations: Pucgr: *Puccinia graminis*; Ustma: *Ustilago maydis*; Copci: *Coprinopsis cinerea*; Lacbi: *Laccaria bicolor*; Tubme: *Tuber melanosporum*; Aspni: *Aspergillus niger*; Botci: *Botrytis cinerea*; Neucr: *Neurospora crassa*; Sacce: *Saccharomyces cerevisiae*; Rhior: *Rhizopus oryzae*; Morel: *Mortierella elongata*; Rhiir: *Rhizophagus irregularis*.

**Table S6.** The repertoire of protein kinases (kinome) in *R. irregularis* (gray row) compared to the kinomes of representative fungi. Protein kinase domains have been identified by HMMER search against the KINOMER database (<http://www.compbio.dundee.ac.uk/kinomer>, multilevel HMM library); score >50. Kinases are classified into major groups.

|                                 | AGC       | CAMK      | CK1       | CMGC      | RGC | STE       | TK | TKL         | PIKK     | PDHK     | RIO | Alpha |
|---------------------------------|-----------|-----------|-----------|-----------|-----|-----------|----|-------------|----------|----------|-----|-------|
| <i>Puccinia graminis</i>        | 25        | 32        | 7         | 22        | 0   | 17        | 0  | 3           | 3        | 3        | 2   | 17    |
| <i>Ustilago maydis</i>          | 16        | 31        | 2         | 20        | 0   | 15        | 0  | 2           | 2        | 3        | 2   | 0     |
| <i>Coprinopsis cinerea</i>      | 24        | 30        | 5         | 29        | 0   | 21        | 0  | 15          | 3        | 3        | 2   | 0     |
| <i>Laccaria bicolor</i>         | 25        | 38        | 12        | 45        | 0   | 18        | 0  | 42          | 3        | 3        | 2   | 0     |
| <i>Saccharomyces cerevisiae</i> | 22        | 40        | 4         | 25        | 0   | 15        | 0  | 1           | 4        | 2        | 1   | 0     |
| <i>Tuber melanosporum</i>       | 19        | 28        | 2         | 23        | 0   | 13        | 0  | 1           | 3        | 3        | 2   | 0     |
| <i>Aspergillus niger</i>        | 18        | 27        | 3         | 43        | 0   | 16        | 0  | 0           | 5        | 3        | 2   | 0     |
| <i>Botrytis cinerea</i>         | 17        | 25        | 1         | 20        | 0   | 14        | 0  | 2           | 4        | 3        | 2   | 0     |
| <i>Neurospora crassa</i>        | 18        | 29        | 3         | 23        | 0   | 14        | 0  | 2           | 4        | 3        | 2   | 2     |
| <i>Rhizopus oryzae</i>          | <b>58</b> | <b>93</b> | <b>18</b> | <b>50</b> | 0   | <b>55</b> | 0  | 3           | <b>5</b> | <b>6</b> | 2   | 0     |
| <i>Rhizophagus irregularis</i>  | 25        | 41        | 3         | 24        | 0   | 22        | 0  | <b>832*</b> | 4        | 3        | 2   | 13    |
| <i>Dictyostelium discoideum</i> | 27        | 41        | 3         | 35        | 0   | 45        | 0  | 72          | 4        | 0        | 2   | 6     |

\*88 TKL with whole catalytic domain; 812 expressed TKLs.

Abbreviations: TKL, tyrosine kinase-like proteins. AGC, protein kinases A, G, and C; CAMK, calcium/calmodulin-dependent kinases; CK1, casein kinase 1; CMGC, cyclin- dependent kinases, mitogen-activated, glycogen-synthase, and CDK-like kinases; STE, sterile phenotype kinases; RGC, receptor guanylate cyclase kinases ; TK, tyrosine kinases ; PIKK, phosphatidyl inositol 30 kinase-related kinases ; PDHK, pyruvate dehydrogenase kinases ; RIO, right open reading frame kinases ; Alpha, Alpha kinases.

**Table S7.** Distribution of genes involved in transcription in the genomes of *Rhizophagus irregularis* and representative fungi.

| <b>Transcription Factors</b> | <i>Puccinia graminis</i> | <i>Ustilago maydis</i> | <i>Coprinopsis cinerea</i> | <i>Laccaria bicolor</i> | <i>Saccharomyces cerevisiae</i> | <i>Tuber melanosporum</i> | <i>Aspergillus niger</i> | <i>Botrytis cinerea</i> | <i>Neurospora crassa</i> | <i>Rhizopus oryzae</i> | <b><i>Rhizophagus irregularis</i></b> | <i>Dictyostelium discoideum</i> |
|------------------------------|--------------------------|------------------------|----------------------------|-------------------------|---------------------------------|---------------------------|--------------------------|-------------------------|--------------------------|------------------------|---------------------------------------|---------------------------------|
| AP2/EREBP                    | 0                        | 0                      | 0                          | 0                       | 0                               | 0                         | 0                        | 0                       | 0                        | 0                      | 0                                     | 0                               |
| Argonaute                    | 2                        | 0                      | 7                          | 6                       | 0                               | 3                         | 1                        | 1                       | 2                        | 2                      | 26                                    | 5                               |
| ARID                         | 2                        | 2                      | 2                          | 2                       | 2                               | 2                         | 2                        | 4                       | 3                        | 2                      | 2                                     | 2                               |
| bHLH                         | 7                        | 12                     | 10                         | 16                      | 7                               | 8                         | 13                       | 9                       | 15                       | 52                     | 11                                    | 0                               |
| BSD domain containing        | 2                        | 1                      | 2                          | 1                       | 2                               | 2                         | 2                        | 2                       | 2                        | 2                      | 2                                     | 3                               |
| bZIP                         | 8                        | 7                      | 10                         | 9                       | 12                              | 27                        | 16                       | 11                      | 12                       | 48                     | 17                                    | 19                              |
| C2C2_GATA                    | 5                        | 9                      | 10                         | 12                      | 10                              | 6                         | 6                        | 6                       | 6                        | 32                     | 19                                    | 20                              |
| C2H2                         | 72                       | 30                     | 64                         | 62                      | 39                              | 58                        | 65                       | 61                      | 68                       | 121                    | 95                                    | 27                              |
| C3H                          | 9                        | 15                     | 21                         | 26                      | 7                               | 12                        | 14                       | 15                      | 11                       | 24                     | 19                                    | 20                              |
| CCAAT_Dr1                    | 1                        | 1                      | 1                          | 1                       | 1                               | 1                         | 1                        | 0                       | 1                        | 2                      | 1                                     | 1                               |
| CCAAT_Hap2                   | 1                        | 1                      | 1                          | 0                       | 1                               | 1                         | 1                        | 1                       | 1                        | 2                      | 3                                     | 1                               |
| CCAAT_Hap3                   | 1                        | 2                      | 2                          | 2                       | 1                               | 2                         | 2                        | 3                       | 2                        | 2                      | 1                                     | 2                               |
| CCAAT_Hap5                   | 2                        | 4                      | 3                          | 2                       | 3                               | 3                         | 2                        | 2                       | 5                        | 3                      | 4                                     | 5                               |
| Coactivator p15              | 0                        | 0                      | 1                          | 1                       | 1                               | 0                         | 1                        | 1                       | 1                        | 1                      | 1                                     | 2                               |
| CPP                          | 0                        | 0                      | 0                          | 0                       | 0                               | 0                         | 0                        | 0                       | 0                        | 0                      | 0                                     | 1                               |
| CSD                          | 3                        | 0                      | 0                          | 0                       | 0                               | 0                         | 1                        | 0                       | 0                        | 0                      | 6                                     | 0                               |
| DDT                          | 0                        | 1                      | 1                          | 1                       | 2                               | 0                         | 1                        | 1                       | 1                        | 2                      | 0                                     | 1                               |
| Dicer                        | 1                        | 0                      | 0                          | 0                       | 0                               | 0                         | 0                        | 0                       | 0                        | 0                      | 1                                     | 0                               |
| DUF547 domain containing     | 0                        | 0                      | 0                          | 0                       | 0                               | 0                         | 0                        | 0                       | 0                        | 0                      | 0                                     | 1                               |
| DUF833 domain containing     | 1                        | 1                      | 1                          | 1                       | 1                               | 1                         | 1                        | 0                       | 1                        | 0                      | 1                                     | 0                               |
| E2F/DP                       | 0                        | 0                      | 0                          | 0                       | 0                               | 0                         | 0                        | 0                       | 0                        | 3                      | 2                                     | 3                               |
| FHA                          | 4                        | 4                      | 9                          | 10                      | 14                              | 9                         | 9                        | 9                       | 9                        | 18                     | 10                                    | 20                              |
| GIF                          | 0                        | 0                      | 0                          | 0                       | 0                               | 0                         | 0                        | 0                       | 0                        | 0                      | 0                                     | 0                               |
| GNAT                         | 10                       | 19                     | 27                         | 23                      | 12                              | 17                        | 34                       | 30                      | 25                       | 28                     | 21                                    | 35                              |
| HB                           | 8                        | 6                      | 10                         | 10                      | 8                               | 4                         | 4                        | 6                       | 5                        | 37                     | 9                                     | 14                              |
| HMG                          | 11                       | 8                      | 25                         | 15                      | 7                               | 8                         | 7                        | 8                       | 10                       | 27                     | 126                                   | 4                               |
| HSF                          | 6                        | 4                      | 3                          | 4                       | 5                               | 3                         | 3                        | 3                       | 3                        | 17                     | 4                                     | 1                               |

|                             |    |    |    |    |    |    |    |    |    |    |     |    |   |
|-----------------------------|----|----|----|----|----|----|----|----|----|----|-----|----|---|
| IWS1                        | 1  | 1  | 1  | 1  | 1  | 1  | 1  | 1  | 1  | 1  | 1   | 0  | 1 |
| Jumonji                     | 1  | 1  | 1  | 1  | 1  | 1  | 1  | 1  | 1  | 1  | 1   | 1  | 0 |
| LIM                         | 5  | 5  | 5  | 6  | 3  | 4  | 4  | 4  | 4  | 9  | 4   | 15 |   |
| MADS                        | 2  | 2  | 1  | 3  | 4  | 2  | 2  | 1  | 2  | 9  | 2   | 4  |   |
| MBF1                        | 1  | 0  | 1  | 1  | 1  | 1  | 1  | 1  | 1  | 2  | 1   | 0  |   |
| MED6                        | 1  | 1  | 1  | 1  | 1  | 1  | 1  | 1  | 1  | 1  | 2   | 1  |   |
| MED7                        | 0  | 1  | 1  | 1  | 1  | 2  | 1  | 1  | 1  | 1  | 1   | 1  |   |
| MYB-related                 | 4  | 4  | 7  | 5  | 10 | 8  | 7  | 10 | 9  | 15 | 24  | 16 |   |
| MYB                         | 2  | 5  | 6  | 8  | 5  | 7  | 8  | 5  | 8  | 10 | 19  | 13 |   |
| PcG_FIE                     | 0  | 0  | 0  | 0  | 0  | 1  | 0  | 0  | 0  | 0  | 3   | 0  |   |
| PcG_VEFS                    | 0  | 0  | 0  | 0  | 0  | 1  | 0  | 0  | 0  | 0  | 1   | 0  |   |
| PHD                         | 8  | 12 | 14 | 13 | 10 | 9  | 15 | 11 | 14 | 22 | 16  | 11 |   |
| RB                          | 0  | 0  | 0  | 0  | 0  | 0  | 0  | 0  | 0  | 0  | 0   | 1  |   |
| Rcd1-like                   | 1  | 1  | 1  | 1  | 1  | 1  | 1  | 1  | 1  | 1  | 1   | 2  |   |
| RF-X                        | 1  | 1  | 1  | 1  | 1  | 1  | 1  | 0  | 1  | 0  | 0   | 0  |   |
| RRN3                        | 1  | 1  | 1  | 1  | 1  | 1  | 1  | 1  | 1  | 1  | 1   | 1  |   |
| RWP-RK                      | 0  | 0  | 0  | 0  | 0  | 0  | 0  | 0  | 0  | 0  | 0   | 2  |   |
| SET                         | 8  | 5  | 7  | 15 | 5  | 7  | 8  | 7  | 9  | 12 | 12  | 11 |   |
| Sin3                        | 2  | 1  | 4  | 4  | 1  | 1  | 1  | 0  | 1  | 6  | 2   | 1  |   |
| Sir2                        | 4  | 4  | 8  | 8  | 5  | 12 | 6  | 6  | 7  | 4  | 5   | 5  |   |
| SOH1                        | 0  | 1  | 1  | 1  | 1  | 0  | 1  | 1  | 1  | 0  | 1   | 1  |   |
| SWI/SNF_BAF60b              | 2  | 1  | 2  | 3  | 3  | 2  | 2  | 2  | 2  | 5  | 2   | 2  |   |
| SWI/SNF_SNF2                | 48 | 17 | 24 | 19 | 17 | 17 | 23 | 24 | 25 | 25 | 15  | 22 |   |
| SWI/SNF_SWI3                | 0  | 0  | 0  | 0  | 2  | 2  | 1  | 1  | 2  | 4  | 2   | 0  |   |
| TEA                         | 0  | 0  | 0  | 0  | 1  | 1  | 1  | 0  | 0  | 1  | 0   | 0  |   |
| TFb2                        | 2  | 1  | 1  | 2  | 1  | 1  | 1  | 1  | 1  | 1  | 1   | 1  |   |
| TRAF                        | 1  | 2  | 15 | 10 | 1  | 6  | 5  | 13 | 6  | 15 | 536 | 20 |   |
| Trihelix                    | 0  | 0  | 0  | 0  | 0  | 0  | 0  | 0  | 0  | 0  | 3   | 0  |   |
| TUB                         | 0  | 0  | 0  | 0  | 0  | 0  | 0  | 0  | 0  | 1  | 1   | 0  |   |
| WRKY                        | 0  | 0  | 0  | 0  | 0  | 0  | 0  | 0  | 0  | 3  | 1   | 1  |   |
| Zinc finger, AN1 & A20 type | 0  | 0  | 1  | 1  | 2  | 1  | 1  | 1  | 1  | 4  | 5   | 4  |   |



|                       |    |    |    |    |    |    |     |     |    |    |    |   |
|-----------------------|----|----|----|----|----|----|-----|-----|----|----|----|---|
| Zinc finger, MIZ type | 4  | 1  | 1  | 2  | 3  | 2  | 3   | 2   | 2  | 1  | 0  | 7 |
| Zinc finger, ZPR1     | 1  | 1  | 1  | 1  | 1  | 1  | 1   | 1   | 1  | 1  | 1  | 1 |
| Zn_cluster            | 24 | 85 | 41 | 65 | 53 | 58 | 235 | 103 | 95 | 30 | 20 | 2 |

**Table S8.** The top 30 protein families in contraction (excluding TE-related families) in *R. irregularis* genome as compared to other fungi.

| Family ID | Pucgr | Ustma | Copci | Lacbi | Tubme | Aspni | Botci | Neucr | Sacce | Morel | Rhiir | Rhior | PFAM description                        |
|-----------|-------|-------|-------|-------|-------|-------|-------|-------|-------|-------|-------|-------|-----------------------------------------|
| 1         | 74    | 52    | 76    | 84    | 59    | 58    | 59    | 60    | 75    | 140   | 75    | 214   | Serine/threonine protein kinase         |
| 3         | 42    | 37    | 53    | 150   | 35    | 49    | 43    | 37    | 33    | 224   | 54    | 73    | WD40 repeat                             |
| 37        | 16    | 7     | 5     | 12    | 3     | 11    | 16    | 17    | 6     | 36    | 9     | 33    | Peptidase A1                            |
| 47        | 17    | 6     | 16    | 11    | 6     | 3     | 5     | 3     | 2     | 29    | 8     | 34    | Polysaccharide deacetylase              |
| 58        | 5     | 6     | 7     | 7     | 6     | 9     | 5     | 6     | 11    | 23    | 7     | 31    | Zinc finger, C2H2-type                  |
| 166       | 0     | 0     | 0     | 0     | 0     | 0     | 0     | 0     | 0     | 77    | 2     | 1     | Leucine-rich repeat ; Cyclin-like F-box |
| 179       | 0     | 1     | 2     | 4     | 0     | 8     | 11    | 0     | 2     | 45    | 2     | 1     |                                         |
| 123       | 3     | 3     | 6     | 9     | 1     | 17    | 8     | 3     | 2     | 8     | 1     | 13    | NADH:flavin oxidoreductase              |
| 154       | 16    | 2     | 8     | 8     | 2     | 10    | 4     | 6     | 1     | 8     | 1     | 8     | Glycoside hydrolase, family 18          |
| 447       | 0     | 1     | 1     | 1     | 0     | 0     | 1     | 0     | 0     | 25    | 1     | 6     | Peptidase M13                           |
| 52        | 0     | 0     | 0     | 0     | 1     | 10    | 5     | 2     | 0     | 172   | 0     | 0     | Monooxygenase, FAD-binding              |
| 32        | 0     | 0     | 0     | 0     | 0     | 0     | 0     | 0     | 0     | 11    | 0     | 35    | Zinc finger, CCHC-type                  |
| 48        | 0     | 0     | 0     | 0     | 0     | 0     | 0     | 0     | 0     | 11    | 0     | 41    | Zinc finger, SWIM-type                  |
| 279       | 0     | 0     | 0     | 0     | 0     | 0     | 0     | 0     | 0     | 22    | 0     | 12    |                                         |
| 63        | 0     | 7     | 10    | 13    | 2     | 41    | 24    | 9     | 4     | 17    | 0     | 16    | Major facilitator superfamily MFS-1     |
| 68        | 12    | 8     | 6     | 11    | 6     | 24    | 19    | 10    | 18    | 24    | 0     | 10    | Amino acid permease                     |
| 172       | 0     | 0     | 0     | 0     | 0     | 0     | 0     | 0     | 0     | 85    | 0     | 0     |                                         |
| 206       | 0     | 0     | 0     | 0     | 0     | 0     | 0     | 0     | 0     | 76    | 0     | 0     | Kelch repeat                            |
| 93        | 4     | 6     | 4     | 9     | 5     | 34    | 21    | 4     | 4     | 8     | 0     | 9     | Amino acid permease                     |
| 225       | 0     | 0     | 0     | 0     | 0     | 0     | 0     | 0     | 0     | 72    | 0     | 0     | Pentapeptide repeat; WD40 repeat        |
| 249       | 0     | 0     | 0     | 0     | 0     | 0     | 0     | 0     | 0     | 68    | 0     | 0     | Cyclin-like F-box                       |
| 270       | 0     | 0     | 0     | 0     | 0     | 0     | 0     | 0     | 0     | 64    | 0     | 0     |                                         |
| 62        | 6     | 8     | 19    | 15    | 3     | 44    | 39    | 9     | 0     | 27    | 0     | 1     | Carboxylesterase, type B                |
| 333       | 0     | 0     | 0     | 0     | 0     | 0     | 0     | 0     | 0     | 55    | 0     | 0     |                                         |
| 361       | 0     | 0     | 0     | 0     | 0     | 0     | 0     | 0     | 0     | 53    | 0     | 0     | Cyclin-like F-box                       |
| 384       | 0     | 0     | 0     | 0     | 0     | 0     | 0     | 0     | 0     | 51    | 0     | 0     | Cyclin-like F-box                       |
| 442       | 0     | 0     | 0     | 0     | 0     | 0     | 0     | 0     | 0     | 8     | 0     | 15    | Spore coat protein Coth                 |
| 842       | 0     | 0     | 1     | 1     | 1     | 0     | 0     | 1     | 0     | 7     | 0     | 8     |                                         |

The table lists TRIBE-MCL families that are in contraction in the *R. irregularis* lineage (gray row, CAFE analysis,  $P < 0.001$ ) (Fig. S14). Abbreviations: Pucgr: *Puccinia graminis* ; Ustma: *Ustilago maydis* ; Copci: *Coprinopsis cinerea* ; Lacbi: *Laccaria bicolor* ; Tubme: *Tuber melanosporum* ; Aspni: *Aspergillus niger* ; Botci: *Botrytis cinerea* ; Neucr: *Neurospora crassa* ; Sacce: *Saccharomyces cerevisiae* ; Rhior: *Rhizopus oryzae* ; Morel: *Mortierella elongata* ; Rhiir: *Rhizophagus irregularis*

**Table S9.** *Saccharomyces cerevisiae* proteins missing in the obligate biotrophic pathogen, *Blumeria graminis*, the obligate symbiont *Rhizophagus irregularis* and other representative saprotrophic or symbiotic fungi. BLASTP e-value, 1<sup>e</sup>-5. Yeast proteome was obtained via Saccharomyces Genome Database ([http://downloads.yeastgenome.org/sequence/S288C\\_reference/orf\\_protein](http://downloads.yeastgenome.org/sequence/S288C_reference/orf_protein)). This missing ascomycete core genes (MACGs) procedure has been adapted from Spanu *et al.* (61). Blugr, *Blumeria graminis*; Pucgr, *Puccinia graminis*; Ustma, *Ustilago maydis*; Copci, *Coprinopsis cinerea*; Lacbi, *Laccaria bicolor*; Tubme, *Tuber melanosporum*; Aspni, *Aspergillus niger*; Botci, *Botrytis cinerea*; Neucr, *Neurospora crassa*; Mucci, *Mucor circinelloides*; Phybl, *Phycomyces blakesleeanus*; Rhior: *Rhizopus oryzae*; Batde, *Batrachochytrium dendrobatidis*; Rhiir, *Rhizophagus irregularis*.

| Name                                                      | Description                                                  | Blugr | Pucgr | Ustma | Copci | Lacbi | Tubme | Aspni | Botci | Neucr | Mucci | Phybl | Rhior | Batde | Rhiir |
|-----------------------------------------------------------|--------------------------------------------------------------|-------|-------|-------|-------|-------|-------|-------|-------|-------|-------|-------|-------|-------|-------|
| <b>Thiamine metabolism/transport</b>                      |                                                              |       |       |       |       |       |       |       |       |       |       |       |       |       |       |
| YGR144W                                                   | Thiamine thiazole synthase                                   | No    | yes   | yes   | yes   | No    | No    | yes   | yes   | yes   | yes   | No    | yes   | No    | No    |
| YPL214C                                                   | Thiamine biosynthetic bifunctional enzyme                    | No    | yes   | No    |
| YLR237W                                                   | Thiamine transporter                                         | No    | No    | yes   | No    | yes   | yes   | yes   | yes   | yes   | No    | No    | No    | No    | No    |
| YOL055C                                                   | Hydroxymethylpyrimidine/phosphomethylpyrimidine kinase THI20 | No    | yes   | No    | No    |
| YPL258C                                                   | Hydroxymethylpyrimidine/phosphomethylpyrimidine kinase THI21 | No    | yes   | No    | No    |
| YPR121W                                                   | Thiamine biosynthesis protein THI22                          | No    | yes   | yes   | yes   | yes   | yes   | yes   | No    | yes   | yes   | yes   | yes   | No    | No    |
| YOR192C                                                   | Thiamine transporter THI72                                   | No    | No    | yes   | No    | yes   | yes   | yes   | yes   | yes   | No    | No    | No    | No    | No    |
| YOR071C                                                   | Nicotinamide riboside transporter 1                          | No    | No    | yes   | No    | yes   | yes   | yes   | yes   | yes   | No    | No    | No    | No    | No    |
| <b>Allantoine metabolism/transport</b>                    |                                                              |       |       |       |       |       |       |       |       |       |       |       |       |       |       |
| YIR027C                                                   | Allantoinase                                                 | No    | yes   | No    | yes   | No    | yes   |
| YIR029W                                                   | Allantoicase                                                 | No    | yes   |
| YIR028W                                                   | Allantoin permease                                           | No    | No    | yes   | No    | yes   | yes   | yes   | yes   | yes   | No    | No    | No    | No    | No    |
| YIR023W                                                   | Transcriptional activator protein DAL81                      | No    | No    | yes   |
| YHL016C                                                   | Urea active transporter                                      | No    | No    | yes   | No    | yes   | No    | yes   |
| <b>Methionine metabolism and (siro-)heme biosynthesis</b> |                                                              |       |       |       |       |       |       |       |       |       |       |       |       |       |       |
| YKR069W                                                   | Uroporphyrinogen-III C-methyltransferase                     | No    | No    | yes   | No    | yes   |

|         |                                           |    |    |     |     |     |     |     |     |     |     |     |     |     |     |
|---------|-------------------------------------------|----|----|-----|-----|-----|-----|-----|-----|-----|-----|-----|-----|-----|-----|
| YJR010W | Sulfate adenylyltransferase               | No | No | yes | No  | yes |
| YBR213W | Siroheme biosynthesis protein MET8        | No | No | yes | No  | yes |
| YKL001C | Adenylyl-sulfate kinase                   | No | No | yes | No  | yes |
| YPR167C | Phosphoadenosine phosphosulfate reductase | No | No | yes | No  | yes |
| YOR278W | Uroporphyrinogen-III synthase             | No | No | No  | yes |

**Alcohol metabolism/fermentation**

|         |                                             |    |     |     |     |     |     |     |     |     |     |     |     |     |     |
|---------|---------------------------------------------|----|-----|-----|-----|-----|-----|-----|-----|-----|-----|-----|-----|-----|-----|
| YGL256W | Alcohol dehydrogenase 4                     | No | No  | yes | No  | No  |
| YCR107W | Putative aryl-alcohol dehydrogenase AAD3    | No | No  | yes |
| YDL243C | Probable aryl-alcohol dehydrogenase AAD4    | No | No  | yes |
| YFL056C | Putative aryl-alcohol dehydrogenase AAD6    | No | No  | yes |
| YJR155W | Putative aryl-alcohol dehydrogenase AAD10   | No | No  | yes |
| YNL331C | Putative aryl-alcohol dehydrogenase AAD14   | No | No  | yes |
| YOL165C | Putative aryl-alcohol dehydrogenase AAD15   | No | No  | yes | yes | yes | No  | yes | yes | yes | yes | No  | yes | No  | yes |
| YFL057C | Putative aryl-alcohol dehydrogenase AAD16   | No | No  | yes | yes | yes | No  | yes | yes | yes | yes | yes | yes | No  | yes |
| YPL088W | Putative aryl-alcohol dehydrogenase YPL088W | No | yes |
| YLR044C | Pyruvate decarboxylase isozyme 1            | No | yes | No  | yes |
| YOL086C | Alcohol dehydrogenase 1                     | No | No  | yes |

**Glutamate metabolism**

|         |                                         |    |    |     |     |     |     |     |     |     |     |     |     |     |     |
|---------|-----------------------------------------|----|----|-----|-----|-----|-----|-----|-----|-----|-----|-----|-----|-----|-----|
| YOR375C | NADP-specific glutamate dehydrogenase 1 | No | No | yes |
| YAL062W | NADP-specific glutamate dehydrogenase 2 | No | No | yes |

**Uracil metabolism/transport**

|         |                  |    |    |     |    |     |     |     |     |     |    |    |    |    |    |
|---------|------------------|----|----|-----|----|-----|-----|-----|-----|-----|----|----|----|----|----|
| YBL042C | Uridine permease | No | No | yes | No | yes | yes | yes | yes | yes | No | No | No | No | No |
|---------|------------------|----|----|-----|----|-----|-----|-----|-----|-----|----|----|----|----|----|

|                                           |                                          |    |     |     |     |     |     |     |     |     |     |     |     |     |     |
|-------------------------------------------|------------------------------------------|----|-----|-----|-----|-----|-----|-----|-----|-----|-----|-----|-----|-----|-----|
| YBR021W                                   | Uracil permease                          | No | No  | yes | No  | yes | yes | yes | yes | yes | No  | No  | No  | No  | No  |
| YKL216W                                   | Dihydroorotate dehydrogenase             | No | No  | yes | yes | yes | yes | No  | yes |
| <b>Glutathione metabolism</b>             |                                          |    |     |     |     |     |     |     |     |     |     |     |     |     |     |
| YGR154C                                   | Glutathione S-transferase omega-like 1   | No | No  | yes | No  | yes |
| YMR251W                                   | Glutathione S-transferase omega-like 3   | No | No  | yes | No  | yes |
| YKR076W                                   | Glutathione S-transferase omega-like 2   | No | No  | yes | No  | yes |
| YLR299W                                   | Gamma-glutamyltransferase                | No | yes |
| <b>Detoxification/stress response</b>     |                                          |    |     |     |     |     |     |     |     |     |     |     |     |     |     |
| YER185W                                   | Protoporphyrin uptake protein 1          | No | No  | yes | No  | No  | No  | yes | yes | yes | No  | No  | No  | No  | No  |
| YGR213C                                   | Protein RTA1                             | No | yes | No  | yes | No  | No  |
| YJR104C                                   | Superoxide dismutase                     | No | No  | No  | yes |
| YGR234W                                   | Flavoheмоprotein                         | No | No  | No  | No  | No  | No  | yes | yes | yes | No  | No  | No  | No  | No  |
| YIL053W                                   | (DL)-glycerol-3-phosphatase 1            | No | No  | yes | yes | yes | yes | yes | No  | yes | yes | yes | No  | No  | No  |
| YPR201W                                   | Arsenical-resistance protein 3           | No | No  | yes | No  | No  |
| YGL196W                                   | D-serine dehydratase                     | No | No  | No  | yes | No  | yes | yes | yes | yes | No  | yes | yes | No  | No  |
| YHR044C                                   | 2-deoxyglucose-6-phosphate phosphatase 1 | No | No  | yes | yes | yes | yes | yes | No  | yes | yes | yes | No  | No  | No  |
| YHR043C                                   | 2-deoxyglucose-6-phosphate phosphatase 2 | No | No  | yes | yes | yes | yes | yes | No  | yes | yes | yes | No  | No  | No  |
| <b>Arabinono-1,4-lactone biosynthesis</b> |                                          |    |     |     |     |     |     |     |     |     |     |     |     |     |     |
| YML086C                                   | D-arabinono-1,4-lactone oxidase          | No | yes | No  | yes |
| YMR041C                                   | D-arabinose 1-dehydrogenase              | No | No  | yes |
| <b>Chaperones</b>                         |                                          |    |     |     |     |     |     |     |     |     |     |     |     |     |     |
| YBR227C                                   | Mitochondrial clpX-like chaperone MCX1   | No | yes | No  |

|                                       |                                           |    |     |     |     |     |     |     |     |     |     |     |     |     |     |
|---------------------------------------|-------------------------------------------|----|-----|-----|-----|-----|-----|-----|-----|-----|-----|-----|-----|-----|-----|
| YMR038C                               | Superoxide dismutase 1 copper chaperone   | No | No  | No  | No  | No  | yes | No  | yes |
| <b>Nitrate metabolism</b>             |                                           |    |     |     |     |     |     |     |     |     |     |     |     |     |     |
| XP_752655                             | Nitrate transporter                       | No | No  | yes | No  | No  | No  | No  | yes |
| CAD28426                              | Nitrite reductase                         | No | No  | yes |
| AAL85636                              | Nitrate reductase                         | No | yes |
| <b>Proteases/peptidases</b>           |                                           |    |     |     |     |     |     |     |     |     |     |     |     |     |     |
| YBR286W                               | Aminopeptidase Y                          | No | No  | yes |
| YHR132C                               | Metalloprotease                           | No | No  | yes | No  | No  | No  | yes | No  |
| YIL108W                               | Zinc metalloproteinase                    | No | No  | No  | No  | No  | yes | yes | yes | yes | yes | No  | yes | No  | yes |
| <b>Aromatic amino acid metabolism</b> |                                           |    |     |     |     |     |     |     |     |     |     |     |     |     |     |
| YGL202W                               | Aromatic/amino acid aminotransferase 1    | No | No  | yes | No  |
| YHR137W                               | Aromatic amino acid aminotransferase 2    | No | No  | yes | No  |
| <b>Channels/transporters</b>          |                                           |    |     |     |     |     |     |     |     |     |     |     |     |     |     |
| YJL093C                               | Outward-rectifier potassium channel TOK1  | No | No  | yes | No  | yes | No  | No  | No  |
| YBR296C                               | Phosphate permease PHO89                  | No | No  | yes | yes | No  | yes | yes | yes | yes | yes | yes | No  | No  | yes |
| YIL023C                               | Zinc transporter YKE4                     | No | No  | No  | yes | No  | yes |
| YKL221W                               | Probable transporter MCH2                 | No | No  | yes | No  |
| <b>Mating type/cell cycle/budding</b> |                                           |    |     |     |     |     |     |     |     |     |     |     |     |     |     |
| YBR276C                               | Dual specificity protein phosphatase PPS1 | No | yes |
| YGL056C                               | Protein SDS23                             | No | No  | No  | yes |
| YBR214W                               | Protein SDS24                             | No | No  | No  | yes |
| YIL140W                               | Axial budding pattern protein 2           | No | yes | yes | yes | yes | No  | yes | No  | yes | No  | No  | No  | No  | No  |

**ER quality control**

|         |                                                             |    |    |     |     |     |     |     |     |     |     |     |     |     |     |     |
|---------|-------------------------------------------------------------|----|----|-----|-----|-----|-----|-----|-----|-----|-----|-----|-----|-----|-----|-----|
| YPL096W | Peptide-N(4)-(N-acetyl-beta-glucosaminyl)asparagine amidase | No | No | No  | No  | No  | yes | No  |
| YHR176W | Thiol-specific monooxygenase                                | No | No | yes |
| YBR015C | Alpha-1,2-mannosyltransferase MNN2                          | No | No | No  | No  | No  | No  | yes | No  |
| YJL186W | Alpha-1,2-mannosyltransferase MNN5                          | No | No | No  | No  | No  | No  | yes | No  |

**Others**

|         |                                                     |    |     |     |     |     |     |     |     |     |     |     |     |     |     |     |
|---------|-----------------------------------------------------|----|-----|-----|-----|-----|-----|-----|-----|-----|-----|-----|-----|-----|-----|-----|
| YLL057C | Alpha-ketoglutarate-dependent sulfonate dioxygenase | No | No  | yes | No  | No  |
| YDR465C | Arginine N-methyltransferase 2                      | No | yes |
| YNL229C | Transcriptional regulator URE2                      | No | No  | yes | No  | No  | No  | yes | yes |     |
| YOR388C | Formate dehydrogenase 1                             | No | yes |     |
| YDR242W | Probable amidase                                    | No | No  | yes | No  | yes |
| YMR302C | Mitochondrial escape protein 2                      | No | No  | yes |
| YJL145W | Phosphatidylinositol transfer protein SFH5          | No | No  | No  | yes |
| YLR047C | Probable ferric reductase transmembrane component 8 | No | No  | yes | No  | No  | yes | No  | No  |     |
| YLR278C | Uncharacterized transcriptional regulatory protein  | No | No  | yes | No  | No  | yes | yes | yes | yes | No  | No  | No  | No  | No  |     |
| YIL162W | Invertase 2                                         | No | No  | yes | No  | No  | yes | yes | yes | yes | No  | yes | No  | No  | No  |     |
| YDR030C | Radiation-sensitive protein 28                      | No | No  | yes | No  | yes | No  |

**Table S10.** Proteins containing a carbohydrate-binding module, carbohydrate esterases, expansin-related proteins, and glycoside hydrolases in *R. irregularis* DAOM-197198. The enzyme families are represented by their class and family number according to the Carbohydrate-Active enZYmes Database database (<http://www.cazy.org/>).

| JGI Protein ID | Defline                                                                        | CAZy module(s) |
|----------------|--------------------------------------------------------------------------------|----------------|
| 255            | Carbohydrate-Binding Module Family 13 protein                                  | CBM13          |
| 6978           | Carbohydrate-Binding Module Family 13 protein                                  | CBM13          |
| 16808          | Carbohydrate-Binding Module Family 13 protein                                  | CBM13          |
| 16818          | Carbohydrate-Binding Module Family 13 protein                                  | CBM13          |
| 63968          | Carbohydrate-Binding Module Family 13 protein                                  | CBM13          |
| 74095          | Carbohydrate-Binding Module Family 13 protein                                  | CBM13          |
| 212254         | Carbohydrate-Binding Module Family 13 protein                                  | CBM13          |
| 84949          | Carbohydrate-Binding Module Family 18 protein                                  | CBM18          |
| 45161          | Carbohydrate-Binding Module Family 18 / Carbohydrate Esterase Family 4 protein | CBM18-CE4      |
| 34561          | Carbohydrate-Binding Module Family 21 protein                                  | CBM21          |
| 335833         | Carbohydrate-Binding Module Family 48 protein                                  | CBM48          |
| 70859          | Carbohydrate-Binding Module 48 / Glycoside Hydrolase Family 13 protein         | CBM48-GH13     |
| 341482         | Carbohydrate-Binding Module Family 50 protein                                  | CBM50          |
| 348911         | Carbohydrate-Binding Module Family 50 protein                                  | CBM50          |
| 26526          | Carbohydrate Esterase Family 11 protein                                        | CE11           |
| 20441          | Carbohydrate Esterase Family 4 protein                                         | CE4            |
| 25223          | Carbohydrate Esterase Family 4 protein                                         | CE4            |
| 89895          | Carbohydrate Esterase Family 4 protein                                         | CE4            |
| 205470         | Carbohydrate Esterase Family 4 protein                                         | CE4            |
| 343321         | Carbohydrate Esterase Family 4 protein                                         | CE4            |
| 345355         | Carbohydrate Esterase Family 4 protein                                         | CE4            |
| 346280         | Carbohydrate Esterase Family 4 protein                                         | CE4            |
| 335796         | Carbohydrate Esterase Family 9 protein                                         | CE9            |
| 58723          | Distantly related to plant expansins                                           | EXPN           |
| 70056          | Distantly related to plant expansins                                           | EXPN           |
| 82162          | Distantly related to plant expansins                                           | EXPN           |
| 84458          | Distantly related to plant expansins                                           | EXPN           |
| 346642         | Distantly related to plant expansins                                           | EXPN           |
| 27716          | Glycoside Hydrolase Family 108 protein                                         | GH108          |
| 81947          | Glycoside Hydrolase Family 125 protein                                         | GH125          |
| 272160         | Glycoside Hydrolase Family 125 protein                                         | GH125          |
| 82975          | Glycoside Hydrolase Family 13 protein                                          | GH13           |
| 94949          | Glycoside Hydrolase Family 13 protein                                          | GH13           |
| 256840         | Glycoside Hydrolase Family 13 protein                                          | GH13           |
| 135429         | Glycoside Hydrolase Family 15 protein                                          | GH15           |
| 40274          | Glycoside Hydrolase Family 18 protein                                          | GH18           |
| 30711          | Glycoside Hydrolase Family 19 protein                                          | GH19           |
| 86511          | Glycoside Hydrolase Family 20 protein                                          | GH20           |



|               |                                       |      |
|---------------|---------------------------------------|------|
| <b>91889</b>  | Glycoside Hydrolase Family 23 protein | GH23 |
| <b>10338</b>  | Glycoside Hydrolase Family 24 protein | GH24 |
| <b>92943</b>  | Glycoside Hydrolase Family 24 protein | GH24 |
| <b>324701</b> | Glycoside Hydrolase Family 24 protein | GH24 |
| <b>326114</b> | Glycoside Hydrolase Family 24 protein | GH24 |
| <b>35329</b>  | Glycoside Hydrolase Family 25 protein | GH25 |
| <b>92712</b>  | Glycoside Hydrolase Family 26 protein | GH26 |
| <b>19913</b>  | Glycoside Hydrolase Family 27 protein | GH27 |
| <b>137379</b> | Glycoside Hydrolase Family 27 protein | GH27 |
| <b>77961</b>  | Glycoside Hydrolase Family 31 protein | GH31 |
| <b>340187</b> | Glycoside Hydrolase Family 31 protein | GH31 |
| <b>268674</b> | Glycoside Hydrolase Family 35 protein | GH35 |
| <b>348856</b> | Glycoside Hydrolase Family 35 protein | GH35 |
| <b>19827</b>  | Glycoside Hydrolase Family 36 protein | GH36 |
| <b>314624</b> | Glycoside Hydrolase Family 37 protein | GH37 |
| <b>342201</b> | Glycoside Hydrolase Family 38 protein | GH38 |
| <b>19084</b>  | Glycoside Hydrolase Family 47 protein | GH47 |
| <b>33551</b>  | Glycoside Hydrolase Family 47 protein | GH47 |
| <b>40562</b>  | Glycoside Hydrolase Family 47 protein | GH47 |
| <b>230436</b> | Glycoside Hydrolase Family 47 protein | GH47 |
| <b>342669</b> | Glycoside Hydrolase Family 47 protein | GH47 |
| <b>64734</b>  | Glycoside Hydrolase Family 5 protein  | GH5  |
| <b>76762</b>  | Glycoside Hydrolase Family 5 protein  | GH5  |
| <b>338770</b> | Glycoside Hydrolase Family 5 protein  | GH5  |
| <b>33915</b>  | Glycoside Hydrolase Family 63 protein | GH63 |
| <b>35188</b>  | Glycoside Hydrolase Family 63 protein | GH63 |
| <b>29553</b>  | Glycoside Hydrolase Family 9 protein  | GH9  |
| <b>45754</b>  | Glycoside Hydrolase Family 9 protein  | GH9  |
| <b>318916</b> | Glycoside Hydrolase Family 9 protein  | GH9  |
| <b>32509</b>  | Glycoside Hydrolase Family 91 protein | GH91 |

**Table S11.** The most highly upregulated transcripts in *Rhizophagus irregularis*-*Medicago truncatula* symbiotic roots

|            | FPKM      | FPKM      | FPKM             |                                |                  |
|------------|-----------|-----------|------------------|--------------------------------|------------------|
| Protein ID | Spores 2d | Spores 9d | <i>in planta</i> | InterPro domain                | Secreted protein |
| 344204*    | 0.0       | 0.0       | 24600            | specific protein               | S                |
| 21945*     | 0.0       | 0.0       | 5609             | hypothetical protein           | S                |
| 22556      | 0.0       | 0.0       | 4040             | specific protein               |                  |
| 343985     | 0.0       | 0.0       | 3493             | specific protein               | S                |
| 54643*     | 0.0       | 0.2       | 3163             | GPR1/FUN34/yaaH                |                  |
| 7716       | 0.0       | 2.0       | 2948             | specific protein               | S                |
| 347085     | 0.0       | 27.9      | 2887             | specific protein               | S                |
| 336160     | 0.0       | 0.0       | 2686             | specific protein               |                  |
| 334000     | 0.0       | 0.0       | 2659             | specific protein               |                  |
| 248224     | 0.0       | 0.0       | 2524             | specific protein               | S                |
| 30459*     | 0.0       | 0.0       | 2169             | alpha/beta hydrolase           |                  |
| 11377      | 0.0       | 0.0       | 1716             | specific protein               | S                |
| 347932     | 0.0       | 0.0       | 1491             | specific protein               |                  |
| 6890       | 0.0       | 0.1       | 1422             | specific protein               | S                |
| 11536*     | 0.0       | 0.2       | 1373             | specific protein               | S                |
| 24444      | 0.0       | 0.0       | 1318             | specific protein               | S                |
| 326976     | 0.0       | 0.0       | 1309             | specific protein               |                  |
| 96997      | 0.0       | 0.0       | 1123             | specific protein               |                  |
| 347485     | 0.0       | 7.5       | 1105             | specific protein               |                  |
| 330295*    | 0.0       | 0.0       | 1057             | peptidase A1                   | S                |
| 2831       | 0.0       | 0.0       | 1052             | hypothetical protein           |                  |
| 30684*     | 0.0       | 0.0       | 1014             | cytochrome P450                |                  |
| 337599*    | 0.0       | 0.0       | 950              | hypothetical protein           | S                |
| 61727      | 0.0       | 0.0       | 911              | cytochrome P450                |                  |
| 322915*    | 0.0       | 0.0       | 887              | specific protein               | S                |
| 343687*    | 0.0       | 7.2       | 882              | specific protein               |                  |
| 348622     | 0.0       | 0.0       | 871              | MD-2-related lipid-recognition | S                |
| 349607*    | 0.0       | 0.0       | 857              | specific protein               |                  |
| 326387*    | 0.0       | 0.0       | 847              | specific protein               |                  |
| 348750*    | 0.0       | 0.0       | 841              | specific protein               |                  |
| 85283*     | 0.0       | 0.2       | 771              | high mobility group box        |                  |
| 6745       | 0.0       | 0.0       | 750              | esterase                       | S                |
| 3358       | 0.0       | 0.0       | 742              | specific protein               | S                |
| 24442      | 0.0       | 0.0       | 682              | specific protein               | S                |
| 182238     | 0.0       | 3.6       | 663              | hypothetical protein           | S                |
| 21350*     | 0.0       | 0.0       | 553              | cytochrome P450                |                  |
| 65037*     | 0.0       | 0.1       | 526              | major facilitator superfamily  |                  |
| 84430*     | 0.0       | 0.4       | 507              | specific protein               |                  |
| 307589*    | 0.0       | 0.0       | 488              | specific protein               |                  |
| 81390*     | 0.0       | 0.1       | 473              | GPR1/FUN34/yaaH                |                  |

Upregulation in *R. irregularis*-*M. truncatula* symbiotic roots (= *in planta*) is assessed by comparing RNA-Seq transcript profiles to those from germinated spores at two and nine days (= Spores 2d and Spores 9d). Mycorrhizal roots were sampled from plantlets in contact with *R. irregularis* for two weeks. Values are the means of three biological replicates. They are expressed as FPKM, i.e. fragments per kilobase of exon per million RNA-Seq fragments mapped to *R. irregularis* genes (54). Based on the statistical analysis, a gene was considered significantly upregulated if it met two criteria: (1) False Discovery Rate (FDR)-adjusted *p*-value cutoff of 0.05 and (2) mycorrhiza versus germinated spore fold change  $\geq 2$ . See Supplementary Information section 1.1 and 1.7 for details. \* transcripts expressed in microdissected arbuscules obtained as describe in (62). Abbreviations: GPR1/FUN34/yaaH: a transmembrane protein related to ammonia exporter; S, proteins with a predicted signal peptide; specific protein, protein encoded by an orphan gene with no hit in the GenBank nr database.

**Table S12.** Most abundant InterPro (IPR) domains in symbiosis up-regulated genes in the *Rhizophagus irregularis-Medicago truncatula* symbiosis. Predicted proteins are ranked by the abundance of IPR categories

| IPR       | Description                                     | #   |
|-----------|-------------------------------------------------|-----|
| No IPR    | No IPR ( <i>Rhizophagus</i> -specific proteins) | 430 |
| IPR001128 | Cytochrome P450                                 | 36  |
| IPR000719 | Protein kinase, core                            | 30  |
| IPR013069 | BTB/POZ                                         | 16  |
| IPR011701 | Major facilitator superfamily MFS-1             | 12  |
| IPR006597 | Sel1-like                                       | 11  |
| IPR001199 | Cytochrome b5                                   | 10  |
| IPR013216 | Methyltransferase type 11                       | 10  |
| IPR009071 | High mobility group box, HMG                    | 8   |
| IPR001841 | Zinc finger, RING-type                          | 8   |
| IPR001395 | Aldo/keto reductase                             | 7   |
| IPR002213 | UDP-glucuronosyl/UDP-glucosyltransferase        | 6   |
| IPR007087 | Zinc finger, C2H2-type                          | 6   |
| IPR002403 | Cytochrome P450, E-class, group IV              | 6   |
| IPR000209 | Peptidase S8 and S53, subtilisin                | 6   |
| IPR003172 | MD-2-related lipid-recognition                  | 5   |
| IPR006025 | Peptidase M, neutral zinc metallopeptidases     | 5   |
| IPR004046 | Glutathione S-transferase, C-terminal           | 5   |
| IPR002198 | Short-chain dehydrogenase/reductase             | 5   |
| IPR003439 | ABC transporter-like                            | 5   |
| IPR000073 | Alpha/beta hydrolase fold-1                     | 5   |
| IPR001849 | Pleckstrin-like                                 | 5   |
| IPR003100 | Argonaute and Dicer protein, PAZ                | 5   |
| IPR001752 | Kinesin, motor region                           | 5   |
| IPR008030 | NmrA-like                                       | 5   |
| IPR002347 | Glucose/ribitol dehydrogenase                   | 5   |
| IPR010257 | Fatty acid desaturase                           | 5   |
| IPR007855 | RNA-dependent RNA polymerase                    | 5   |
| IPR001254 | Peptidase S1 and S6, chymotrypsin/Hap           | 5   |
| IPR001680 | WD40 repeat                                     | 4   |
| IPR003877 | SPla/Ryanodine receptor SPRY                    | 4   |
| IPR002921 | Lipase, class 3                                 | 4   |
| IPR004088 | K Homology, type 1                              | 4   |
| IPR001117 | Multicopper oxidase, type 1                     | 4   |
| IPR013094 | Alpha/beta hydrolase fold-3                     | 4   |
| IPR002401 | Cytochrome P450, E-class, group I               | 4   |
| IPR006603 | Cystinosin/ERS1p repeat                         | 4   |
| IPR001087 | Lipase, GDSL                                    | 4   |
| IPR001757 | ATPase, P-type                                  | 4   |
| IPR000910 | High mobility group box, HMG1/HMG2              | 4   |
| IPR014778 | Myb, DNA-binding                                | 4   |
| IPR009003 | Peptidase                                       | 4   |

Upregulation in *R. irregularis-M. truncatula* symbiotic roots (= *in planta*) is assessed by comparing RNA-Seq transcript profiles to those from germinated spores at two and nine days (= Spores 2d and Spores 9d). Mycorrhizal roots were sampled from plantlets in contact with *R. irregularis* for two weeks. Based on the statistical analysis, a gene was considered significantly upregulated if it met two criteria: (1) FDR-adjusted *p*-value cutoff of 0.05 and (2) mycorrhiza versus germinated spore fold change  $\geq 2$ ; 1,068 genes (4.7% of the 22,647 expressed genes) showed an upregulated expression. See Supplementary Information section 1.1 and 1.7 for details.

**Table S13.** Features of proteins with a predicted signal peptide.

| <b>Protein types/Motif</b>                             | <b>Number</b> | <b>Number<br/>induced in<br/><i>planta</i></b> |
|--------------------------------------------------------|---------------|------------------------------------------------|
| Proteins with a signal peptide                         | 376           | 79                                             |
| Small secreted proteins (SSPs) < 150 AA                | 153           | 29                                             |
| Small cysteine-rich SSPs (SCRs: <150 AA, Cyst >3%)     | 59            | 12                                             |
| Secreted proteins with sequence identity in GenBank nr | 154           | 38                                             |
| Secreted proteins with IPR domains                     | 101           | 27                                             |
| Secreted proteins with a GPI anchor                    | 14            | 4                                              |
| SSP with nuclear localization signals (NLS)            | 17            | 3                                              |
| SSP with effector signature motifs *                   |               |                                                |
| SSP with [LI]xAR motif                                 | 1             | 0                                              |
| SSP with [YFW]xC motif                                 | 1             | 0                                              |
| SSP with G[IFY][ALST]R motif                           | 2             | 1                                              |
| SSP with R[X]LR motif                                  | 0             | 0                                              |

\* Only proteins with no motif identified after their sequences have been permuted 100 times by using the SHUFFLESEQ software in EMBOSS (<http://emboss.sourceforge.net/>) have been counted

**Table S14.** Upregulated transcripts coding for putative secreted proteins in *Rhizophagus-Medicago* symbiosis

| Protein ID | Description                    | Length (AA) | # Cyst | GPI    |     |     | FPKM      |           |                       |
|------------|--------------------------------|-------------|--------|--------|-----|-----|-----------|-----------|-----------------------|
|            |                                |             |        | anchor | NLS | SCR | Spores 2d | Spores 9d | FPKM <i>in planta</i> |
| 344204     | specific protein               | 120         | 0      |        |     |     | 0.0       | 0.0       | 246000                |
| 21945      | hypothetical protein           | 275         | 10     |        |     |     | 0.0       | 0.0       | 5609                  |
| 343985     | specific protein               | 52          | 2      |        |     | SCR | 0.0       | 0.0       | 3493                  |
| 7716       | specific protein               | 71          | 7      |        |     | SCR | 0.0       | 2.0       | 2948                  |
| 347085     | specific protein               | 94          | 6      |        |     | SCR | 0.0       | 27.9      | 2887                  |
| 248224     | specific protein               | 122         | 4      |        |     | SCR | 0.0       | 0.0       | 2524                  |
| 11377      | specific protein               | 71          | 9      |        |     | SCR | 0.0       | 0.0       | 1716                  |
| 6890       | specific protein               | 159         | 4      |        |     |     | 0.0       | 0.1       | 1422                  |
| 11536      | specific protein               | 154         | 4      |        |     |     | 0.0       | 0.2       | 1373                  |
| 24444      | specific protein               | 208         | 8      |        |     |     | 0.0       | 0.0       | 1318                  |
| 330295     | Peptidase A1                   | 374         | 5      |        |     |     | 0.0       | 0.0       | 1057                  |
| 337599     | hypothetical protein           | 151         | 3      |        |     |     | 0.0       | 0.0       | 950                   |
| 322915     | specific protein               | 163         | 6      |        |     |     | 0.0       | 0.0       | 887                   |
| 348622     | MD-2-related lipid-recognition | 167         | 4      |        |     |     | 0.0       | 0.0       | 871                   |
| 6745       | Esterase                       | 99          | 1      |        |     |     | 0.0       | 0.0       | 750                   |
| 3358       | specific protein               | 128         | 2      |        |     |     | 0.0       | 0.0       | 742                   |
| 24442      | specific protein               | 209         | 8      |        |     |     | 0.0       | 0.0       | 682                   |
| 182238     | hypothetical protein           | 102         | 6      |        |     | SCR | 0.0       | 3.6       | 663                   |
| 30117      | specific protein               | 134         | 4      |        |     |     | 0.0       | 1.6       | 435                   |
| 342269     | specific protein               | 149         | 2      |        |     |     | 0.0       | 4.1       | 425                   |
| 349450     | MD-2-related lipid-recognition | 151         | 4      |        |     |     | 0.0       | 0.0       | 382                   |
| 23049      | Peptidase S1 and S6            | 295         | 5      |        |     |     | 0.0       | 0.0       | 370                   |
| 29400      | Peptidase S1 and S6            | 291         | 7      |        |     |     | 0.0       | 0.0       | 367                   |
| 176092     | specific protein               | 147         | 3      |        |     |     | 0.0       | 0.3       | 350                   |
| 9388       | specific protein               | 167         | 3      |        |     |     | 0.0       | 0.0       | 301                   |
| 18077      | Peptidase                      | 315         | 4      |        |     |     | 0.0       | 0.0       | 298                   |
| 26749      | specific protein               | 154         | 3      |        |     |     | 0.0       | 1.7       | 291                   |
| 347635     | specific protein               | 60          | 2      |        |     | SCR | 0.0       | 0.5       | 251                   |
| 4655       | specific protein               | 111         | 5      |        |     | SCR | 0.0       | 0.0       | 249                   |
| 12926      | specific protein               | 205         | 8      |        |     |     | 0.0       | 0.0       | 205                   |
| 30130      | specific protein               | 134         | 4      |        |     |     | 0.0       | 0.0       | 168                   |
| 322704     | specific protein               | 221         | 10     |        |     |     | 0.1       | 0.0       | 1114                  |
| 27343      | MD-2-related lipid-recognition | 170         | 4      |        |     |     | 0.2       | 0.0       | 2205                  |
| 18384      | hypothetical protein           | 213         | 5      |        | NLS |     | 0.0       | 0.0       | 138                   |
| 6820       | Multicopper oxidase            | 622         | 8      |        |     |     | 0.0       | 0.0       | 117                   |
| 84850      | specific protein               | 297         | 4      |        |     |     | 0.0       | 0.0       | 95                    |
| 18190      | Peptidase A1                   | 378         | 5      |        |     |     | 0.0       | 0.0       | 84                    |
| 4928       | specific protein               | 196         | 9      |        |     |     | 0.0       | 0.1       | 68                    |
| 34922      | specific protein               | 214         | 9      |        |     |     | 0.0       | 0.0       | 63                    |
| 28370      | Peptidase                      | 315         | 4      |        |     |     | 0.0       | 0.0       | 61                    |
| 321933     | Peptidase S1 and S6            | 298         | 6      |        |     |     | 0.0       | 0.0       | 31                    |
| 320886     | Peptidase M                    | 383         | 3      |        |     |     | 0.2       | 0.1       | 470                   |
| 25518      | specific protein               | 137         | 4      |        |     |     | 0.5       | 2.0       | 1069                  |
| 22081      | Peptidase S1 and S6            | 271         | 5      |        |     |     | 0.1       | 0.0       | 136                   |
| 349254     | hypothetical protein           | 245         | 6      |        |     |     | 0.6       | 0.5       | 783                   |
| 8744       | specific protein               | 71          | 8      |        |     | SCR | 3.0       | 0.0       | 2229                  |
| 337108     | hypothetical protein           | 256         | 4      |        |     |     | 0.5       | 0.1       | 258                   |
| 334310     | hypothetical protein           | 135         | 3      |        |     |     | 1.6       | 13.3      | 608                   |
| 31657      | specific protein               | 119         | 6      |        |     | SCR | 0.3       | 0.3       | 102                   |
| 2724       | hypothetical protein           | 451         | 7      |        |     |     | 0.1       | 0.0       | 22                    |

|        |                                |     |    |     |     |       |       |      |
|--------|--------------------------------|-----|----|-----|-----|-------|-------|------|
| 336365 | specific protein               | 132 | 13 |     | SCR | 0.4   | 4.2   | 57   |
| 342539 | hypothetical protein           | 172 | 8  |     |     | 0.5   | 0.4   | 67   |
| 10008  | specific protein               | 121 | 2  |     |     | 3.7   | 4.2   | 443  |
| 345761 | specific protein               | 150 | 4  |     |     | 18.8  | 261.0 | 2144 |
| 31003  | specific protein               | 100 | 0  |     |     | 7.5   | 58.2  | 536  |
| 343800 | hypothetical protein           | 228 | 0  | GPI |     | 63.6  | 47.6  | 4070 |
| 36449  | specific protein               | 95  | 1  |     |     | 3.0   | 1.2   | 82   |
| 29380  | MD-2-related lipid-recognition | 164 | 4  |     |     | 1.8   | 7.0   | 49   |
| 19507  | Metallophosphoesterase         | 354 | 3  |     |     | 1.9   | 0.9   | 24   |
| 349684 | specific protein               | 179 | 9  |     |     | 3.9   | 6.4   | 42   |
| 340872 | Carbonic anhydrase             | 240 | 2  |     |     | 13.6  | 3.5   | 150  |
| 3298   | hypothetical protein           | 178 | 9  | GPI |     | 37.3  | 86.5  | 344  |
| 33189  | Kelch repeat                   | 312 | 1  |     |     | 14.2  | 36.4  | 130  |
| 214362 | hypothetical protein           | 172 | 4  |     |     | 5.1   | 12.3  | 44   |
| 319075 | specific protein               | 138 | 8  |     | SCR | 1.9   | 2.4   | 16   |
| 161262 | Glyoxal oxidase                | 562 | 6  |     |     | 3.9   | 0.8   | 32   |
| 216408 | Multicopper oxidase            | 615 | 8  |     |     | 9.3   | 8.5   | 73   |
| 225359 | specific protein               | 121 | 0  |     |     | 412.7 | 859.4 | 3228 |
| 25979  | specific protein               | 80  | 0  |     |     | 919.9 | 970.7 | 6609 |
| 342887 | hypothetical protein           | 205 | 2  |     |     | 4.7   | 36.6  | 29   |
| 8806   | Metallophosphoesterase         | 349 | 3  |     |     | 16.4  | 24.0  | 85   |
| 31827  | Alpha/beta hydrolase           | 354 | 1  |     | NLS | 5.7   | 8.4   | 27   |
| 103897 | Multicopper oxidase            | 139 | 2  |     |     | 14.9  | 11.3  | 70   |
| 346611 | Carbonic anhydrase             | 245 | 3  |     |     | 61.1  | 19.8  | 284  |
| 347071 | hypothetical protein           | 262 | 10 | GPI |     | 274.1 | 294.7 | 1252 |
| 339235 | Polysaccharide deacetylase     | 487 | 18 |     |     | 140.1 | 160.2 | 609  |
| 342046 | hypothetical protein           | 479 | 21 |     |     | 14.8  | 7.4   | 50   |
| 342775 | Heat shock protein             | 522 | 7  |     | NLS | 72.8  | 62.7  | 214  |

Upregulation in *R. irregularis-M. truncatula* symbiotic roots (= *in planta*) is assessed by comparing RNA-Seq transcript profiles to those from germinated spores at two and nine days (= Spores 2d and Spores 9d). Mycorrhizal roots were sampled from plantlets in contact with *R. irregularis* for two weeks. Based on the statistical analysis, a gene was considered significantly upregulated if it met two criteria: (1) FDR-adjusted *p*-value cutoff of 0.05 and (2) mycorrhiza versus germinated spore fold change  $\geq 2$ ; 1,068 genes (4.7% of the 22,647 expressed genes) showed an upregulated expression. See Supplementary Information section 1.1 and 1.7 for details. Abbreviations: AA, amino acids; Cyst, number of cysteine residues; FPKM, fragments per kilobase of exon per million RNA-Seq fragments mapped; GPI, GPI anchor; NLS, nuclear targeting signal; SCR, small cystein-rich proteins; specific protein, lineage-specific proteins.

**Table S15.** PFAM domains identified in proteins with a predicted signal peptide

| <b>PFAM domain</b>                                                      | <b>#</b> |
|-------------------------------------------------------------------------|----------|
| No Pfam domain                                                          | 274      |
| PF01344 Kelch motif                                                     | 21       |
| PF02221 ML domain                                                       | 15       |
| PF00082 Subtilase family                                                | 9        |
| PF07732 Multicopper oxidase                                             | 5        |
| PF00026 Eukaryotic aspartyl protease                                    | 5        |
| PF01522 Polysaccharide deacetylase                                      | 5        |
| PF07250 Glyoxal oxidase N-terminus                                      | 4        |
| PF02298 Plastocyanin-like domain                                        | 3        |
| PF00149 Calcineurin-like phosphoesterase                                | 3        |
| PF00188 Cysteine-rich secretory protein family                          | 2        |
| PF10342 Developmentally Regulated MAPK Interacting Protein              | 2        |
| PF00194 Eukaryotic-type carbonic anhydrase                              | 2        |
| PF01565 FAD binding domain                                              | 2        |
| PF00098 Zinc knuckle                                                    | 1        |
| PF05938 Plant self-incompatibility protein S1                           | 1        |
| PF01593 Flavin containing amine oxidoreductase                          | 1        |
| PF04185 Phosphoesterase family                                          | 1        |
| PF02815 MIR domain                                                      | 1        |
| PF00085: Thioredoxin                                                    | 1        |
| PF02265 S1/P1 Nuclease                                                  | 1        |
| PF02128 Fungalysin metallopeptidase                                     | 1        |
| PF00201 UDP-glucuronosyl and UDP-glucosyl transferase                   | 1        |
| PF00450 Serine carboxypeptidase S10                                     | 1        |
| PF03572 Peptidase family S41                                            | 1        |
| PF01391 Collagen triple helix repeat                                    | 1        |
| PF03200 Mannosyl oligosaccharide glucosidase                            | 1        |
| PF00187 Chitin recognition protein                                      | 1        |
| PF00023 Ankyrin repeat                                                  | 1        |
| PF04389 Peptidase family M28                                            | 1        |
| PF03254 Xyloglucan fucosyltransferase                                   | 1        |
| PF06814 Lung seven transmembrane receptor                               | 1        |
| PF05577 Serine carboxypeptidase S28                                     | 1        |
| PF07719 Tetratricopeptide repeat                                        | 1        |
| PF10137 Predicted nucleotide-binding protein containing TIR-like domain | 1        |
| PF00561 alpha/beta hydrolase fold                                       | 1        |

**Table S16.** Upregulated transcripts coding for CAZymes in *Rhizophagus-Medicago* symbiosis

| Protein_ID | CAZy module | FPKM Spores 2d | FPKM Spores 9d | FPKM <i>in planta</i> | Description                                      |
|------------|-------------|----------------|----------------|-----------------------|--------------------------------------------------|
| 348911     | CBM50       | 0.3            | 27.6           | 3933.1                | Peptidoglycan-binding LysM                       |
| 75100      | GT1         | 2.1            | 0.3            | 286.5                 | UDP-glucuronosyl/UDP-glucosyltransferase         |
| 70859      | CBM48-GH13  | 102.4          | 155.2          | 223.3                 | $\alpha$ -amylase                                |
| 340699     | GT3         | 79.4           | 220.5          | 215.6                 | Glycogen synthase                                |
| 344899     | GT3         | 51.2           | 68.7           | 210.6                 | Glycogen synthase                                |
| 45161      | CBM18-CE4   | 0.0            | 0.0            | 144.0                 | Chitin-binding motif-chitin deacetylase          |
| 334983     | GT15        | 54.6           | 42.7           | 135.5                 | Glycolipid 2- $\alpha$ -mannosyltransferase      |
| 121158     | GT2         | 20.2           | 13.9           | 135.3                 | Chitin synthase                                  |
| 66145      | GT1         | 0.8            | 0.5            | 112.1                 | UDP-glucuronosyl/UDP-glucosyltransferase         |
| 253398     | GT39        | 47.9           | 39.7           | 109.7                 | Dol-P-Man: protein $\alpha$ -mannosyltransferase |
| 337139     | GT1         | 9.4            | 4.6            | 101.8                 | UDP-glucuronosyl/UDP-glucosyltransferase         |
| 167899     | GT2         | 5.3            | 3.1            | 94.8                  | Chitin synthase                                  |
| 348856     | GH35        | 18.0           | 20.0           | 88.4                  | Exo- $\beta$ -glucosaminidase                    |
| 326114     | GH24        | 0.9            | 2.3            | 77.1                  | Lysozyme                                         |

Upregulation in *R. irregularis-M. truncatula* symbiotic roots (= *in planta*) was assessed by comparing RNA-Seq transcript profiles to those from germinated spores at two and nine days (= Spores 2d and Spores 9d). Mycorrhizal roots were sampled from plantlets in contact with *R. irregularis* for two weeks. Based on the statistical analysis, a gene was considered significantly upregulated if it met two criteria: (1) FDR-adjusted *p*-value cutoff of 0.05 and (2) mycorrhiza versus germinated spore fold change  $\geq 2$ . FPKM, fragments per kilobase of exon per million RNA-Seq fragments mapped. Only CAZyme genes with an expression level *in planta* >70 FPKM were listed.



**Table S17.** Predicted MATA-HMG domain-containing proteins found in *R. irregularis* DAOM-197198 genome. The sequence accession number of the best reciprocal BLAST hit (BRH), the BLAST e-value, the predicted protein domain name, and the protein description of the first blast hit retrieved from the NCBI nr database are listed for each *R. irregularis* MAT-HMG gene. Green cells indicate the presence of these genes in isolates A4, B3, and C2 of *R. irregularis*, while red cells indicate their absence. See Supplementary Information section 1.1 and 1.6 for details and Fig. S19.

| Genomic location | A4 | B3 | C2 | Accession #    | BLAST e-value | Protein domain | Protein description      |
|------------------|----|----|----|----------------|---------------|----------------|--------------------------|
| scaffold 6161    |    |    |    | BAE94382.1     | 3,00E-03      | MATA_H<br>MG   | MAT1-2-1                 |
| scaffold 11528   |    |    |    | EFY86728.1     | 8,00E-05      | MATA_H<br>MG   | HMG transcription factor |
| scaffold 24332 1 |    |    |    | EFX05114.1     | 2,00E-05      | MATA_H<br>MG   | HMG box protein          |
| scaffold 5899 2  |    |    |    | XP_003007798.1 | 4,00E-06      | MATA_H<br>MG   | predicted protein        |
| scaffold 5899 1  |    |    |    | EGF99649.1     | 9,00E-07      | MATA_H<br>MG   | hypothetical protein     |
| scaffold 25287   |    |    |    | ABC68485.1     | 3,00E-03      | MATA_H<br>MG   | MAT1-2-1                 |
| scaffold 10252   |    |    |    | XP_002564591.1 | 4,00E-05      | MATA_H<br>MG   | Hypothetical             |
| scaffold 23703   |    |    |    | CCE33026.1     | 3,00E-10      | MATA_H<br>MG   | mating type gene         |
| scaffold 24420   |    |    |    | AFA26123.1     | 4,00E-10      | MATA_H<br>MG   | SexM                     |
| scaffold 15128   |    |    |    | EIW55118.1     | 5,00E-04      | MATA_H<br>MG   | HMG box protein          |
| scaffold 8926    |    |    |    | AAT48651.1     | 1,00E-04      | MATA_H<br>MG   | MAT1-2                   |
| scaffold 9271 2  |    |    |    | CAD62166.1     | 3,00E-04      | MATA_H<br>MG   | HMG box protein          |
| scaffold 22967   |    |    |    | AFM85245.1     | 1,00E-17      | MATA_H<br>MG   | MatMc                    |
| scaffold 13782 2 |    |    |    | CCM00606.1     | 2,00E-03      | MATA_H<br>MG   | predicted protein        |
| scaffold 11572   |    |    |    | EHK50111.1     | 6,00E-03      | MATA_H<br>MG   | hypothetical protein     |
| scaffold 14496   |    |    |    | ABB83710.1     | 3,00E-10      | MATA_H<br>MG   | MAT1-2                   |
| scaffold 6509    |    |    |    | CAD62166.1     | 2,00E-10      | MATA_H<br>MG   | HMG box protein          |
| scaffold 13073   |    |    |    | CCM01306.1     | 2,00E-02      | MATA_H<br>MG   | predicted protein        |
| scaffold 18730   |    |    |    | CAD62166.1     | 3,00E-04      | MATA_H<br>MG   | HMG box protein          |
| scaffold 11099   |    |    |    | EIW63176.1     | 2,00E-09      | MATA_H<br>MG   | Hypothetical             |
| scaffold 24332 2 |    |    |    | CCA67490.1     | 5,00E-11      | MATA_H<br>MG   | Hypothetical             |
| scaffold 8838    |    |    |    | AEI83491.1     | 3,00E-05      | MATA_H<br>MG   | MAT1-2                   |
| scaffold 25670   |    |    |    | CCF52951.1     | 2,00E-11      | MATA_H<br>MG   | Prf1                     |
| scaffold 13782 1 |    |    |    | XP_002152469.1 | 1,00E-04      | MATA_H<br>MG   | MAT1-2-1                 |
| scaffold 10425   |    |    |    | EIW55066.1     | 1,80E+00      | MATA_H<br>MG   | hypothetical protein     |
| scaffold 5393 2  |    |    |    | NP_595867.1    | 5,00E-05      | MATA_H<br>MG   | mc 2                     |
| scaffold 9387    |    |    |    | CCM01306.1     | 8,00E-05      | MATA_H<br>MG   | Hypothetical             |

|                  |                |          |                   |                                         |
|------------------|----------------|----------|-------------------|-----------------------------------------|
| scaffold 23044   | GAA93066.1     | 2,40E+00 | MATA_H<br>MG      | Hypothetical                            |
| scaffold 1489    | XP_003855030.1 | 4,00E-04 | MATA_H<br>MG      | Hypothetical                            |
| scaffold 26230   | AAK83344.1     | 1,00E-07 | MATA_H<br>MG      | MAT1-1-3                                |
| scaffold 24639   | XP_002488738.1 | 2,00E-06 | MATA_H<br>MG      | MAT1-2-1                                |
| scaffold 18459 1 | XP_003029891.1 | 3,00E-05 | MATA_H<br>MG      | Hypothetical                            |
| scaffold 26755   | CCA72393.1     | 1,00E-04 | MATA_H<br>MG      | Hypothetical                            |
| scaffold 20035   | AET35404.1     | 9,30E-02 | MATA_H<br>MG      | SexP                                    |
| scaffold 23687   | CAI59768.2     | 2,00E-03 | MATA_H<br>MG      | MAT1-2-1                                |
| scaffold 2943    | CAD62166.1     | 2,00E-09 | MATA_H<br>MG      | HMG box protein                         |
| scaffold 26602   | ABC68485.1     | 3,00E-07 | MATA_H<br>MG      | MAT1-2-1                                |
| scaffold 13111   | EFY86728.1     | 3,00E-07 | MATA_H<br>MG      | HMG transcription factor                |
| scaffold 6122    | BAE93596.1     | 5,00E-03 | MATA_H<br>MG      | MAT1-1-3                                |
| scaffold 8872    | AFP89369.1     | 5,80E-02 | MATA_H<br>MG      | MAT1-2-1                                |
| scaffold 7299    | XP_003297060.1 | 1,00E-16 | MATA_H<br>MG      | Hypothetical                            |
| scaffold 23005   | EGD75508.1     | 3,40E-02 | MATA_H<br>MG      | Hypothetical                            |
| scaffold 4041    | CCA72393.1     | 1,00E-04 | MATA_H<br>MG      | Hypothetical                            |
| scaffold 24024   | AAB28876.1     | 7,50E-01 | MATA_H<br>MG      | matMc                                   |
| scaffold 28019   | CCF38267.1     | 1,60E-02 | MATA_H<br>MG      | HMG box protein                         |
| scaffold 21404   | ABX27909.1     | 9,00E-06 | MATA_H<br>MG      | SexM                                    |
| scaffold 22418   | AEA29200.1     | 9,60E-02 | MATA_H<br>MG      | MAT1-1-2                                |
| scaffold 8935    | EJT79613.1     | 2,00E-03 | MATA_H<br>MG      | Hypothetical                            |
| scaffold 26574   | EGY15843.1     | 8,00E-06 | MATA_H<br>MG      | Hypothetical                            |
| scaffold 22770   | AFQ90566.1     | 1,00E-03 | MATA_H<br>MG      | MAT1-2-1                                |
| scaffold 18308   | EMC98166.1     | 2,00E-05 | MATA_H<br>MG      | MAT1-2-1                                |
| scaffold 10137   | ACJ70020.1     | 5,00E-06 | MATA_H<br>MG-box  | mating type protein 1-2-1               |
| scaffold 10207   | ACV60399.1     | 8,00E-04 | MATA_H<br>MG-box  | MAT1-2-1                                |
| scaffold 10219   | EIW55066.1     | 2,00E-06 | MATA_H<br>HMG-box | hypothetical protein                    |
| scaffold 1059    | AEB33764.1     | 3,00E-05 | MATA_H<br>MG-box  | HMG domain mating-type protein MAT1-2-1 |
| scaffold 10953   | CCF38267.1     | 6,00E-08 | MATA_H<br>MG-box  | HMG box protein                         |
| scaffold 11056   | CAI59768.2     | 3,00E-10 | MATA_H<br>MG-box  | mating-type protein MAT1-2-1            |
| scaffold 11982 1 | EIW55066.1     | 3,00E-07 | MATA_H<br>HMG-box | hypothetical protein                    |
| scaffold 11982 2 | EAU36401.1     | 4,00E-06 | MATA_H<br>MG-box  | predicted protein                       |
| scaffold 12031   | CAB63345.1     | 1,00E-06 | MATA_H<br>MG-box  | mating-type protein Mat a-1             |

|                  |  |             |          |                  |                                       |
|------------------|--|-------------|----------|------------------|---------------------------------------|
| scaffold 12373   |  | AAT48651.1  | 6,00E-06 | MATA_H<br>MG-box | mating-type protein MAT1-2            |
| scaffold 12516   |  | AAB28876.1  | 9,00E-06 | MATA_H<br>MG-box | mat-Mc product                        |
| scaffold 13738   |  | EFQ94844.1  | 6,00E-11 | MATA_H<br>MG-box | hypothetical protein                  |
| scaffold 13912   |  | ADJ38503.1  | 4,00E-05 | MATA_H<br>MG-box | MAT1-2-1                              |
| scaffold 14082   |  | NP_595867.1 | 9,00E-14 | MATA_H<br>MG-box | m-specific polypeptide mc 2           |
| scaffold 14378   |  | ADD92633    | 1,00E-04 | HMG-box          | MAT1-2-1                              |
| scaffold 1469    |  | EIM88371    | 3,00E-06 | HMG-box          | hypothetical protein                  |
| scaffold 15072   |  | EHK50111.1  | 2,00E-05 | HMG-box          | hypothetical protein                  |
| scaffold 15202   |  | ABC68485.1  | 3,00E-04 | MATA_H<br>MG-box | MAT1-2-1                              |
| scaffold 15346 1 |  | EGP92003.1  | 2,00E-14 | MATA_H<br>MG-box | high-mobility group protein           |
| scaffold 15346 2 |  | EEY15877.1  | 5,00E-07 | HMG-box          | predicted protein                     |
| scaffold 16096   |  | BAE93753    | 4,00E-05 | MATA_H<br>MG-box | mating type gene                      |
| scaffold 16420   |  | EIW55066.1  | 3,00E-07 | HMG-box          | hypothetical protein                  |
| scaffold 16771   |  | EGF76365    | 2,00E-07 | HMG-box          | hypothetical protein                  |
| scaffold 17668   |  | EIW61440.1  | 7,00E-13 | HMG-box          | hypothetical protein                  |
| scaffold 17872   |  | EHA21813    | 9,00E-08 | MATA_H<br>MG-box | hypothetical protein                  |
| scaffold 18118   |  | CAD59614.3  | 7,00E-15 | MATA_H<br>MG-box | putative mating type protein<br>MAT-2 |
| scaffold 18459 2 |  | EFI94988.1  | 3,00E-08 | HMG-box          | hypothetical protein                  |
| scaffold 18713   |  | ADB28879.1  | 1,00E-07 | MATA_H<br>MG-box | MAT1-2-1                              |
| scaffold 18989   |  | BAE93759.1  | 1,00E-06 | MATA_H<br>MG-box | mating type gene                      |
| scaffold 19131   |  | ADJ38503    | 2,00E-09 | HMG-box          | MAT1-2-1                              |
| scaffold 19402   |  | EEA20220.1  | 1,00E-25 | MATA_H<br>MG-box | HMG box transcriptional<br>regulator  |
| scaffold 19862   |  | EED11557.1  | 2,00E-08 | MATA_H<br>MG-box | mating type protein MAT1-<br>2-1      |
| scaffold 20416   |  | CAI59768.2  | 2,00E-05 | MATA_H<br>MG-box | mating-type protein MAT1-<br>2-1      |
| scaffold 20689   |  | AAK83344.1  | 3,00E-12 | MATA_H<br>MG-box | mating type protein MAT1-<br>1-3      |
| scaffold 20827   |  | CAI45464.3  | 1,00E-13 | HMG-box          | mating type protein                   |
| scaffold 20832   |  | BAA28611    | 7,00E-22 | HMG-box          | MAT-2 protein                         |
| scaffold 21001   |  | EFX04658.1  | 1,00E-05 | MATA_H<br>MG-box | hmg box protein                       |
| scaffold 21210   |  | EFY88585.1  | 3,00E-08 | MATA_H<br>MG-box | MAT1-2-1 like protein                 |
| scaffold 2189    |  | BAA28611.1  | 5,00E-09 | HMG-box          | MAT-2 protein                         |
| scaffold 21949   |  | CAB63346.1  | 3,00E-05 | MATA_H<br>MG-box | mating-type protein Mat a-1           |
| scaffold 22340   |  | XP_661271.1 | 4,00E-13 | MATA_H<br>MG-box | hypothetical protein                  |
| scaffold 22341   |  | EAW24898.1  | 8,00E-04 | MATA_H<br>MG-box | HMG box protein                       |
| scaffold 22419   |  | AAL28013.1  | 3,00E-05 | MATA_H<br>MG-box | mating-type protein Mat a-1           |
| scaffold 22834   |  | ABX27909.1  | 1,00E-05 | HMG-box          | SexM                                  |
| scaffold 22855   |  | A49103      | 9,00E-08 | MATA_H<br>MG-box | mat-Mc                                |

|                 |                |          |                   |                                         |
|-----------------|----------------|----------|-------------------|-----------------------------------------|
| scaffold 22982  | AAQ82722.1     | 1,00E-03 | MATA_H<br>MG-box  | matMc                                   |
| scaffold 22994  | XP_002152469.1 | 1,00E-16 | MATA_H<br>MG-box  | mating type protein MAT1-2-1            |
| scaffold 230    | BAE93753.1     | 3,00E-06 | MATA_H<br>MG-box  | mating type gene                        |
| scaffold 23137  | EGU84400.1     | 4,00E-07 | MATA_H<br>MG-box  | hypothetical protein                    |
| scaffold 23489  | BAA28611.1     | 1,00E-19 | HMG-box<br>MATA_H | MAT-2 protein                           |
| scaffold 23584  | A49103         | 1,00E-02 | MG-box<br>MATA_H  | unnamed protein product                 |
| scaffold 23866  | EEA19532.1     | 1,00E-08 | MATA_H<br>MG-box  | mating type protein MAT1-2-1            |
| scaffold 23936  | EIE88156.1     | 1,00E-12 | MATA_H<br>MG-box  | hypothetical protein                    |
| scaffold 23954  | EFY86728       | 2,00E-09 | MATA_H<br>MG-box  | HMG box transcription factor            |
| scaffold 23995  | CCF38267.1     | 3,00E-07 | MATA_H<br>MG-box  | HMG box protein                         |
| scaffold 24083  | CAA30481.1     | 2,00E-15 | MATA_H<br>MG-box  | unnamed protein product                 |
| scaffold 24153  | EFQ29499.1     | 9,00E-15 | MATA_H<br>MG-box  | HMG box protein                         |
| scaffold 24446  | AEB33764.1     | 7,00E-07 | MATA_H<br>MG-box  | HMG domain mating-type protein MAT1-2-1 |
| scaffold 24771  | EGF84214.1     | 4,00E-12 | HMG-box<br>MATA_H | hypothetical protein                    |
| scaffold 24949  | CAI59768.2     | 2,00E-05 | MATA_H<br>MG-box  | mating-type protein MAT1-2-1            |
| scaffold 25118  | CAD59612.3     | 2,00E-10 | MATA_H<br>MG-box  | putative mating type protein MAT-2      |
| scaffold 25720  | AEB33764.1     | 2,00E-08 | MATA_H<br>MG-box  | HMG domain mating-type protein MAT1-2-1 |
| scaffold 26025  | AEA29202.1     | 2,00E-06 | HMG-box           | mating type protein 1-1-2               |
| scaffold 26382  | ABN11480.1     | 7,00E-15 | HMG-box<br>MATA_H | STE11-like transcription factor         |
| scaffold 26760  | A49103         | 5,00E-10 | MG-box            | mat-Mc product                          |
| scaffold 27041  | EIW65046.1     | 8,00E-09 | HMG-box<br>MATA_H | HMG-box                                 |
| scaffold 28122  | AAK83344.1     | 1,00E-12 | MATA_H<br>MG-box  | mating type protein MAT1-1-3            |
| scaffold 2948   | CAB63226.1     | 2,00E-07 | MATA_H<br>MG-box  | mating-type protein Mat a-1             |
| scaffold 3337   | ACR78246.1     | 7,00E-08 | MATA_H<br>MG-box  | MAT1-1-3                                |
| scaffold 3371   | BAD01149.1     | 1,00E-04 | MATA_H<br>MG-box  | MAT1-2-1                                |
| scaffold 4373   | NP_595867.1    | 8,00E-18 | MATA_H<br>MG-box  | m-specific polypeptide mc 2             |
| scaffold 4671   | ACV60399.1     | 8,00E-06 | MATA_H<br>MG-box  | MAT1-2-1                                |
| scaffold 4700   | XP_001645206.1 | 8,00E-10 | HMG-box<br>MATA_H | hypothetical protein                    |
| scaffold 4807   | A49103         | 1,00E-04 | MG-box            | mat-Mc                                  |
| scaffold 5230   | EGP90006.1     | 4,00E-06 | HMG-box           | hypothetical protein                    |
| scaffold 5393 1 | XP_001230155.1 | 4,00E-10 | HMG-box<br>MATA_H | hypothetical protein                    |
| scaffold 5653   | EAU35789.1     | 8,00E-14 | MATA_H<br>MG-box  | predicted protein                       |
| scaffold 6025   | EED11557.1     | 1,00E-05 | MATA_H<br>MG-box  | mating type protein MAT1-2-1            |
| scaffold 6032   | AEA29202.1     | 3,00E-08 | HMG-box           | mating type protein 1-1-2               |

|                |  |                |          |                         |                                            |
|----------------|--|----------------|----------|-------------------------|--------------------------------------------|
| scaffold 6084  |  | GAA95608.1     | 1,00E-04 | HMG-box                 | hypothetical protein                       |
| scaffold 6363  |  | AEB33764.1     | 4,00E-06 | MATA_H<br>MG-box        | HMG domain mating-type<br>protein MAT1-2-1 |
| scaffold 6674  |  | AFA26123.1     | 4,00E-07 | MATA_H<br>MG-box        | SexM                                       |
| scaffold 6688  |  | EAL92951.2     | 1,00E-06 | MATA_H<br>MG-box        | mating type protein MAT1-<br>2-1           |
| scaffold 7661  |  | GAA98854.1     | 2,00E-08 | HMG-box                 | hypothetical protein                       |
| scaffold 7897  |  | AEI72616.1     | 7,00E-07 | MATA_H<br>MG-box        |                                            |
| scaffold 8367  |  | EIW55118.1     | 1,00E-11 | HMG-box                 | mating type A-1-3 HMG1/2                   |
| scaffold 8757  |  | EAQ86935.1     | 1,00E-15 | MATA_H<br>MG-box        | HMG box protein                            |
| scaffold 8838  |  | EEA19532.1     | 7,00E-09 | MATA_H<br>MG-box        | hypothetical protein                       |
| scaffold 95 1  |  | BAD72610.2     | 5,00E-12 | MATA_H<br>MG-box        | mating type protein MAT1-<br>2-1           |
| scaffold 95 2  |  | BAE93748.1     | 5,00E-12 | MATA_H<br>MG-box        | MAT1-1-3                                   |
| scaffold 9511  |  | AAF00498       | 1,00E-05 | MATA_H<br>MG-box        | mating type gene                           |
| scaffold 9528  |  | EED82531.1     | 2,00E-05 | MATA_H<br>MG-box        | MAT2-1                                     |
| scaffold 21103 |  | XP_003958640.1 | 1,00E-06 | HMG-box                 | predicted protein                          |
| scaffold 17607 |  | AET35422.1     | 2,00E-03 | MATA_H<br>MG            | Hypothetical                               |
| scaffold 13559 |  | XP_003334333.1 | 4,00E-14 | HMG-box<br>MATA_H<br>MG | SexP                                       |
|                |  |                |          |                         | Hypothetical                               |

**Figures S1 to S20**

**Figure S1.** Strategy used for assembling the Sanger, 454, Illumina and PacBio genomic reads from *R. irregularis* DAOM-197198, the Illumina RNA sequences from *R. irregularis* DAOM-197198, and the annotation procedures. The so-called ‘high confidence’ gene models are those supported by RNA-Seq expression data or having a sequence similarity with known genes in the databases. Bacterial sequences were filtered as described in Fig. S20. N50: the length N for which 50% of all bases are in a sequence of length  $L < N$ . Mb, megabase; kb, kilobase. Spores DAOM: germinated spores from DAOM-197198; Spores C2: germinated spores from *R. irregularis* C2; Spores *R. diaph.*: germinated spores from *R. diaphanum*; *In Planta* DAOM: *R. irregularis* DAOM197198-*Medicago truncatula* symbiotic roots.

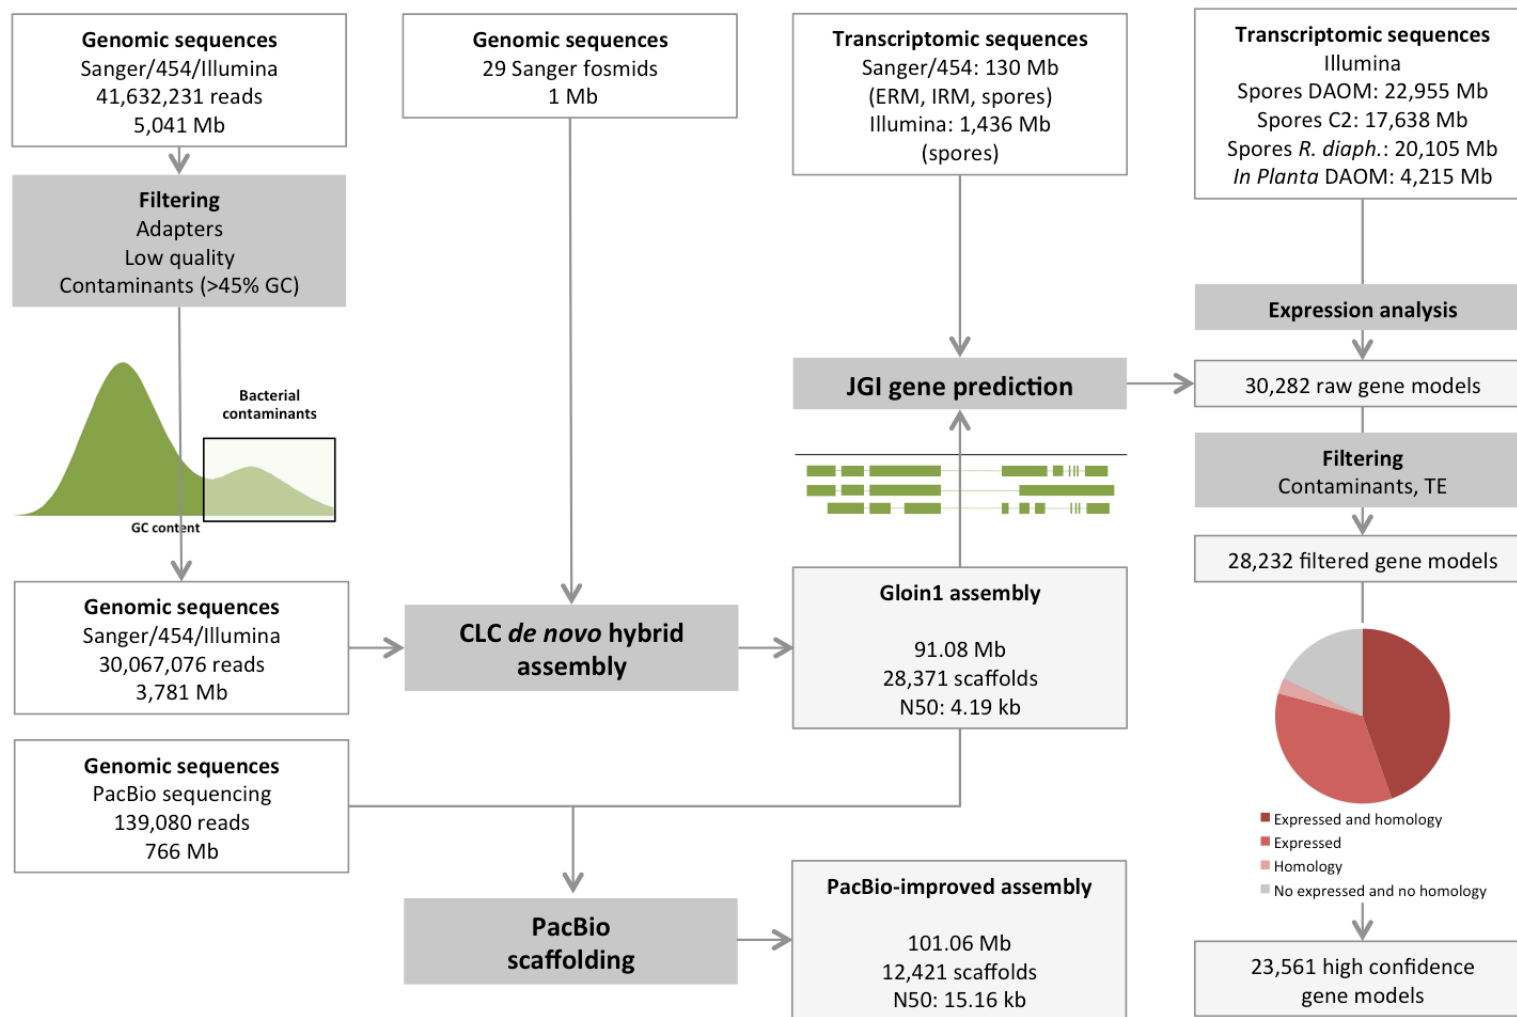

**Figure S2.** Sequence coverage of the *R. irregularis* DAOM19-7198 genome assemblies. Scaffold sequence length *versus* sequencing average coverage for the Gloin1 and PacBio-improved Gloin1 assemblies.

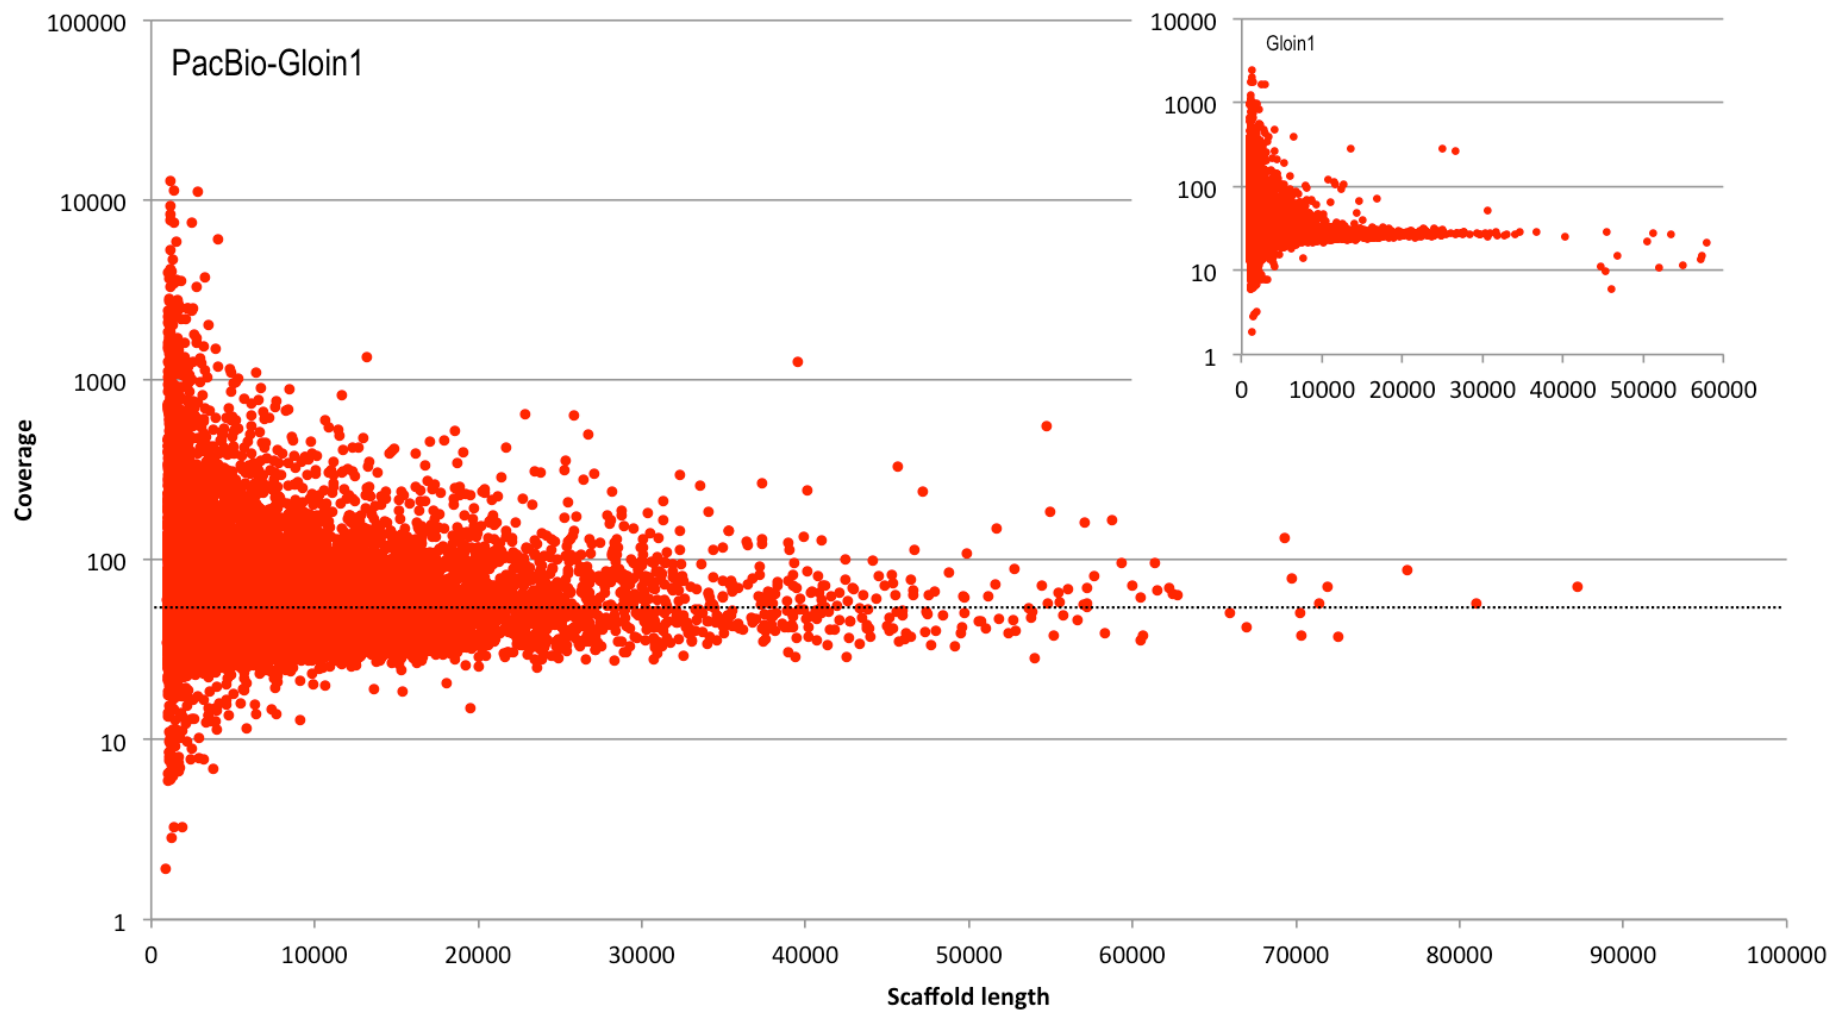



**Figure S3.** Macrosynteny between the three largest scaffolds of the PacBio-improved Gloin1 genome assembly (right panel) and scaffolds of the genome assembly Gloin1 (left panel). PacBio-improved Gloin1 genome assembly scaffolds are depicted by the colored blocks and Gloin1 scaffolds are represented by gray blocks. Comparison between the two assemblies was performed with MUMMER. Only regions larger than 1 kb and percent identity higher than 97% are connected with links of colors matching those used for the PacBio-improved Gloin1 genome assembly scaffolds. The location of protein-coding regions (blue), repeats regions (red) and gaps regions (grey) are showed on innermost circle. Outermost circle represents GC content based on a sliding window of 100 bp (red > 40% ; green < 20% ; midline: 33%).

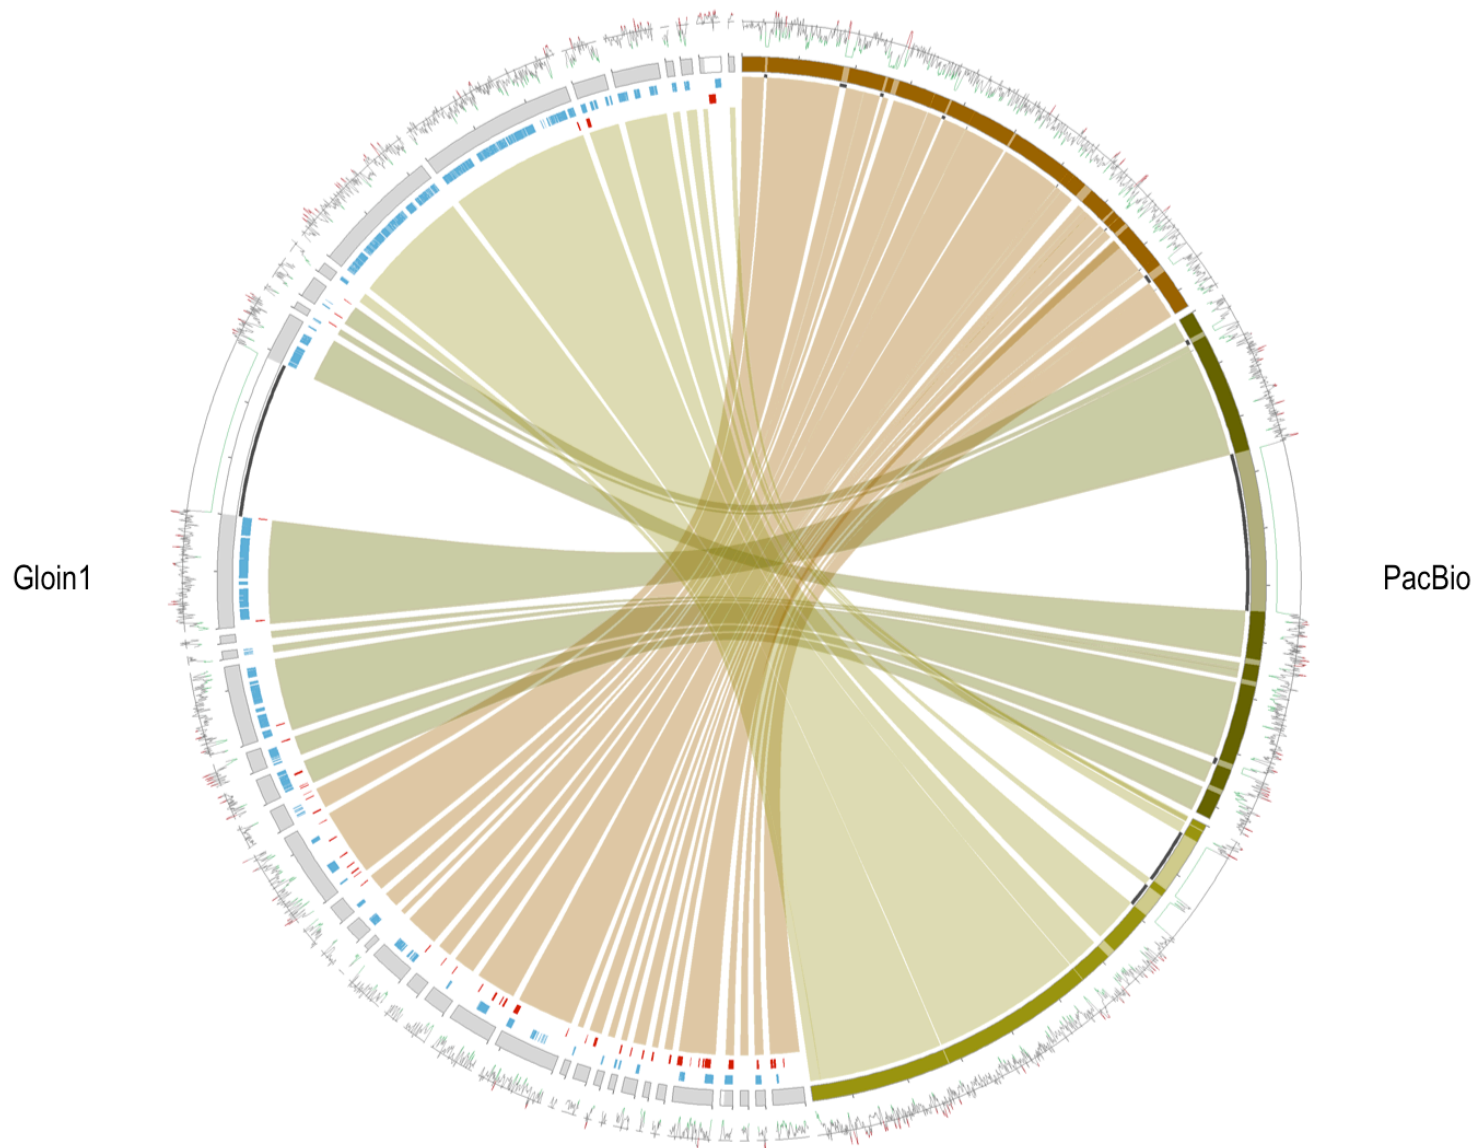

**Figure S4.** Locations of protein-coding genes, Polinton transposable elements and LTR retrotransposons on *R. irregularis* fosmid. **(a)** the 29 fosmid regions which aligned to Gloin1 scaffolds are highlighted in dark grey. **(b)** Locations of gene models (blue), LTRs retrotransposons (dark red), LTR retrotransposons fragments (light red) and Polinton transposable elements (green). **(c)** Genome read coverage (scale from 0 to 100). **(d)** Transcriptome read coverage, germinated spores (scale from 0 to 1000). **(e)** Transcriptome read coverage, *in planta* (scale from 0 to 200). **(f)** GC content based on a sliding window of 100 bp (red > 40% ; green < 20% ; midline: 33%).

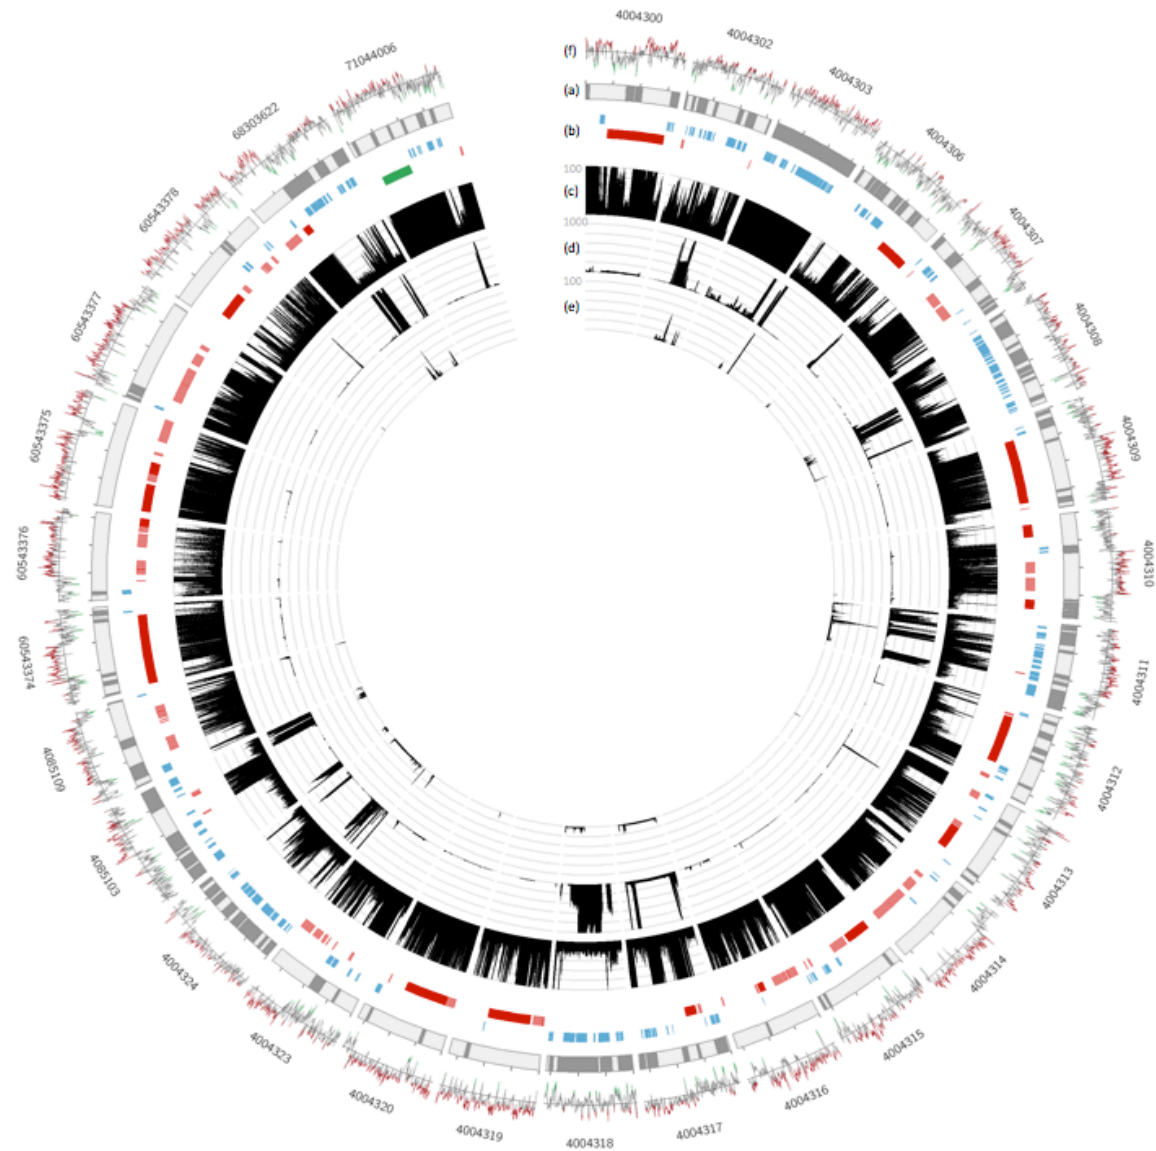

**Figure S5.** Features of the largest scaffolds from the *R. irregularis* genome assembly. **(A)** scaffold\_1649. **(B)** scaffold\_2742. **(a)** GC content based on a sliding window of 100 bp (red > 33%, green < 33%). **(b)** Location of predicted protein-coding gene models. **(c)** Location of repeated elements. **(d)** Genome read coverage (scale from 0 to 100). **(e)** Location of genomic SNPs. **(f)** Expressed gene read coverage, germinated spores (scale from 0 to 1000). **(g)** Expressed gene read coverage, *in planta* (scale from 0 to 100). **(h)** Location of SNPs in expressed DAOM-197198 genes identified using mapped RNA-Seq reads from DAOM-197198 germinated spores. **(i)** Location of SNPs in expressed genes, RNA-Seq reads from C2 germinated spores. **(j)** Location of SNPs in expressed genes, RNA-Seq reads from *R. diaphanum* germinated spores.

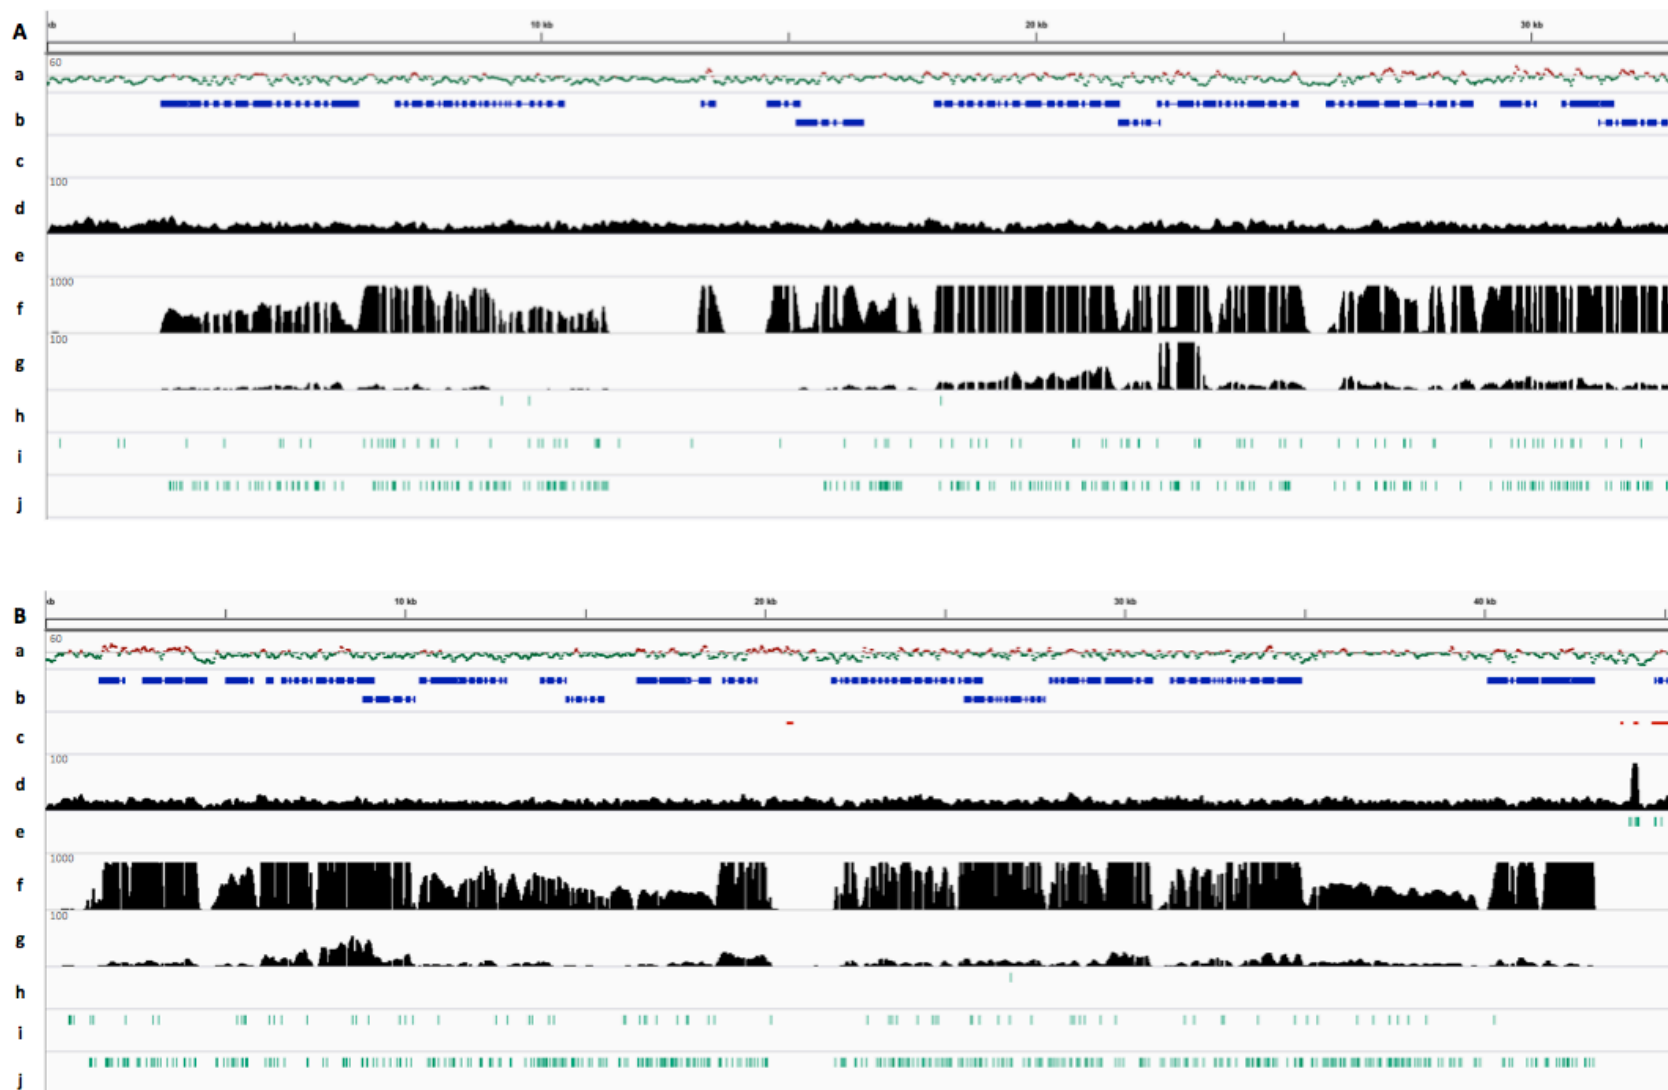

**Figure S6.** Size of the *R. irregularis* DAOM-197198 genome based on *k*-mer analysis. Distribution of 17-mer frequency in the raw Illumina genomic reads is shown. The peak depth is at 15X. The peak of 17-mer frequency (M) in reads is correlated with the real sequencing depth (N), read length (L), and kmer length (K), their relations can be expressed in a experienced formula:  $M = N * (L - K + 1) / L$ . Then, we divided the total sequence length by the real sequencing depth and obtained an estimated genome size of 153 Mb.

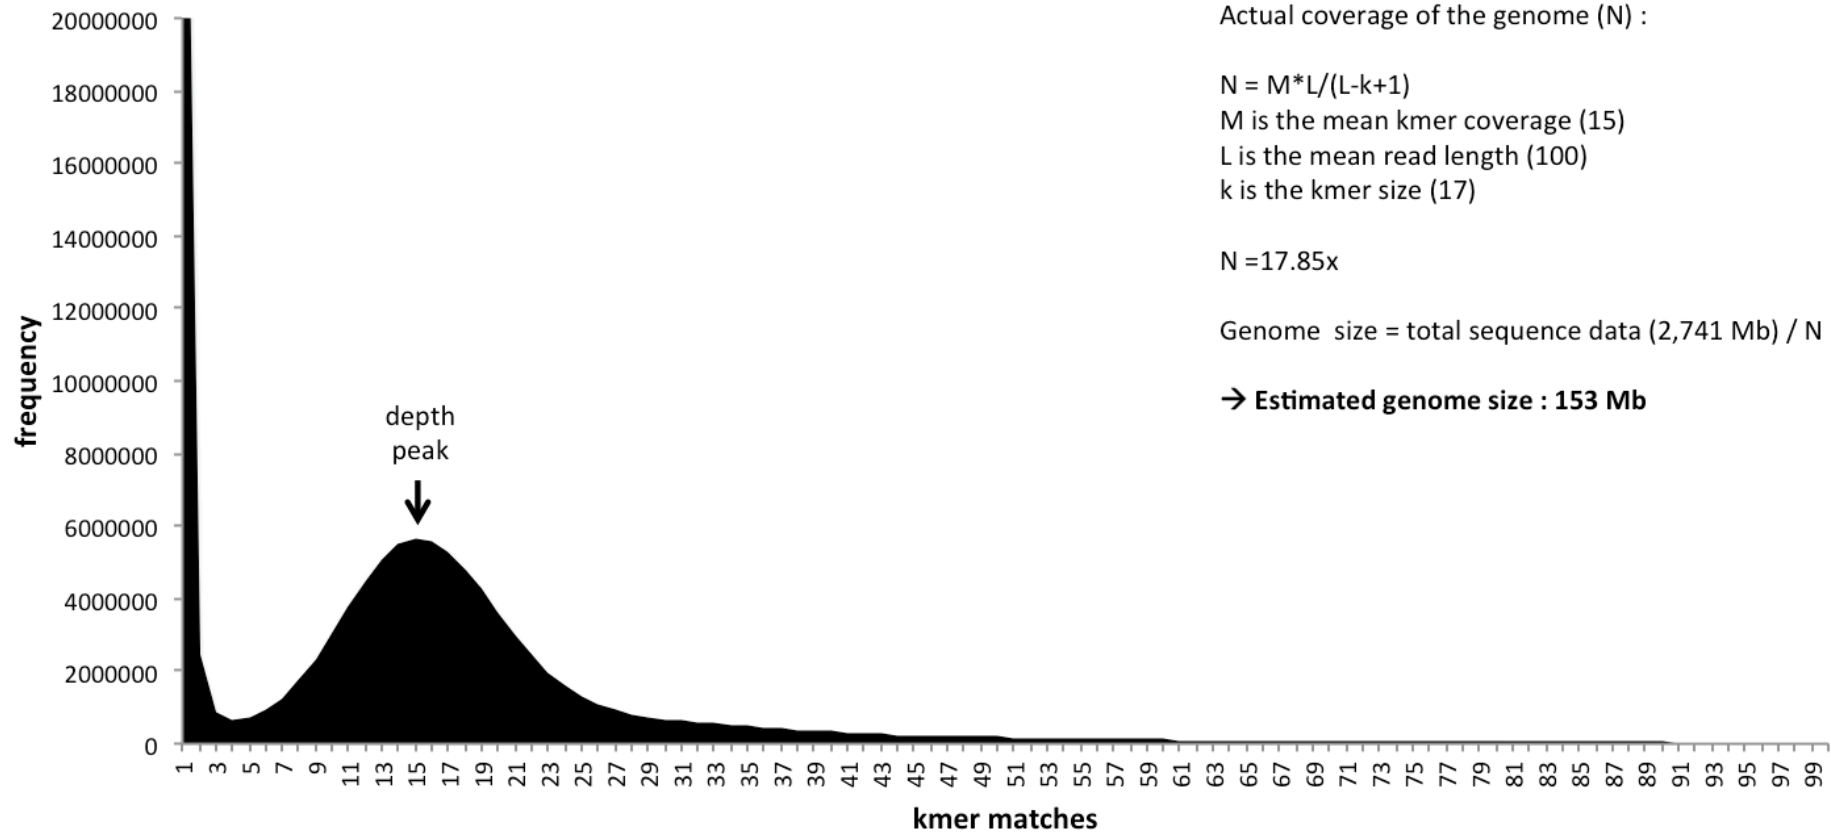

**Figure S7.** Venn diagram showing the number of SNPs identified in the *R. irregularis* DAOM-197198 genome by mapping Illumina RNA-Seq reads from *R. irregularis* DAOM-197198 transcriptome (8,643 SNPs), *R. irregularis* C2 transcriptome (5,144 SNPs) or *R. diaphanum* MUCL43196 (4,469 SNPs) and SNPs shared between isolates. Only 291 SNPs are shared by all isolates.

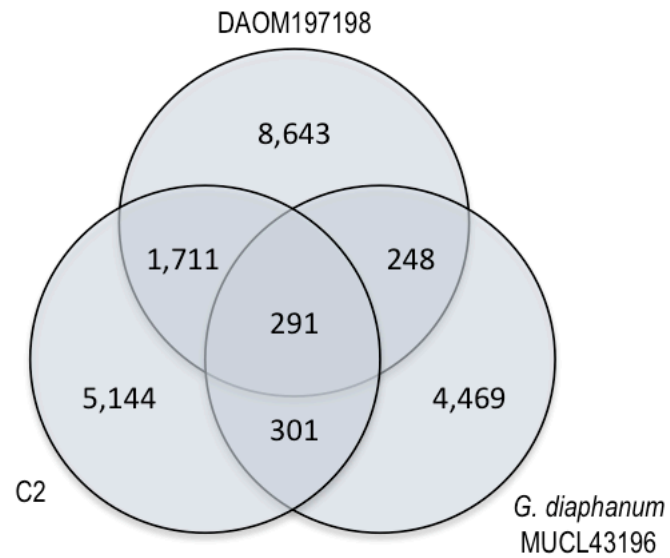

**Figure S8.** The distribution of duplication age (as measured by numbers of synonymous substitutions) of the *R. irregularis* paralogs. **(A)** Scaled normal probability density function (pdf) plot for each component detected by EMMIX and **(B)** histogram of the  $K_s$  values and the different components, where y-axis is the number of duplication nodes located in the  $K_s$  range of the corresponding bin.

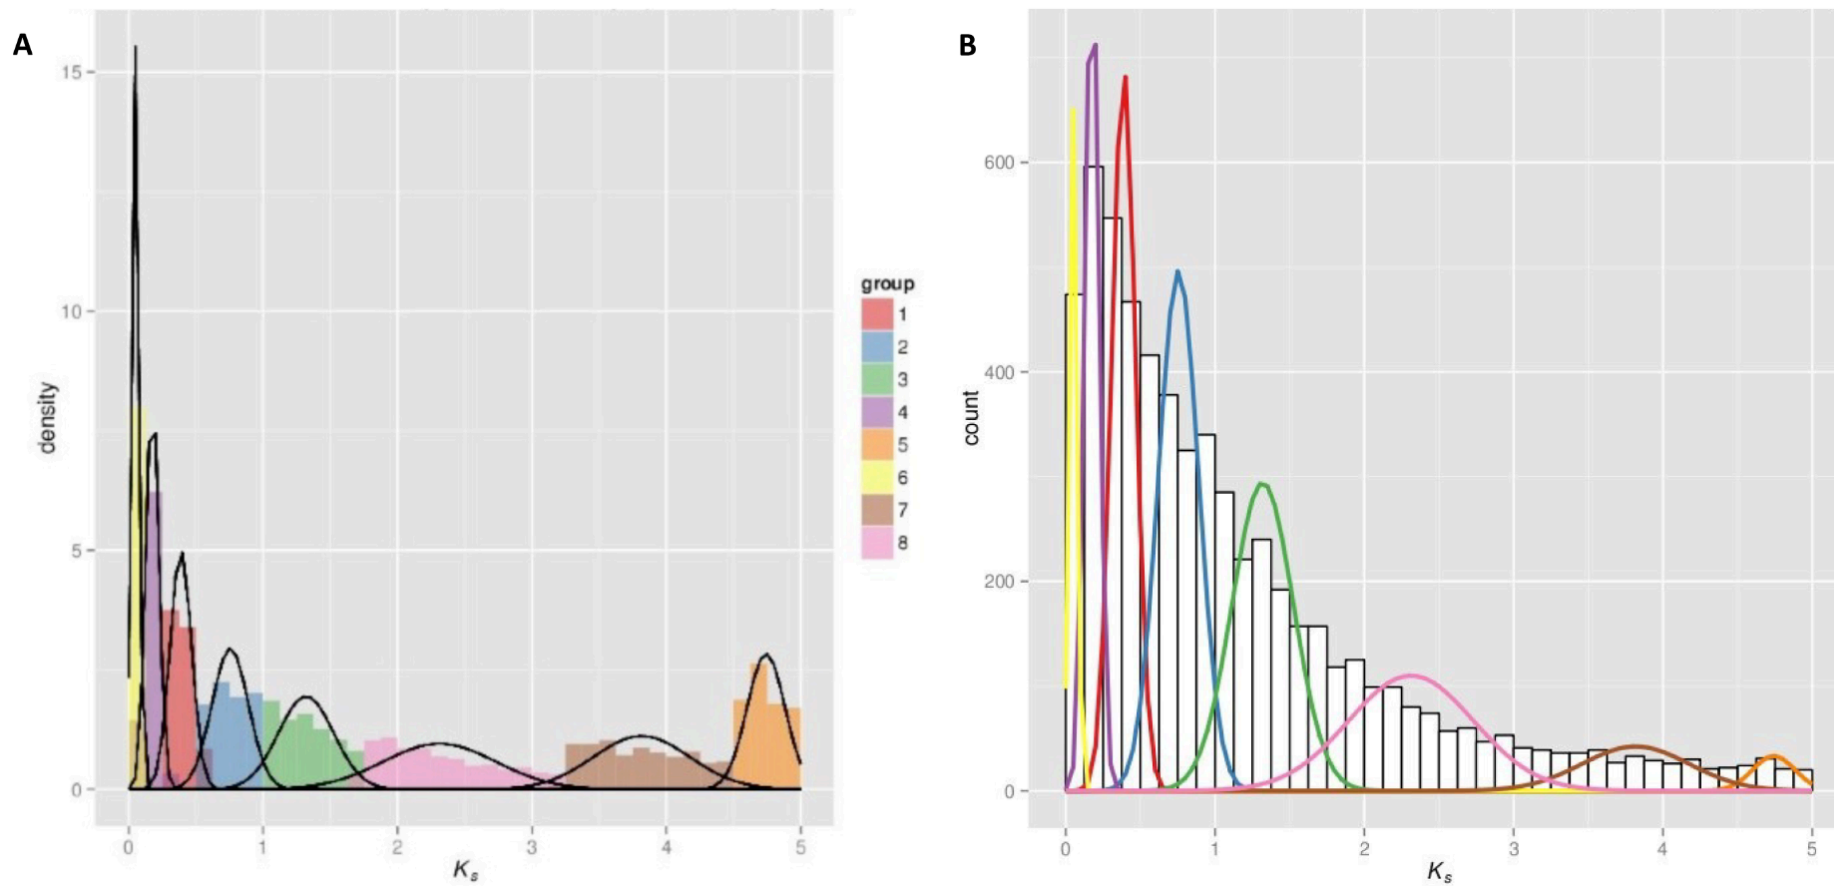

**Figure S9.** Duplicated paralogs in the *R. irregularis* genome are enriched for genes annotated to contribute to biological processes related to phosphorus metabolism and signaling via phosphorylation (metabolism and phosphorylation). Fisher's exact test based on the GO annotation for each of the 8 identified duplication groups are showed in Figure S8. The x-axis of the plots has the  $-\log(q\text{-value})$  of each identified term. Only over-represented terms are shown, whereas plots with under-represented terms can be downloaded from the INRA Rhizophagus web portal at: <http://mycor.nancy.inra.fr/IMGC/GlomusGenome/index3.html>. The number of genes participating in the different groups are 3,074 genes for group 1 (A), 5,015 for group 2 (B), 6,543 for group 3 (C), 1,764 for group 4 (D), 611 for group 5 (E), 700 for group 6 (F), 2,338 for group 7 (G) and 7,024 genes for group 8 (H). A series of tables listing the distribution of protein IDs for each GO categories, including all phosphorus-related terms and the kinases only (GO:0004672, protein kinase activity) for each group of paralogs, can be downloaded from the INRA *Rhizophagus* web portal at: <http://mycor.nancy.inra.fr/IMGC/GlomusGenome/index3.html>.

**A.**

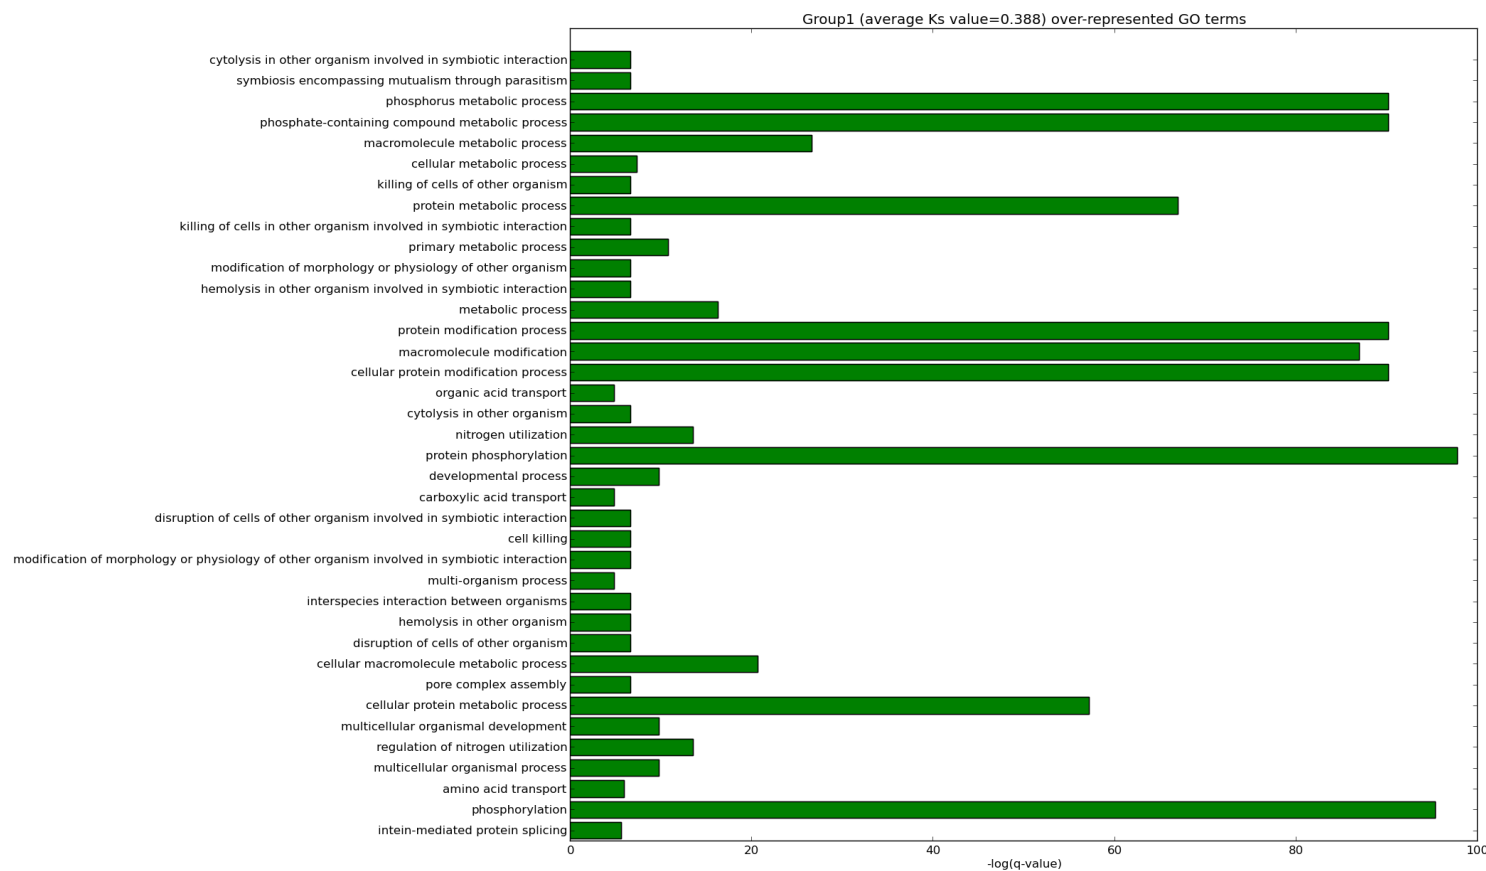

**B.**

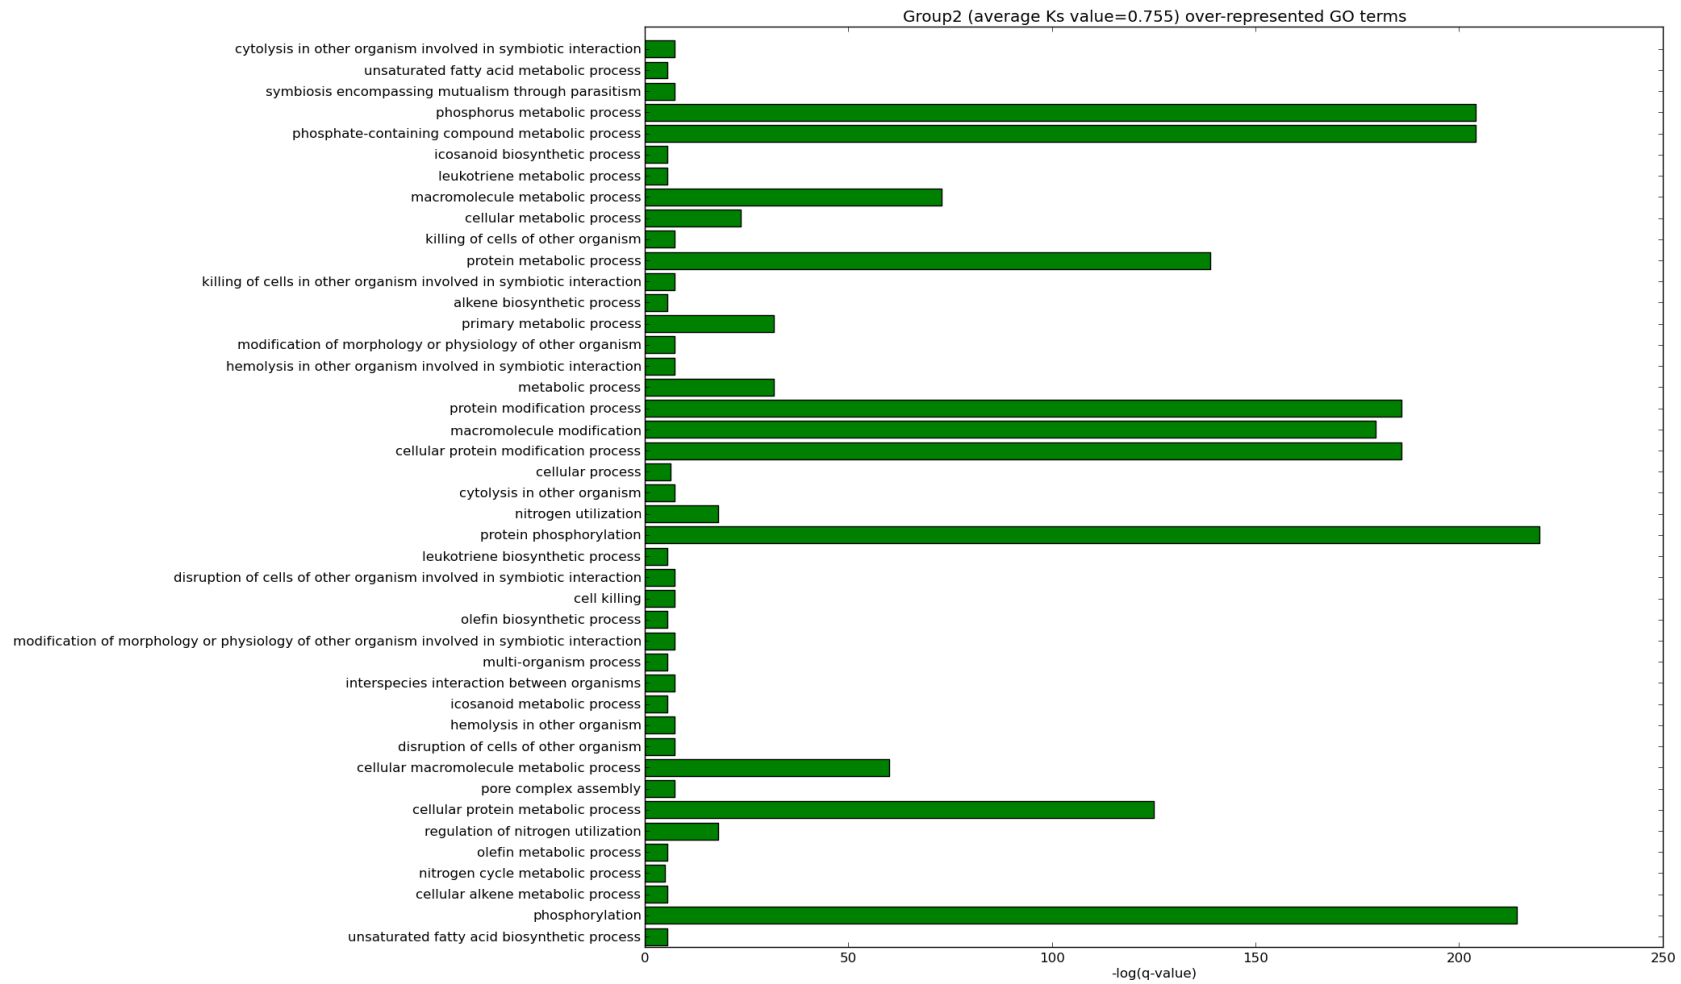



C.

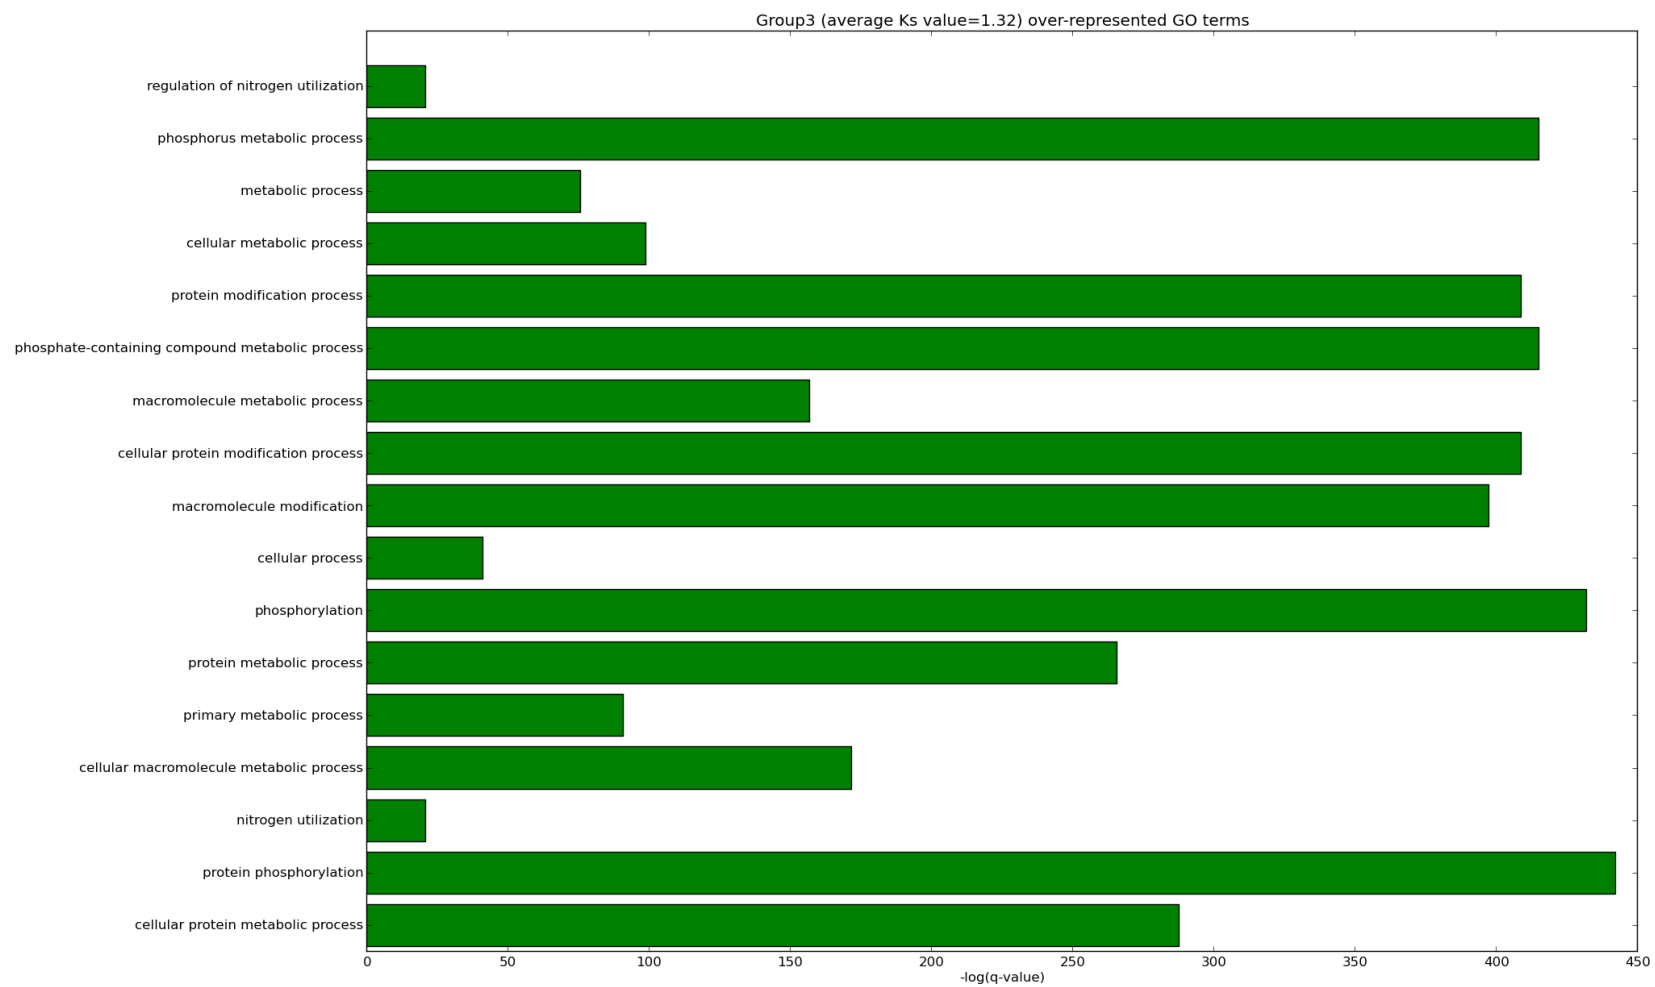

**D.**

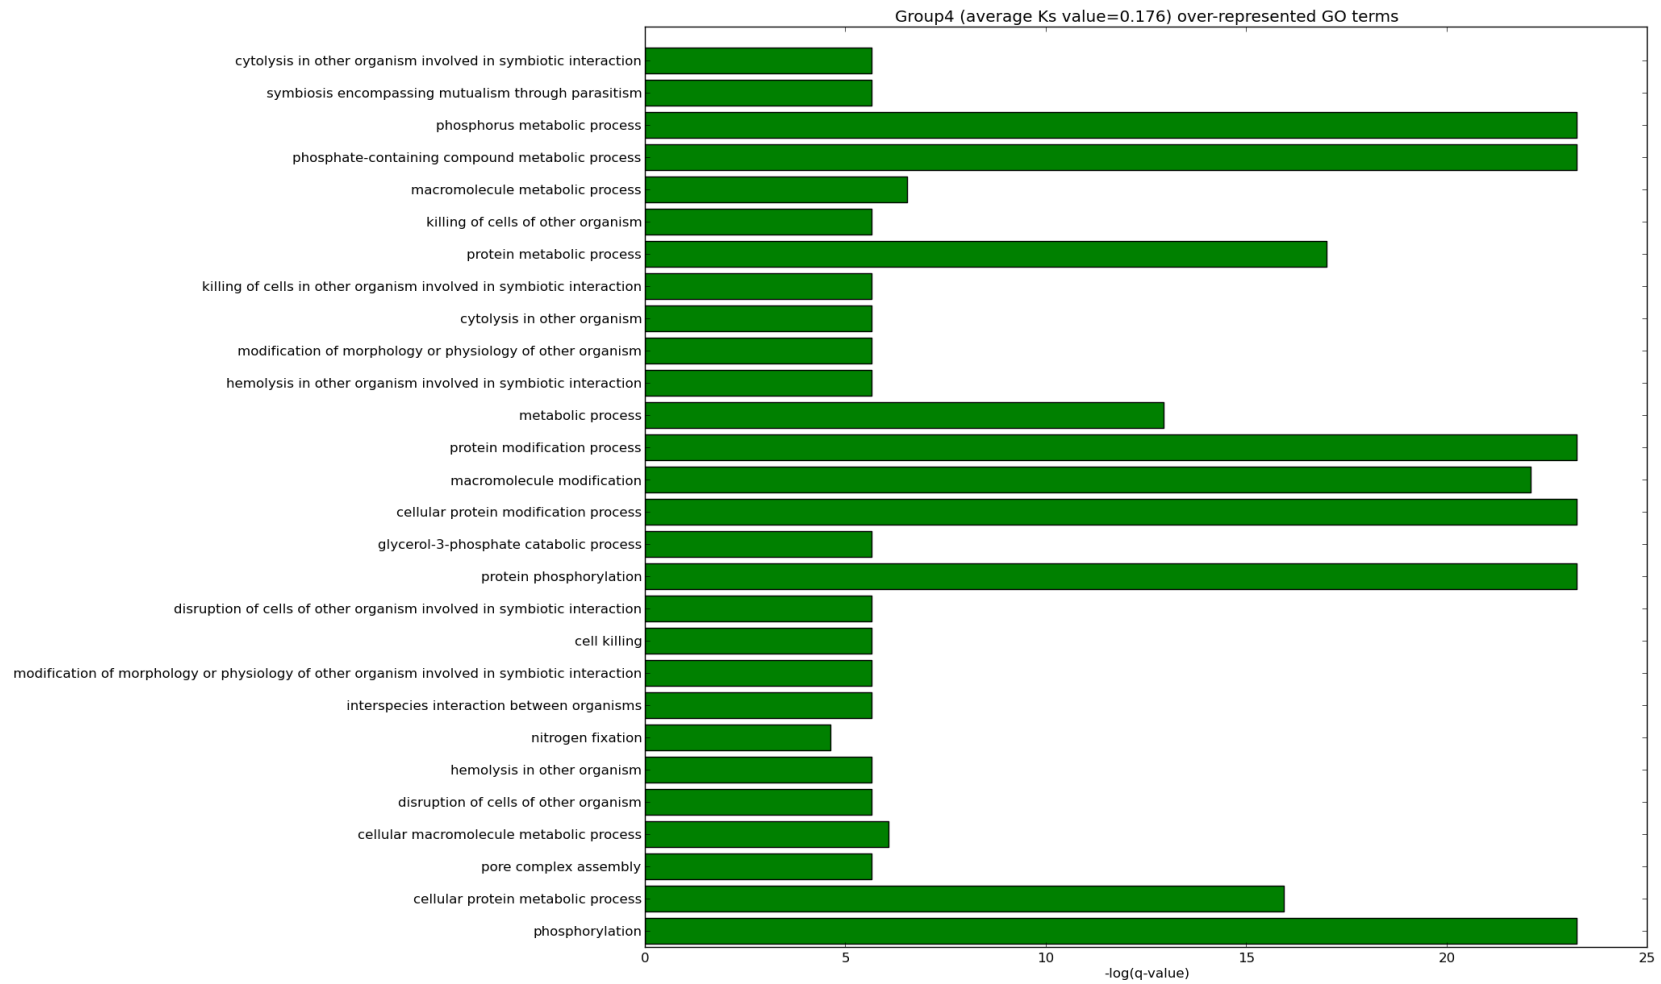

E.

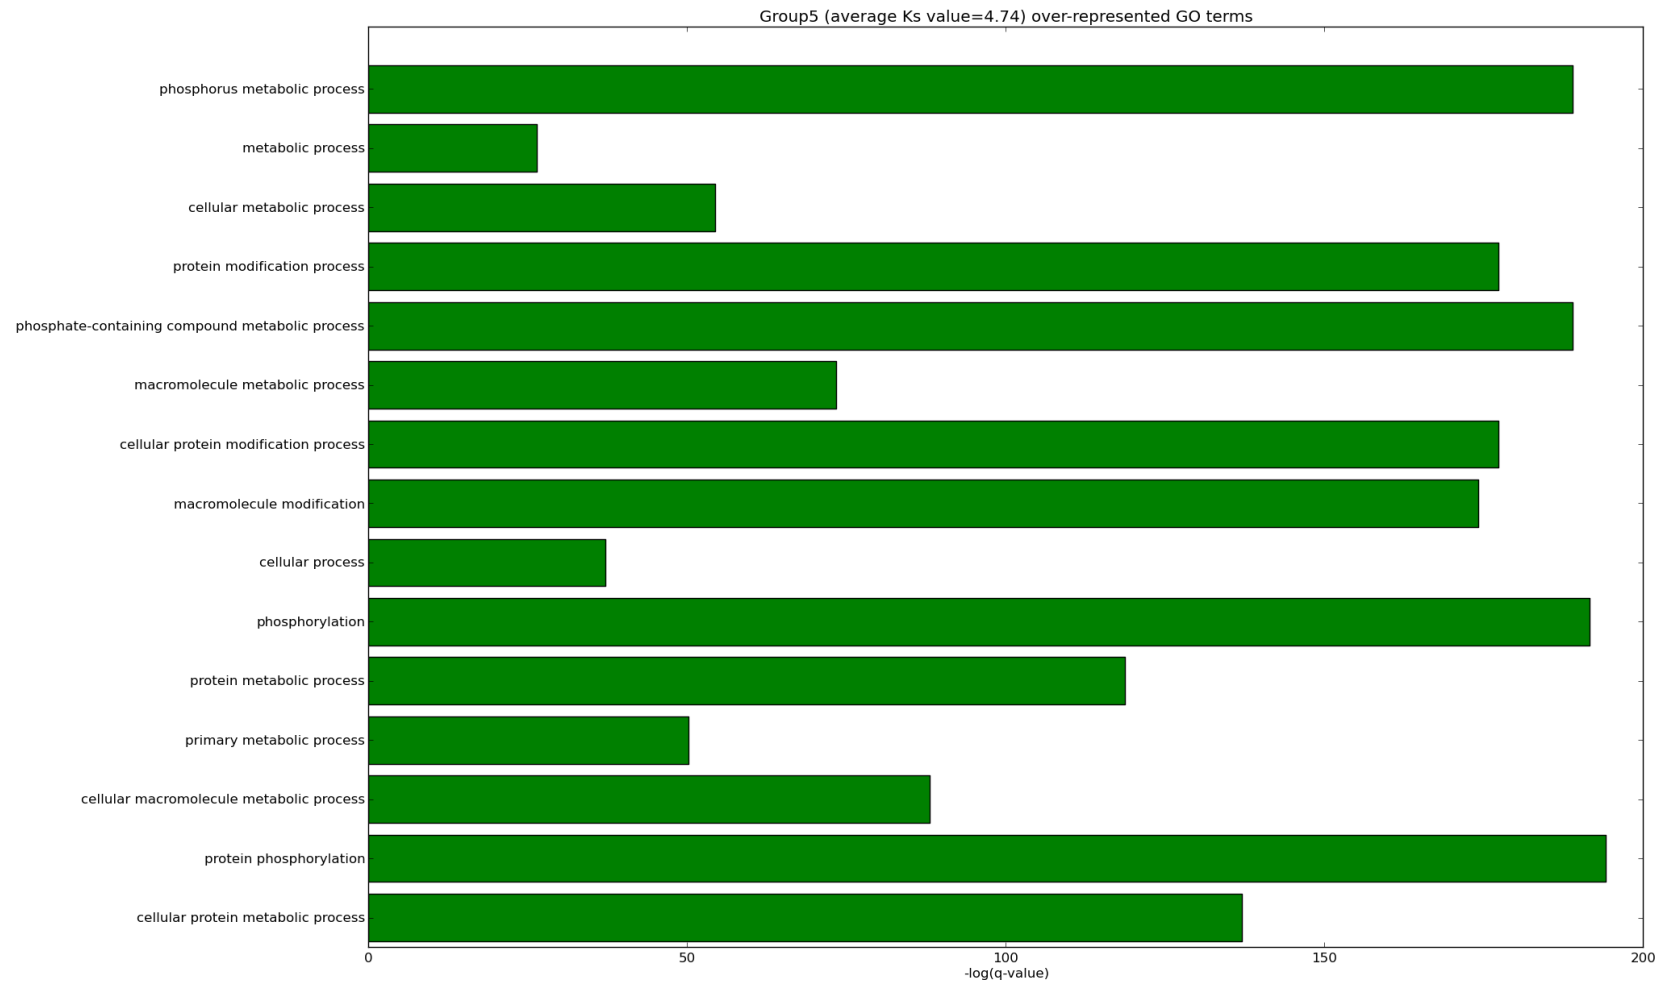

**F.**

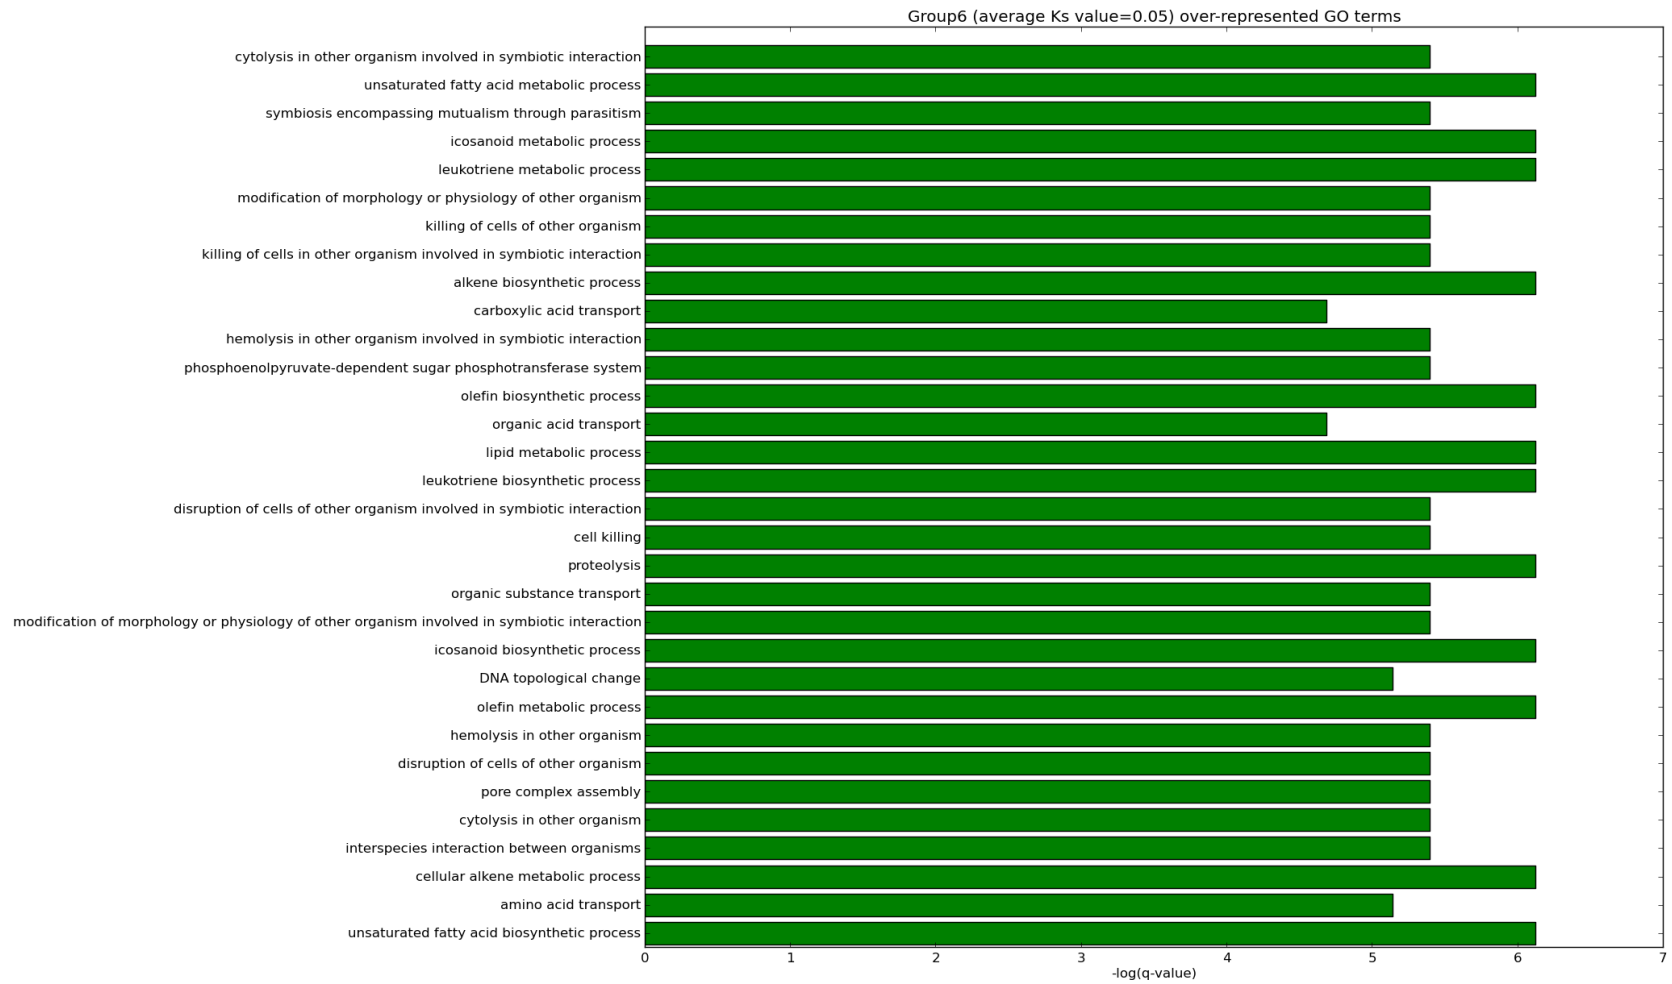

G.

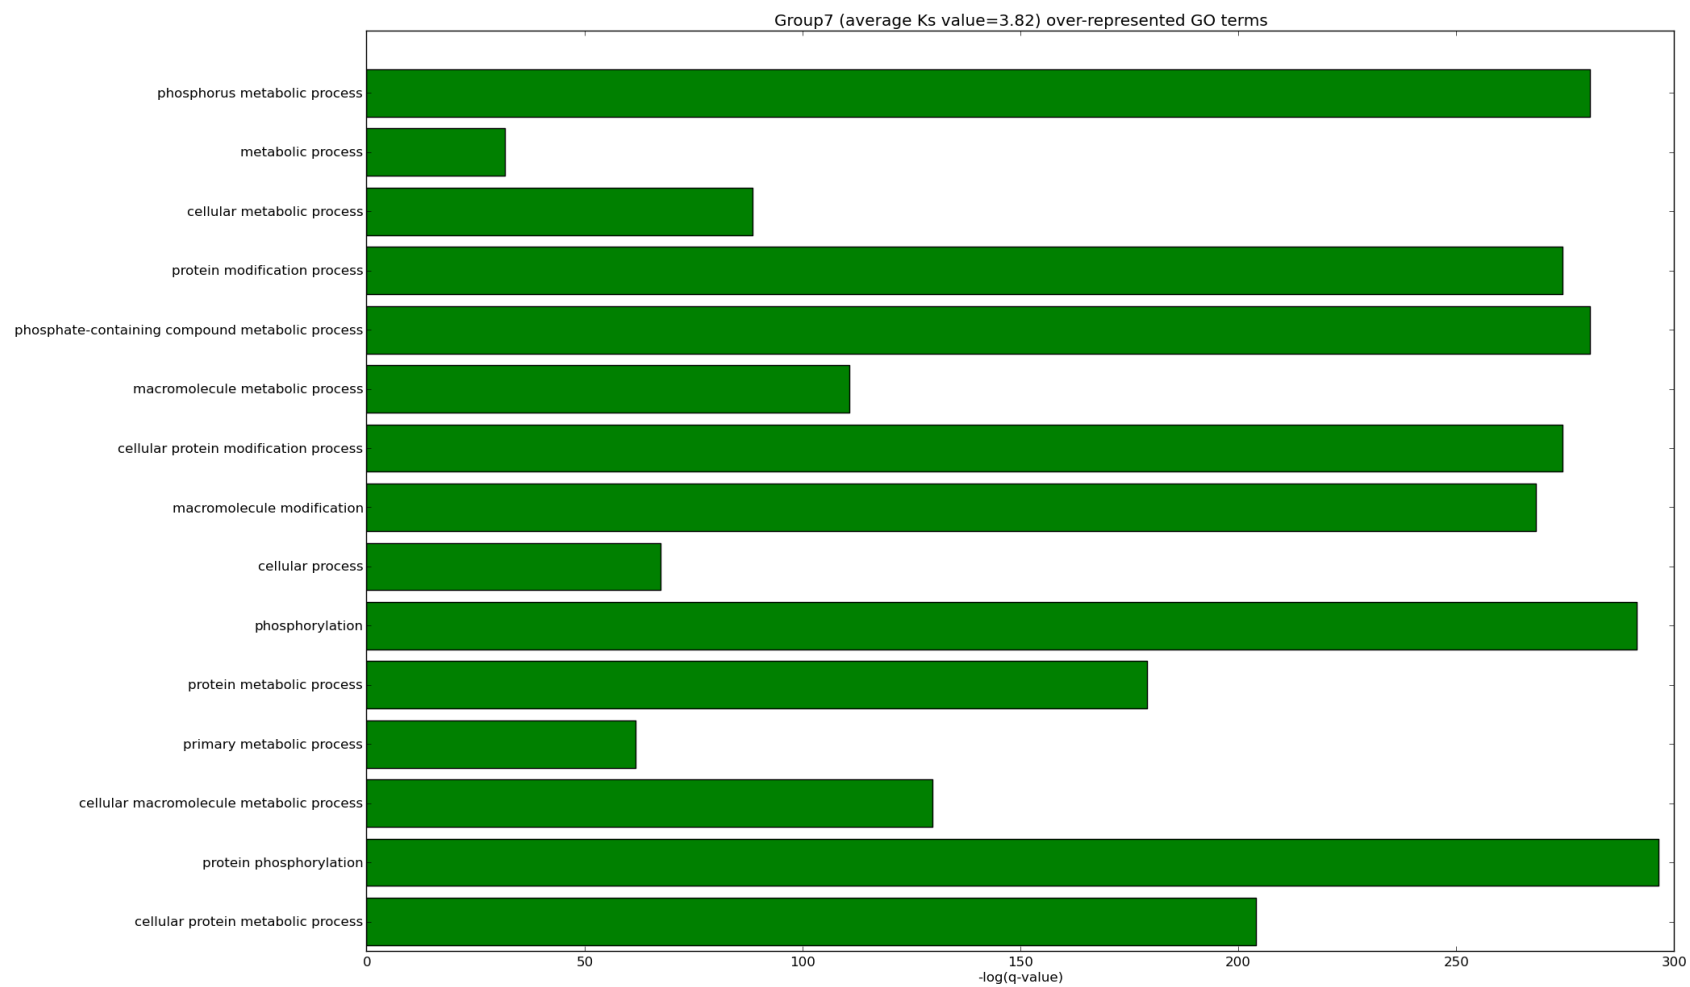

# H.

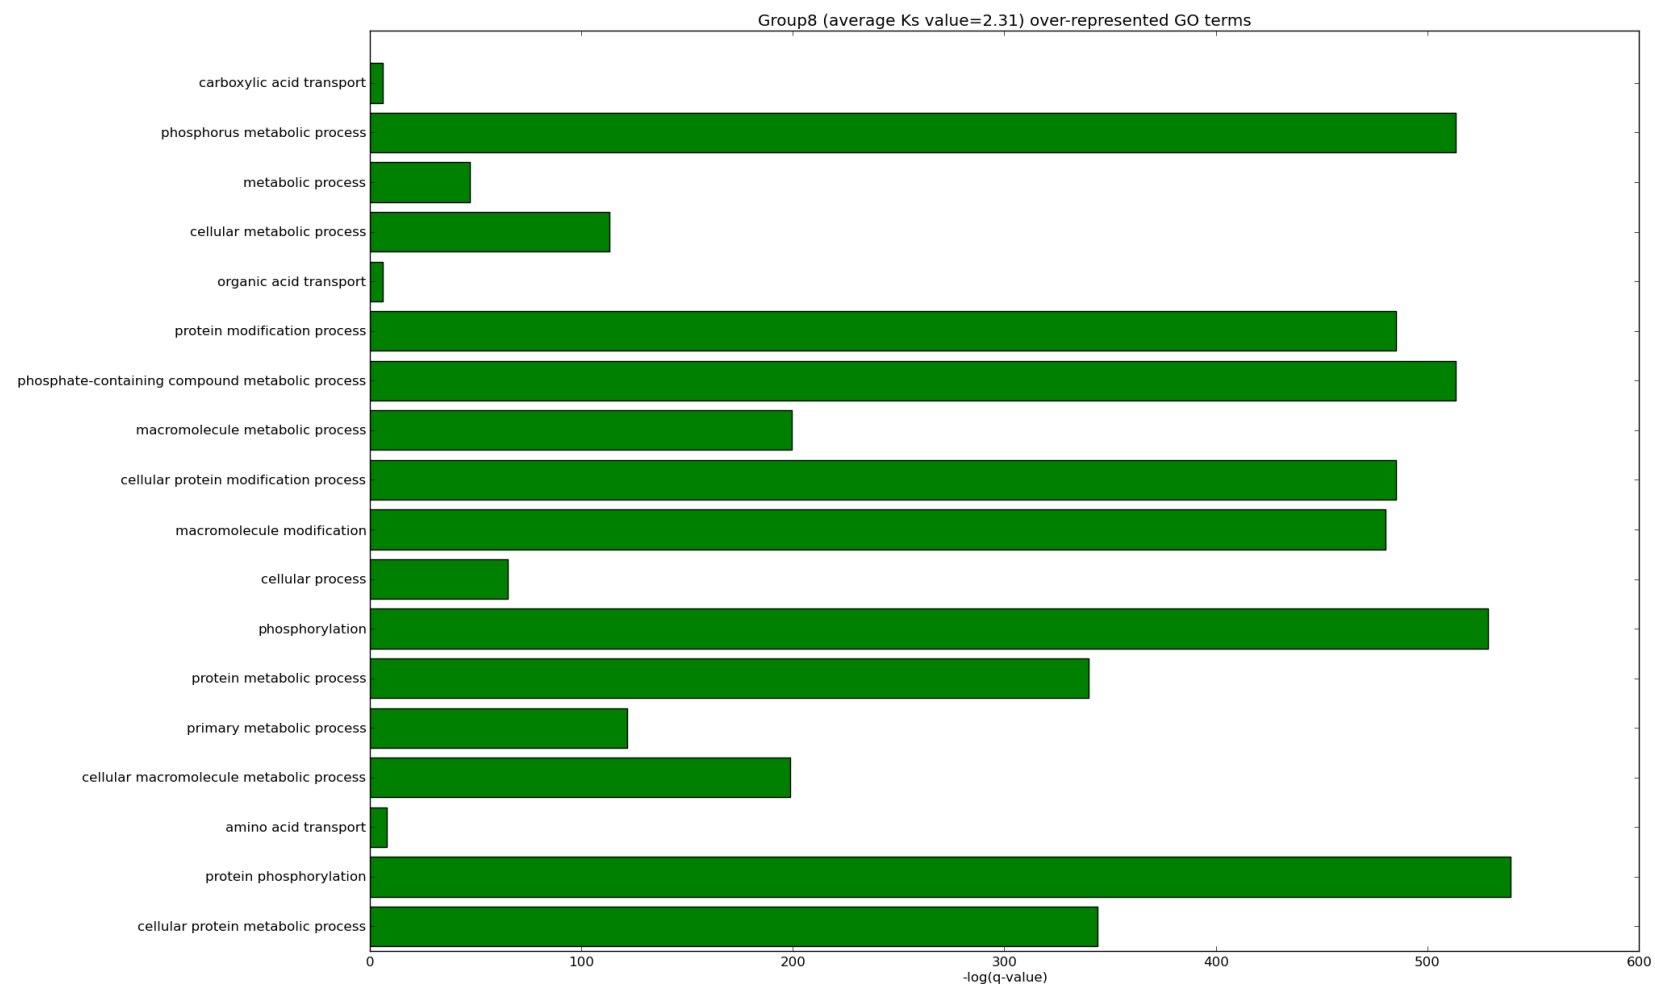

**Figure S10.** Features of the *R. irregularis* protein-coding genes compared to other representative fungi. Intervals between quartile 1 and quartile 3 are represented by grey bars. Median and number of introns by gene are indicated in red for *Rhizophagus irregularis*. The intergenic region length is likely underestimated as the assembly is highly fragmented.

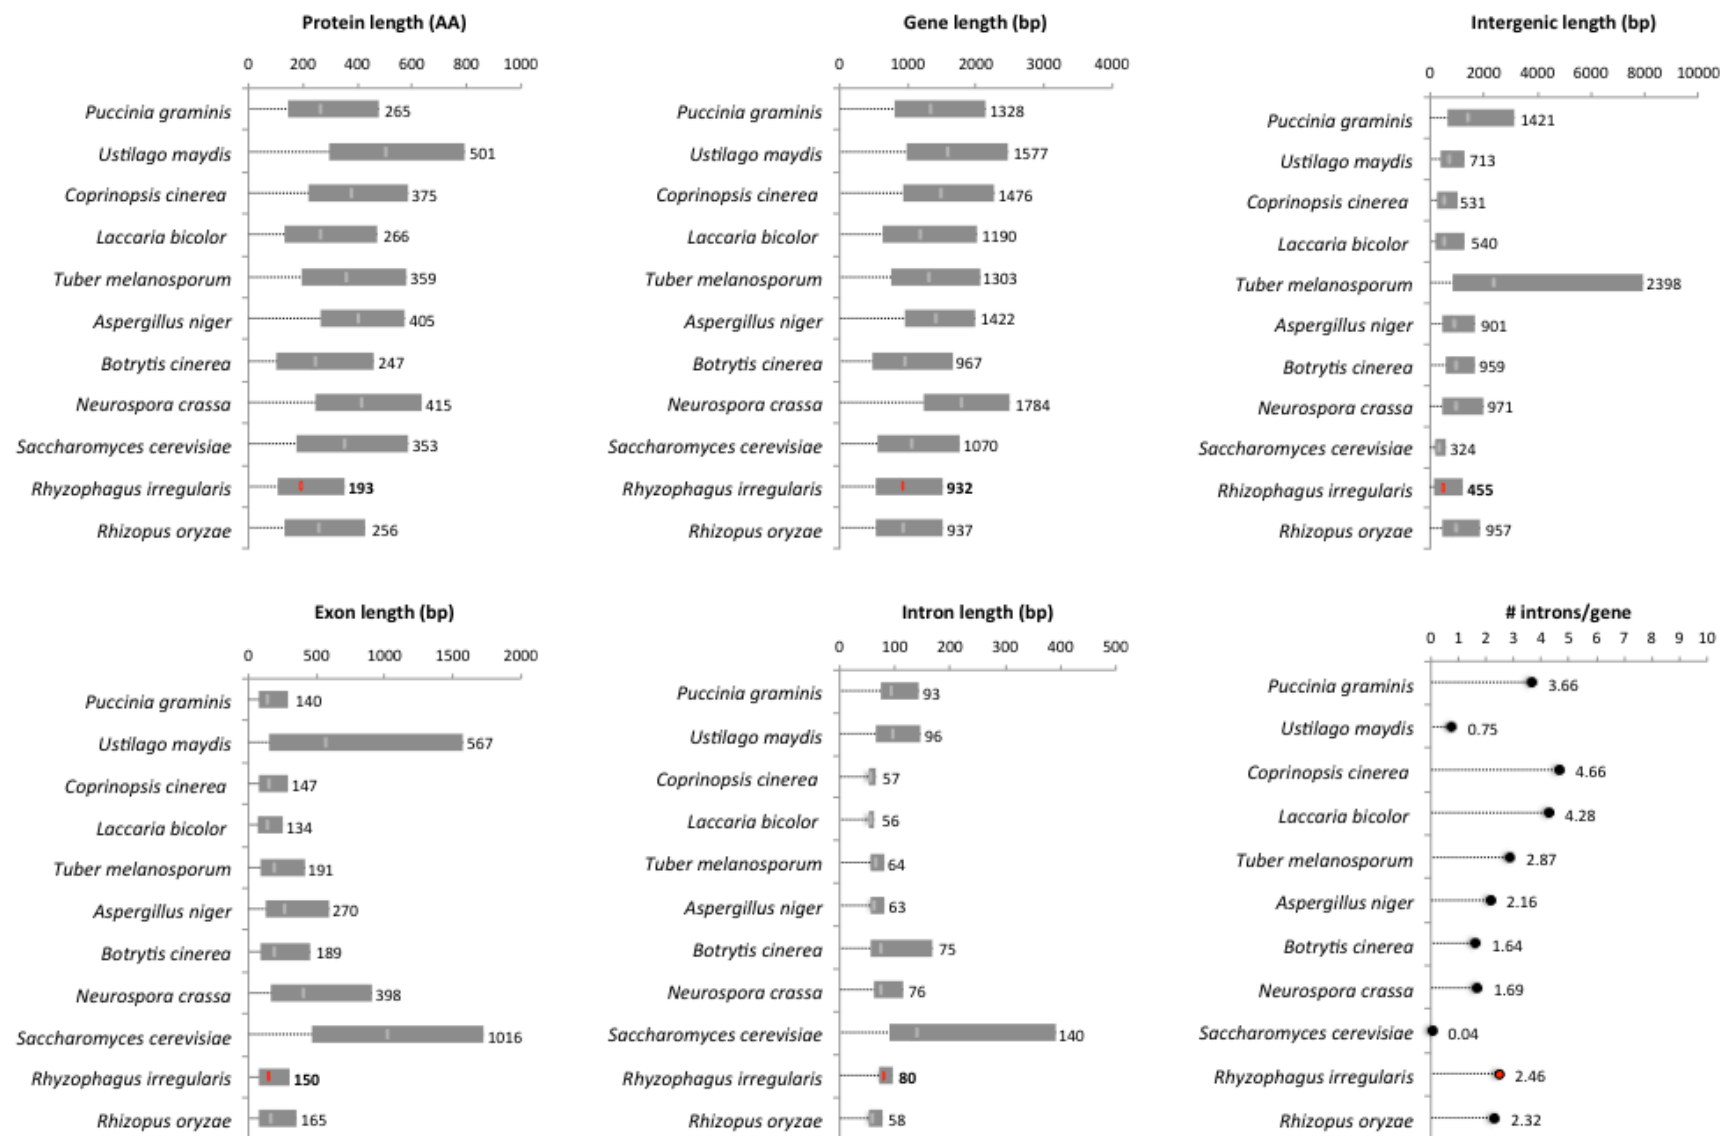

**Figure S11.** Analysis of molecular divergence between the *R. irregularis* proteome and selected organisms. The *Rhizophagus irregularis*–Mortierellomycotina pair displays the highest amino acid identity, in agreement with their phylogeny. In the figure, we represent the cumulative frequencies of amino acid identity across each set of potential orthologous pairs shown. (Basidiomycota: *Puccinia graminis*, *Ustilago maydis*, *Coprinopsis cinerea*, *Laccaria bicolor*; Ascomycota: *Tuber melanosporum*, *Aspergillus niger*, *Botrytis cinerea*, *Neurospora crassa*, *Saccharomyces cerevisiae*; Mucoromycotina: *Rhizopus oryzae*; Mortierellomycotina: *Mortierella elongata*; Amoebozoa/Choanoflagellida: *Dictyostelium discoideum*, *Monosiga brevicollis*).

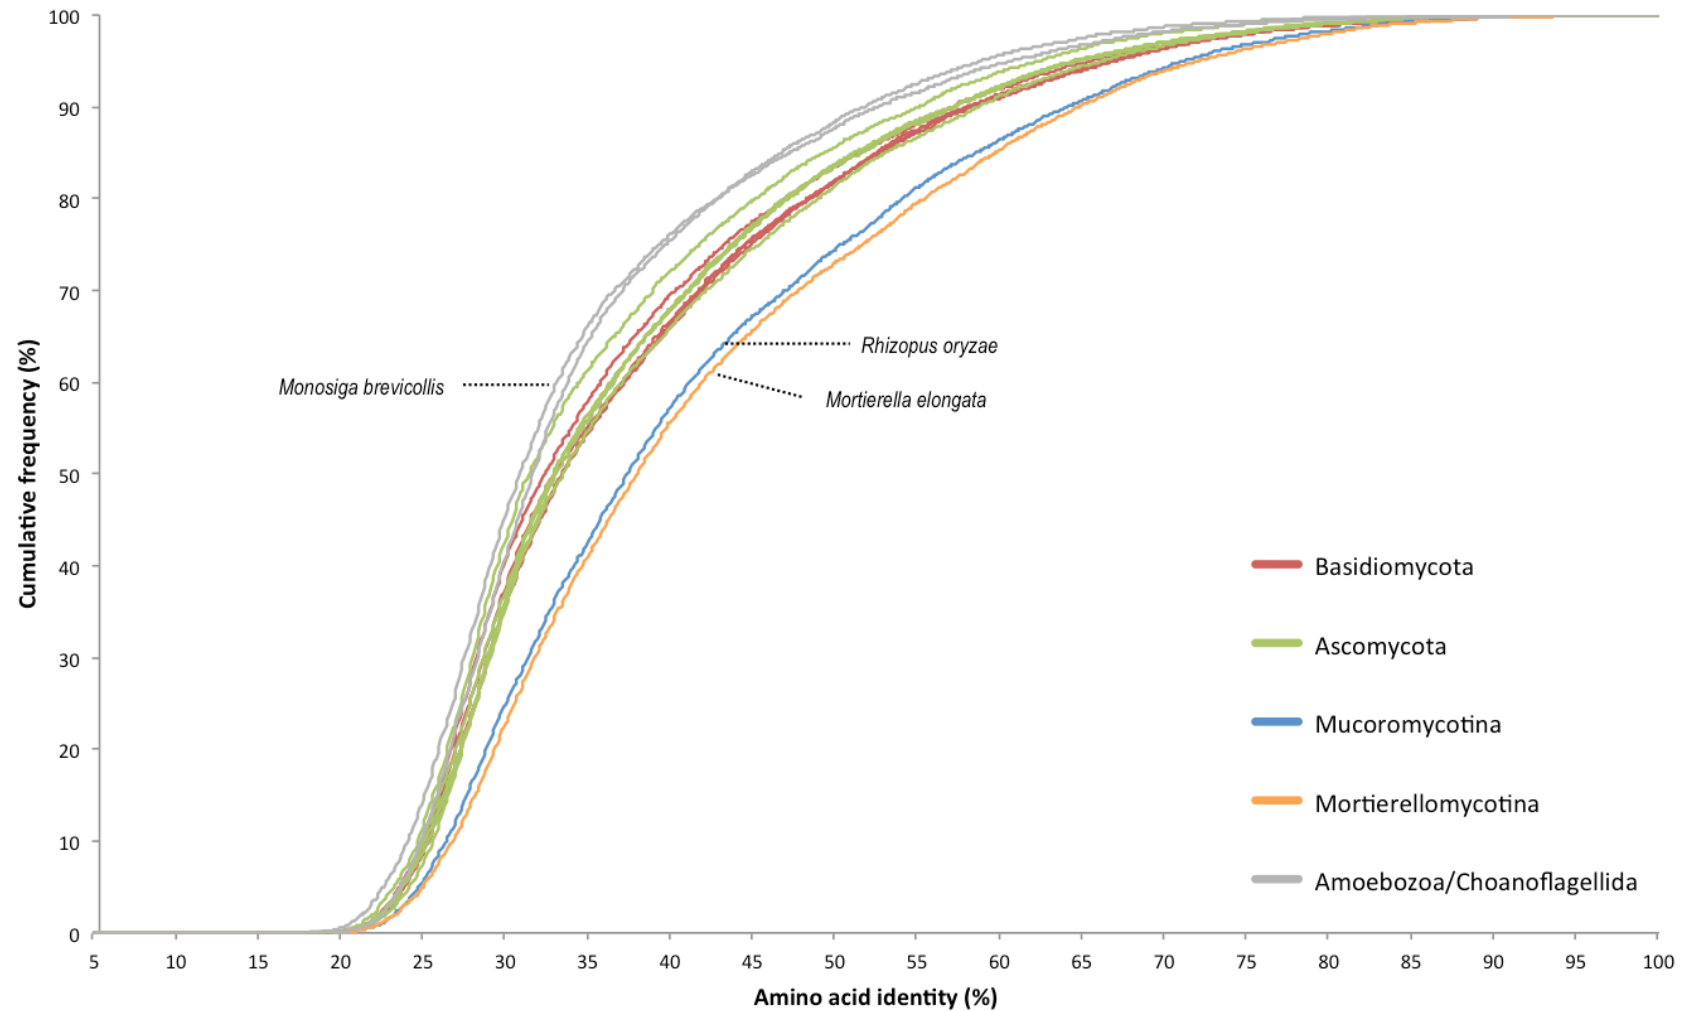



**Figure S12.** Gene orthology and evolution. Orthology assignment of 12 fungal genomes. Bars are subdivided to represent different types of orthology relationships. “Core genes” indicates universal core genes but absence in two genomes is tolerated. “Basidio” indicates Basidiomycota-specific genes with presence in at least two genomes. “Asco” indicates Ascomycota-specific genes with presence in at least two genomes; “Basal” indicates basal species-specific genes with presence in at least two genomes; “Patchy” indicates genes that are present in at least two genomes within different groups. “Species specific” indicates genes with no (detectable) homologs in other species, i.e. orphan genes. The phylogeny on the left was calculated using maximum likelihood analyses of a concatenated alignment of 85 single-copy proteins. The tree was rooted using *Dictyostelium discoideum* as outgroup.

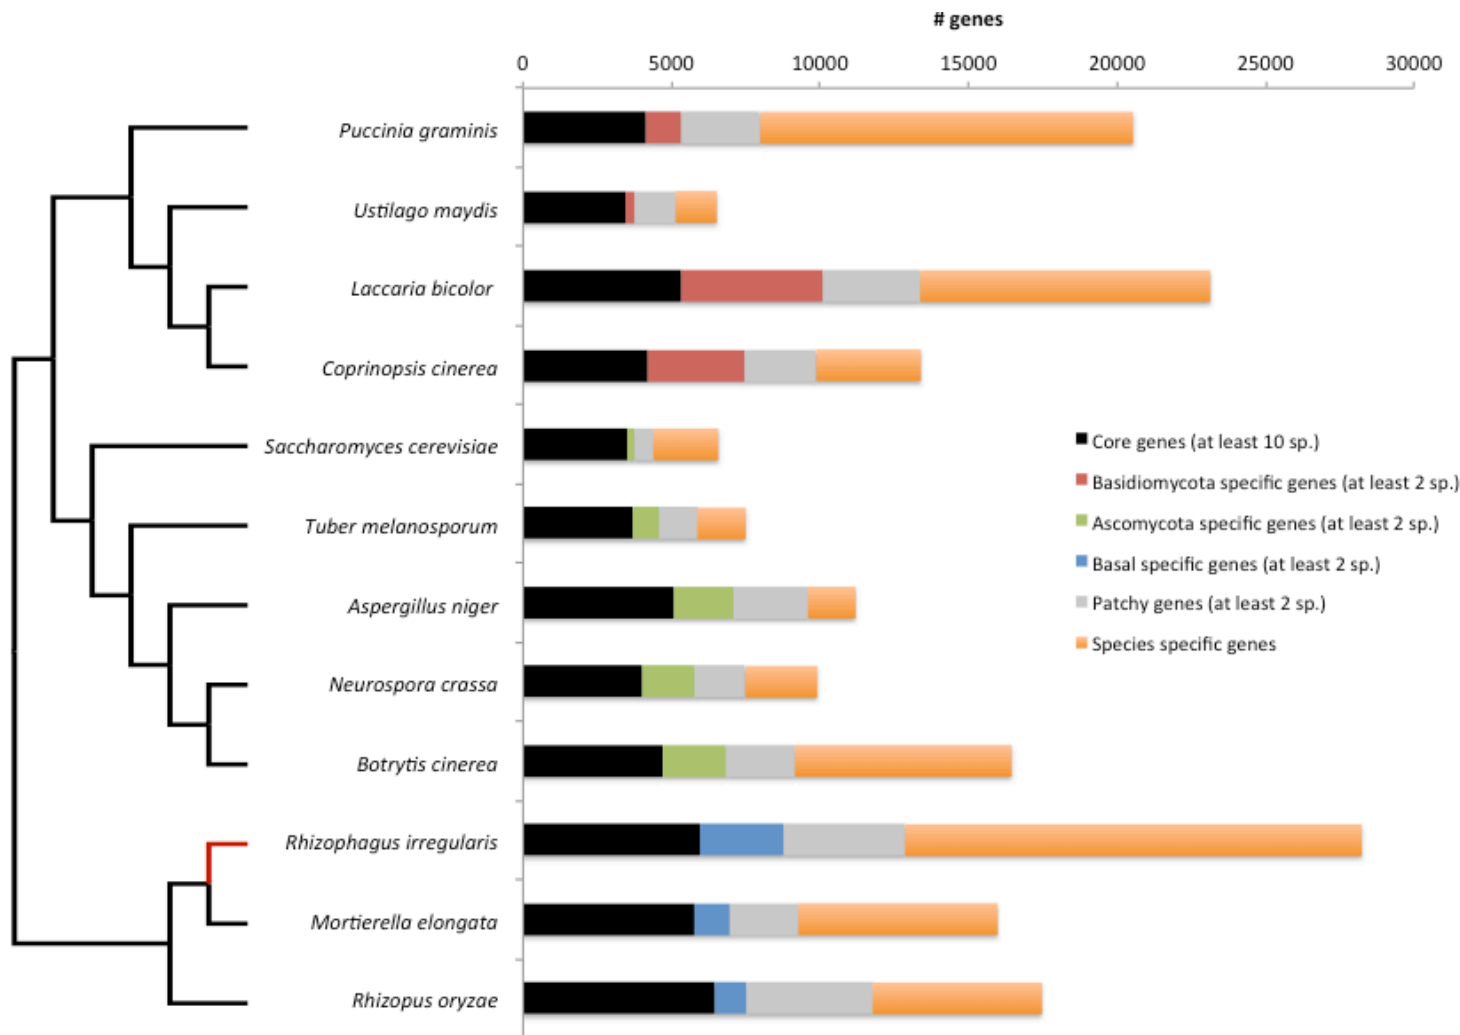

**Figure S13.** Genome redundancy in the *R. irregularis* genome. The figure represents the total number of gene families in each species or node. The numerals on branches and pie charts at each branch terminus show the proportion of expanded (red), unchanged (black/grey) or contracted (blue) gene families along lineages by comparison to the putative pan-genome. CAFE analysis,  $p$ -value <0.001. MRCA, most recent common ancestor.

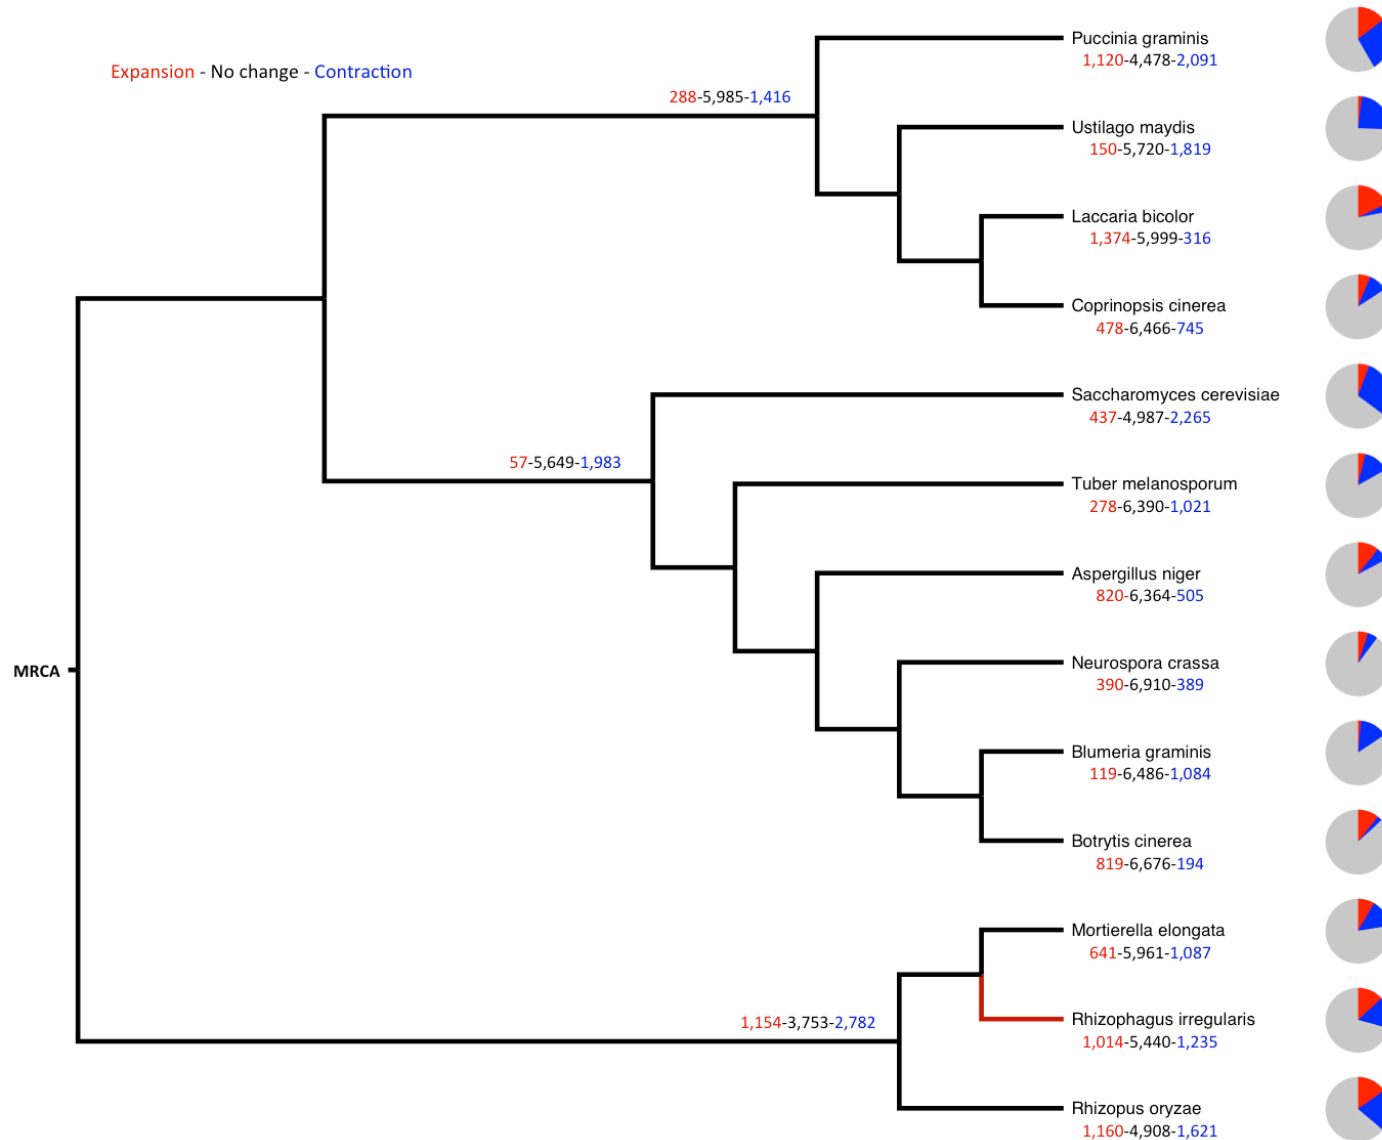

**Figure S14.** Phylogenetic reconstruction, expression profiling and protein domains in full-length *Rhizoglyphus*-specific tyrosine kinase-like proteins. **A**, Phylogenetic tree of 88 DAOM-197198-specific whole catalytic domain tyrosine kinase-like proteins obtained via neighbor-joining phylogenetic analysis. **B**, Expression levels measured by mapping RNA-Seq reads from DAOM-197198 germinated spores (DAOM), C2 germinated spores (C2), *R. diaphanum* germinated spores (*G. diaph.*), DAOM-197198 spores germinated for 2 days (Spores 2d), DAOM-197198 spores germinated for 9 days (Spores 9d) and in *Rhizoglyphus-Medicago* symbiotic roots (*in Planta*). Expression levels is represented by a colour scale from 0 (white) to 100 (red). **C**, Location of tyrosine kinase-like and other PFAM domains (LRR\_1: Leucine-rich repeat; Sell1: Sell1 repeat; TMH: transmembrane helices; TKL: tyrosine kinase-like; HMG\_box: high mobility group).

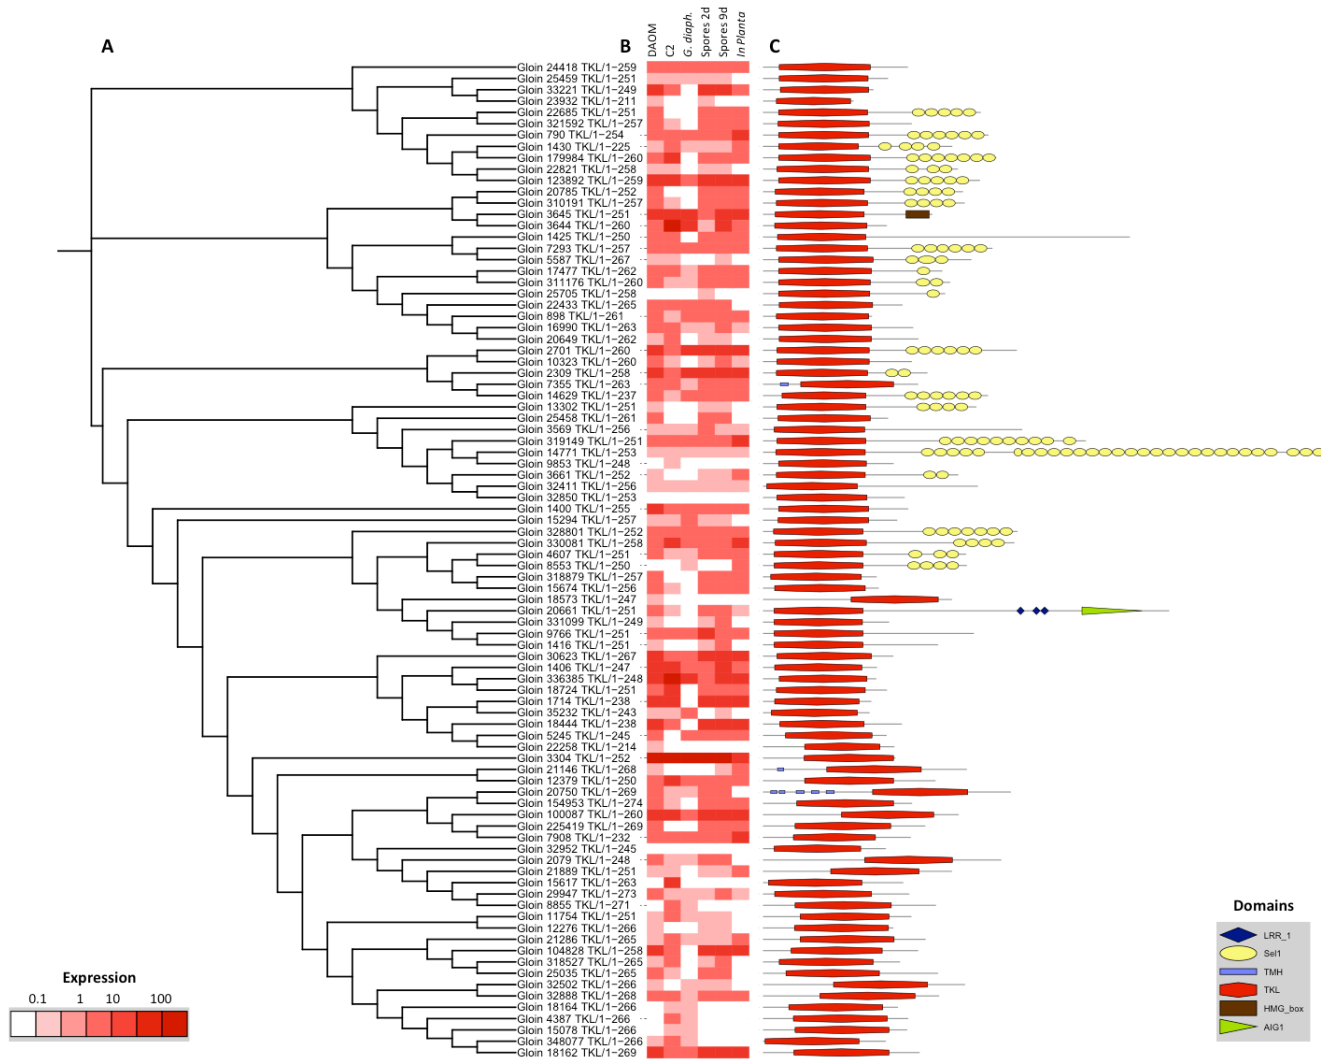

**Figure S15.** Double clustering of the CAZyme families acting on plant cell wall polysaccharides and lignin-related oxidoreductases from *Rhizophagus irregularis* (red arrow and line) and representative fungal genomes. Top tree: fungal species. Left tree: the enzyme families are represented by their class (GH, glycoside hydrolase; PL, polysaccharide lyase; AA1: laccase; AA2: C2 peroxidase) and family number according to the Carbohydrate-Active enZymes Database database (<http://www.cazy.org/>). Abundance of the different enzymes within a family is represented by a color scale from 0 (blue) to 44 occurrences (red) per species.

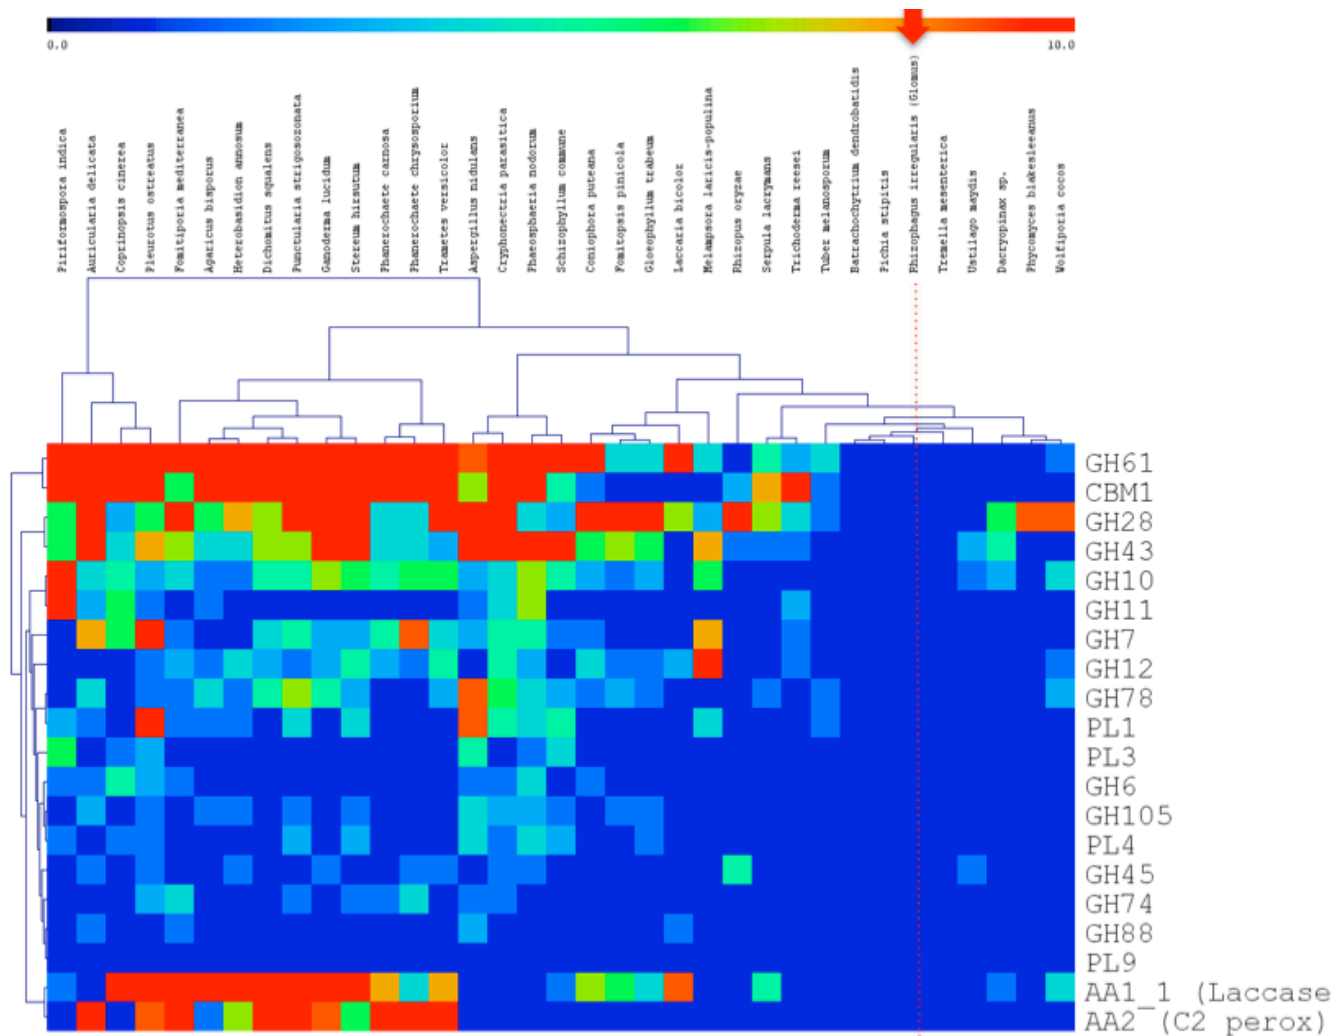

**Figure S16.** Correlation of KEGG pathway profiles between 12 fungal species from the early diverging Fungi (including *R. irregularis*, black arrow) and Dikarya. Pearson correlation distance matrix was calculated based on presence/absence profile of protein-coding genes assign to each KEGG orthology for each species. Colors are coded from dark red representing high correlation to light red representing low correlation. **A**, All KEGG categories; **B**, Metabolism; **C**, Genetic Information Processing; **D**, Environmental Information Processing and **E**, Cellular Processes. (Pucgr: *Puccinia graminis*; Ustma: *Ustilago maydis*; Copci: *Coprinopsis cinerea*; Lacbi: *Laccaria bicolor*; Tubme: *Tuber melanosporum*; Aspni: *Aspergillus niger*; Botci: *Botrytis cinerea*; Neucr: *Neurospora crassa*; Rhiir: *Rhizophagus irregularis*; Morel: *Mortierella elongata*; Rhior: *Rhizopus oryzae*).

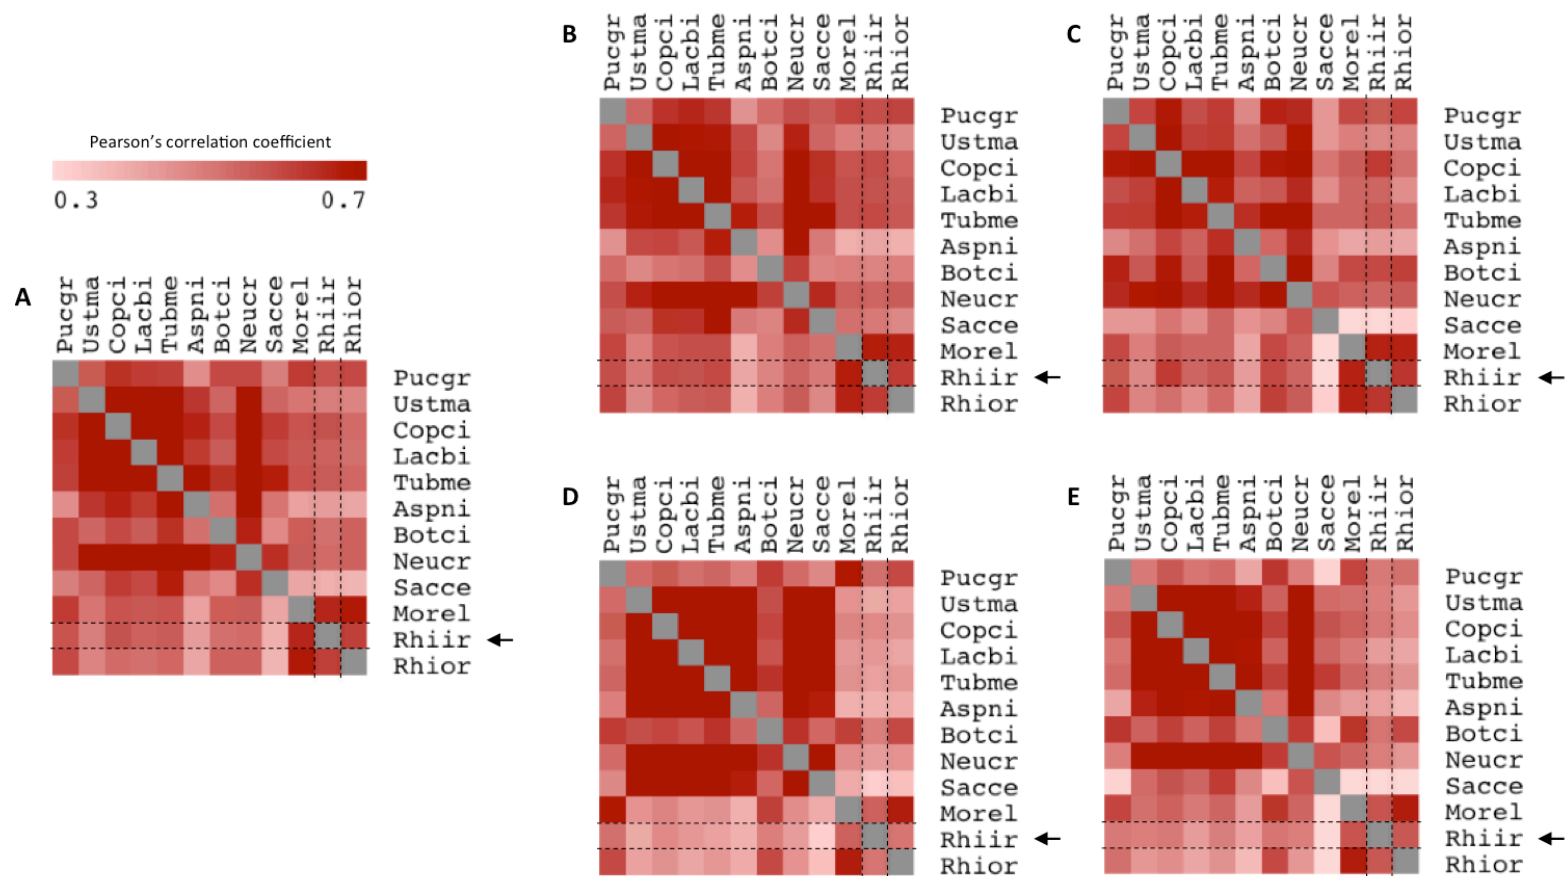

**Figure S17.** A hierarchical cluster tree showing the relationships between the Glomeromycota *R. irregularis*, and representative Mucoromycotina, Ascomycota and Basidiomycota based on the *Saccharomyces cerevisiae* core genes missing from their genomes (based on presence/absence profile of protein-coding genes assign to *Saccharomyces cerevisiae* core genes for each species) (see Table at <http://mycor.nancy.inra.fr/IMG/GlomerusGenome/download3.php?select=anno> ). Tree was generated using hierarchical clustering (average linkage clustering) method with MeV software (<http://www.tm4.org/mev.html>). BLASTP e-value, 1<sup>e</sup>-5. Blugr, *Blumeria graminis*; Pucgr, *Puccinia graminis*; Ustma, *Ustilago maydis*; Copci, *Coprinopsis cinerea*; Lacbi, *Laccaria bicolor*; Mella, *Melampsora larici-populina*; Tubme, *Tuber melanosporum*; Aspni, *Aspergillus niger*; Botci, *Botrytis cinerea*; Neucr, *Neurospora crassa*; Mucci, *Mucor circinelloides*; Phybl, *Phycomyces blakesleeanus*; Rhior: *Rhizopus oryzae*; Batde, *Batrachochytrium dendrobatidis*; Rhiir, *Rhizophagus irregularis*.

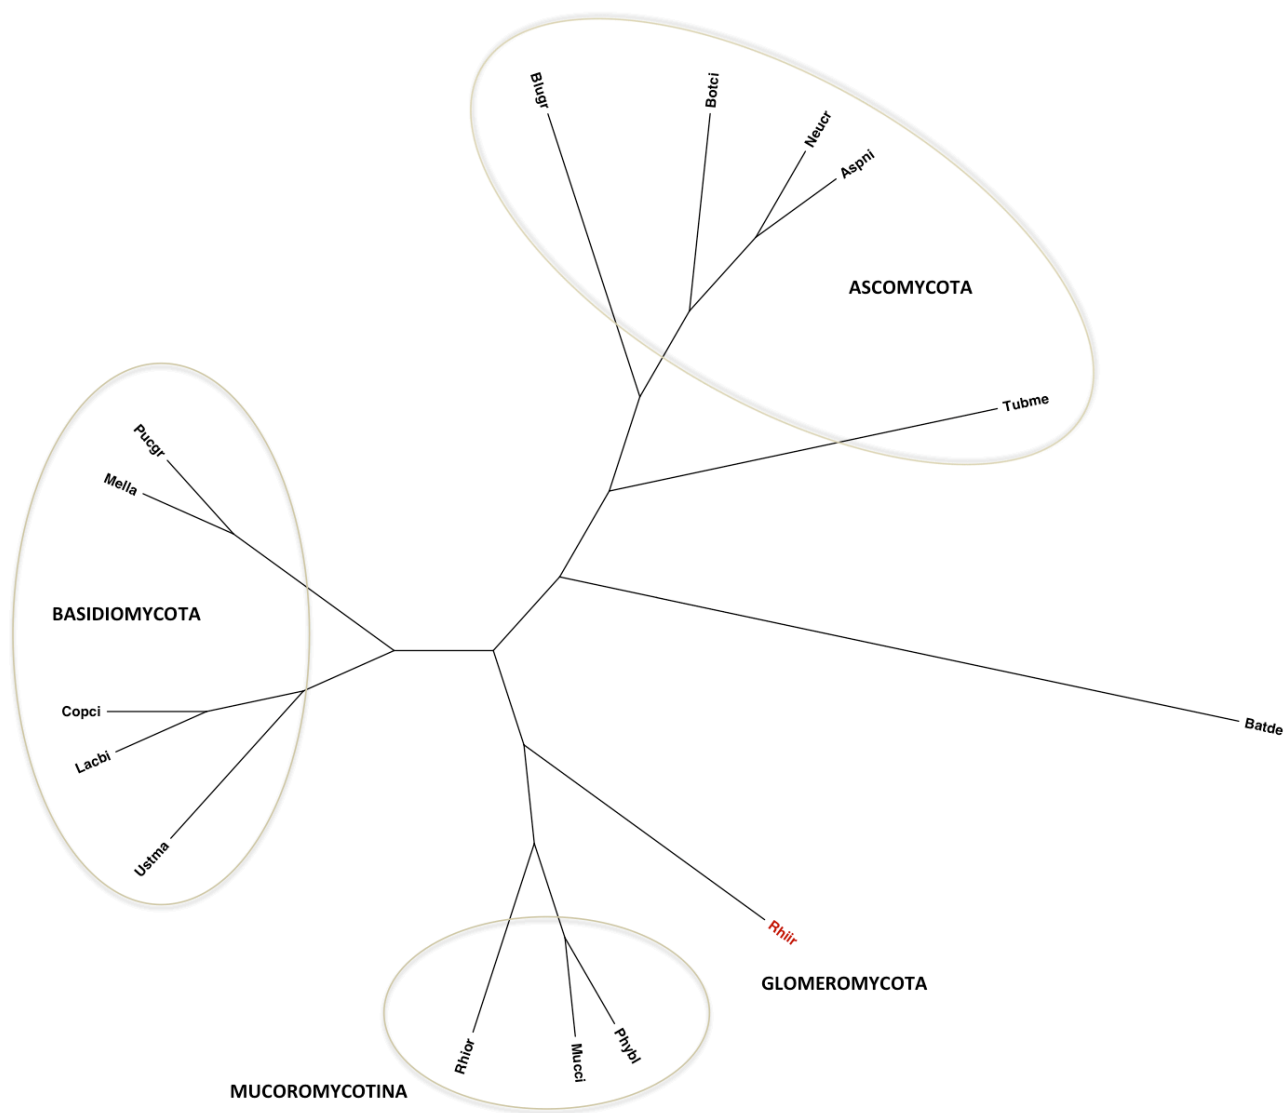

**Figure S18.** Symbiosis-upregulated genes in *Rhizophagus-Medicago* symbiotic roots. Distribution of genes (%) into functional categories according to the KOG classification. Red bars indicate the distribution of genes induced *in planta* (fold change > 2; FDR < 0.05), whereas grey bars indicate to total gene distribution per KOG category. Asterisks indicate overrepresented KOG categories in induced gene distribution relative to global gene distribution (Fischer's exact test, P < 0.05).

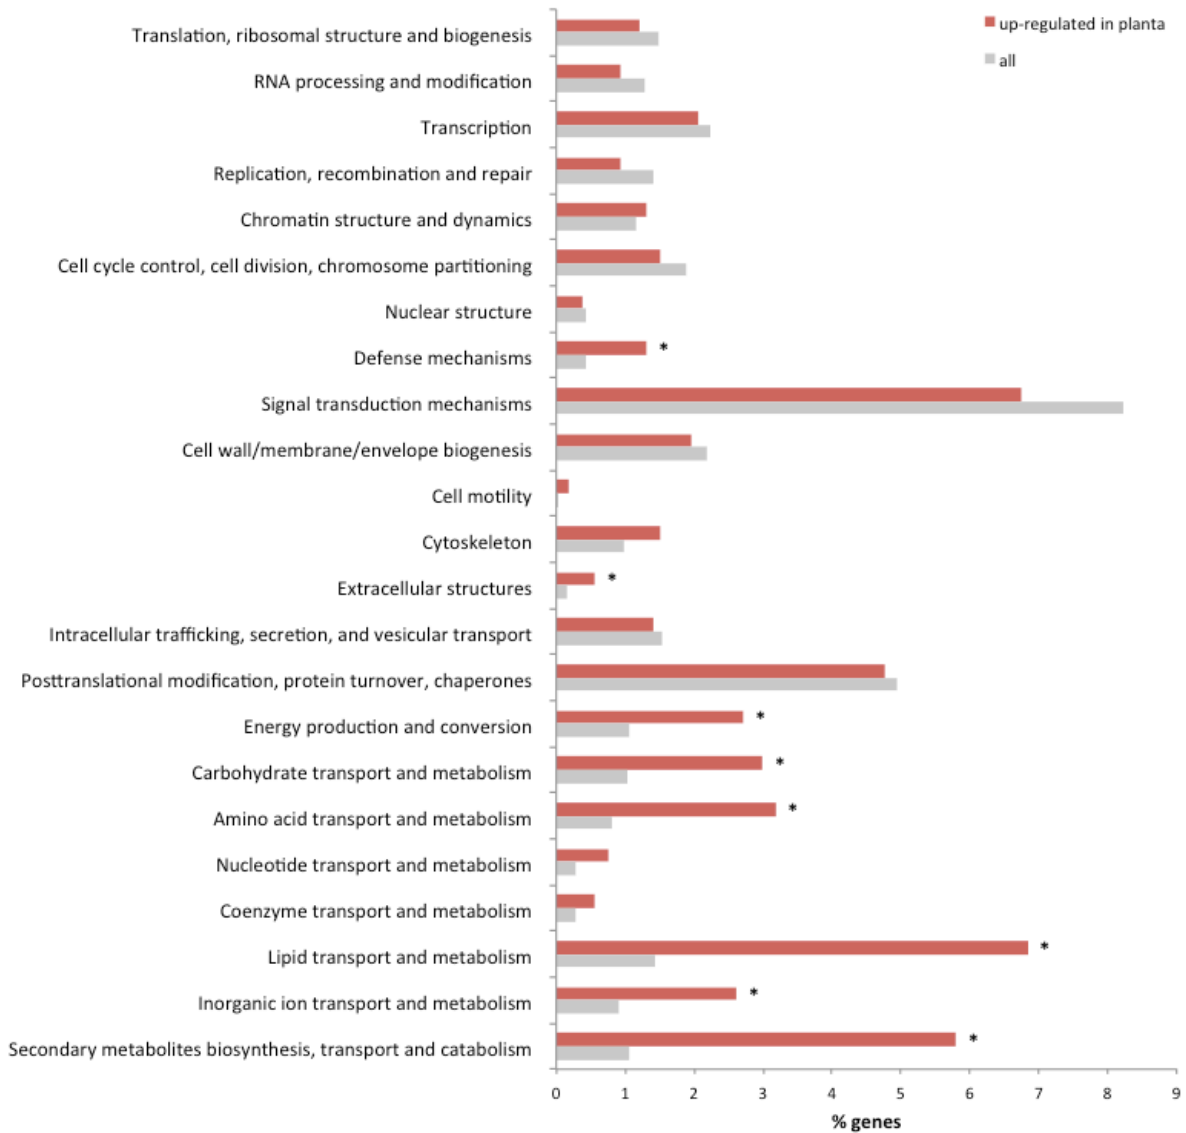

**Figure S19.** Distribution of genes with MATA-related HMG domains in *R. irregularis* DAOM-197198 and representative species of Ascomycota, Basidiomycota, Zygomycota and Chytridiomycota. Left tree: phylogenetic tree based on ribosomal RNA genes. The location of the MATA-related HMG in the *R. irregularis* assembly and their best reciprocal hit against the GenBank nr database are shown in Table S17.

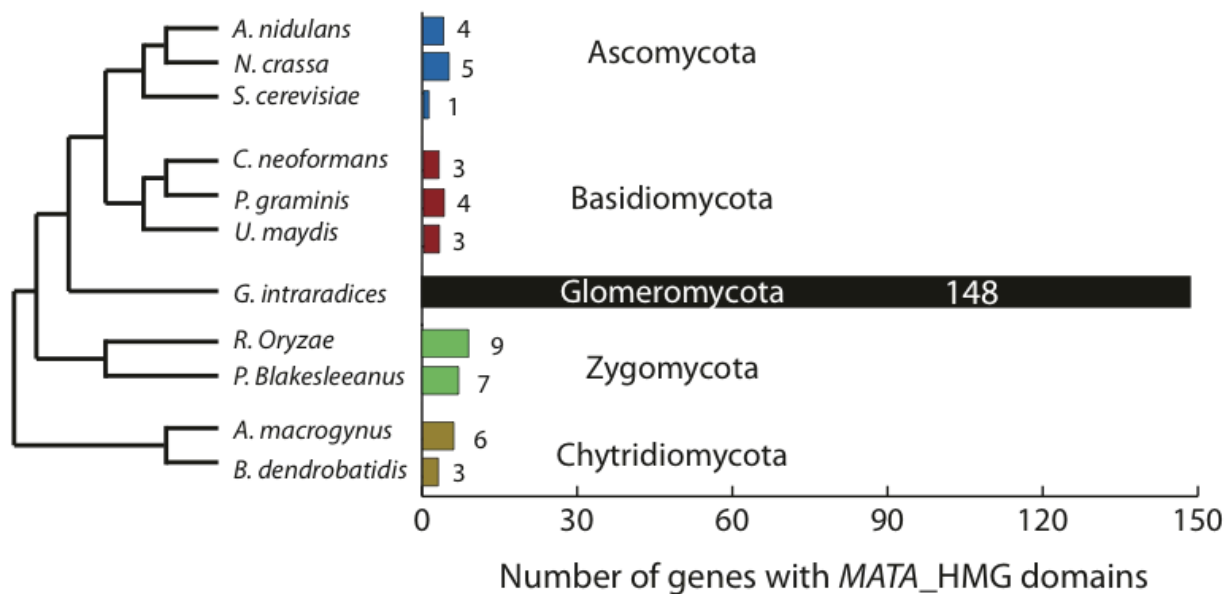



**Figure S20.** Features of *R. irregularis* genome scaffolds. Top left panel, % identity to fungal and bacterial sequences; top right panel, % identity with bacterial genes vs. GC content of genes; bottom left panel, genes expression in germinated spores vs. % identity with bacterial genes; bottom right, scaffold GC content vs. scaffold sequence coverage. Bacterial contaminant (red), Illumina Phix sequence contaminant (black), mitochondrial (green) and Sel1-like (blue) sequences are indicated. All others sequences are represented by grey color.

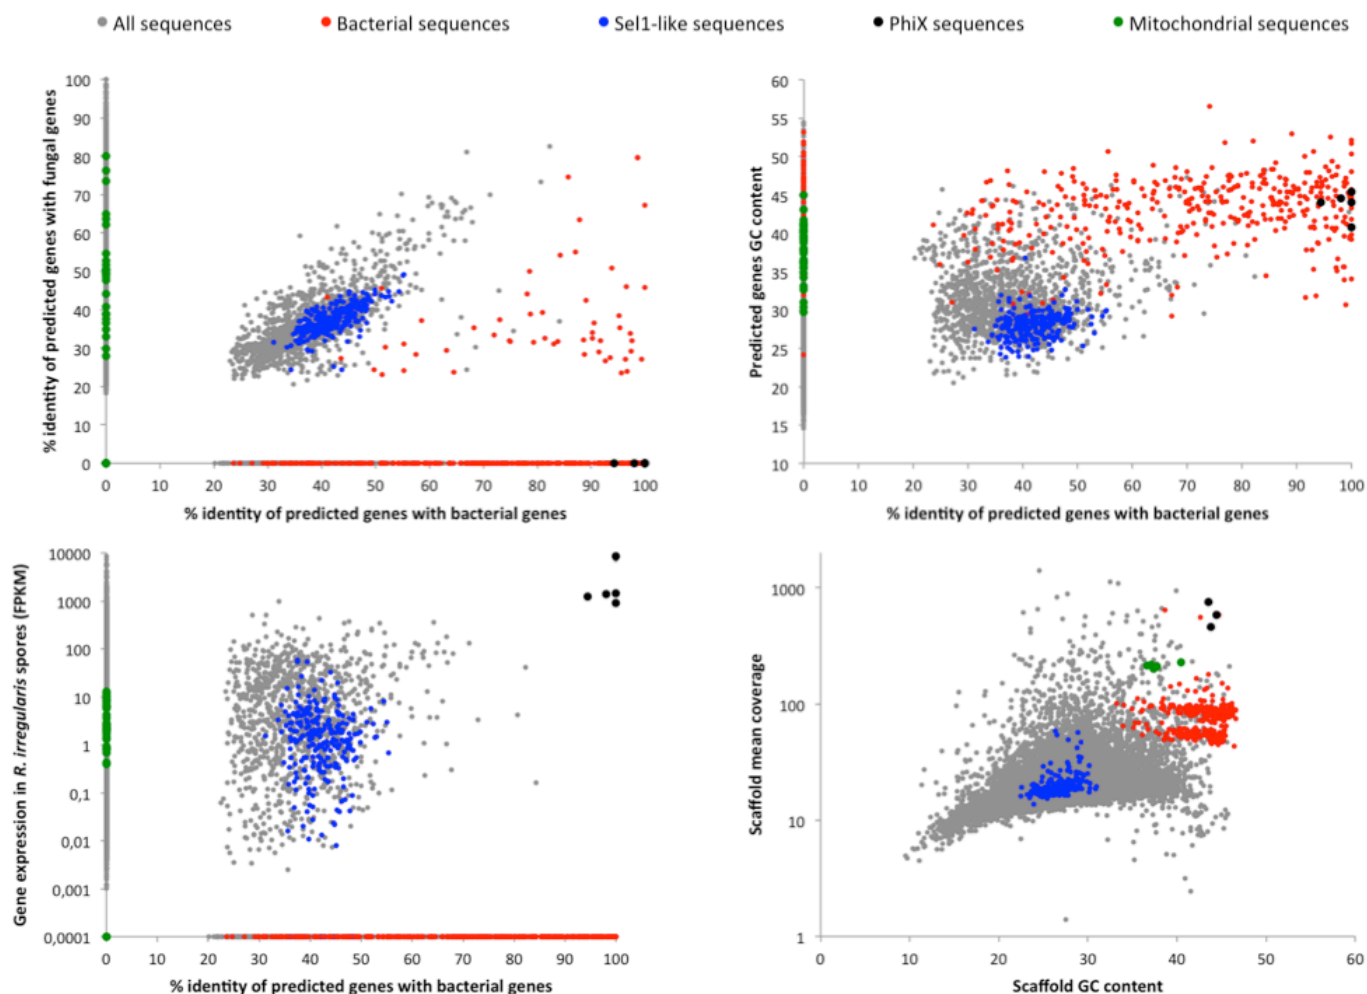

## References

1. Stockinger H, Walker C, Schüssler A. (2009) Glomus intraradices DAOM197198, a model fungus in arbuscular mycorrhiza research, is not Glomus intraradices. *New Phytol.* 183:1176–87
2. Chabot S, Bécard G, Piché Y. (1992) The life cycle of Glomus intraradices in root organ culture. *Mycologia* 84: 315-321
3. Bécard G and Fortin JA (1988) Early events of vesicular-arbuscularmycorrhiza formation on Ri T-DNA transformed roots. *New Phytol.* 108:211-218
4. Koch et al. (2004) High genetic variability and low local diversity in arbuscular mycorrhizal fungal population. *Proc Natl Acad Sci USA* 101:2369–2374
5. Giovanetti M and Mosse B (1980) An evaluation of techniques for measuring vesicular arbuscular mycorrhizal infection in roots. *New Phytol.* 84:489-500
6. Hewitt EJ (1966) Sand and water culture methods used in the study of plant nutrition. *Commonwealth Bureau of Horticulture and Plantation Crops, East Malling, Technical Communication* 22:547
7. Saghai-Marooof MA, Soliman KM, Jorgensen RA, Allard RW (1984) Ribosomal DNA spacer-length polymorphisms in barley: mendelian inheritance, chromosomal location, and population dynamics. *Proc Natl Acad Sci USA* 81:8014–8018
8. Lassman T, Hayashizaki Y, Daib CO (2009) TagDust—a program to eliminate artifacts from next generation sequencing data. *Bioinformatics* 25:2839-40
9. Li H and Durbin R (2010) Fast and accurate long-read alignment with Burrows-Wheeler Transform. *Bioinformatics* 26:589-95
10. Li H et al. (2009) The Sequence alignment/map (SAM) format and SAMtools. *Bioinformatics* 25:2078-9.
11. Yu J, et al. (2005) The genomes of *Oryza sativa*: a history of duplications. *PLoS Biol* 3:e38.
12. Price AL, Jones NC and Pevzner PA (2005) De novo identification of repeat families in large genomes. *Bioinformatics* 21:i351-8
13. UniProt Consortium (2007) The universal protein resource (UniProt). *Nucleic Acids Res.* 36:D190-5
14. Altschul SF, Gish W, Miller W, Myers EW and Lipman DJ (1990) Basic local alignment search tool. *J. Mol. Biol.* 215:403–410
15. Jurka J et al. (2005) Repbase Update, a database of eukaryotic repetitive elements. *Cytogenet. Genome Res.* 110:462–467
16. Mc Carthy E and Mc Donald JF (2003) LTR\_STRUC: a novel search and identification program for LTR retrotransposons. *Bioinformatics* 19:362-7
17. Smit AFA, Hubley R and Green P (1996-2010) RepeatMasker Open-3.0. <http://www.repeatmasker.org>
18. Murat C et al. (2011) Distribution and localization of microsatellites in the Perigord black truffle genome and identification of new molecular markers. *Fungal Genet Biol.* 48:592–601
19. Murat C, Payen T, Petitpierre D, Labbé J (2013) in *The Ecological Genomics of Fungi*, ed. Martin F (Wiley-Blackwell)
20. Riley DE, Krieger JN (2009) UTR dinucleotide simple sequence repeat evolution exhibits recurring patterns including regulatory sequence motif replacements. *Gene* 429:80–86
21. Benson G (1999) Tandem repeats finder: a program to analyze DNA sequences. *Nucleic Acids Res.* 27:573-580
22. Salamov AA and Solovyev VV (2000) Ab initio Gene Finding in Drosophila Genomic DNA. *Genome Res.* 10:516-522
23. Birney EM Clamp and Durbin R (2004) GeneWise and Genomewise. *Genome Res.* 14:988-995
24. Ter-Hovhannisyann V, Lomsadze A, Chernoff YO, and Borodovsky M (2008) Gene prediction in novel fungal genomes using an ab initio algorithm with unsupervised training. *Genome Res.* 18:1979-1990
25. Zdobnov EM, and Apweiler R (2001) InterProScan – an integration platform for the signature-recognition methods in InterPro. *Bioinformatics* 17:847-848
26. Bairoch A et al. (2005) The Universal Protein Resource (UniProt). *Nucleic Acids Res.* 33:154-159
27. Ogata H et al. (1999) KEGG: Kyoto Encyclopedia of Genes and Genomes. *Nucleic Acids Res.* 27:29-34
28. Bateman A (2004) The Pfam protein families database. *Nucleic Acids Res.* 32:138D-141

29. Bairoch A (2000) The ENZYME database in 2000. *Nucleic Acids Res.* 28:304-305
30. Ashburner M et al. (2000) Gene Ontology: tool for the unification of biology. *Nat Genet.* 25:25-29
31. Koonin EV et al. (2004) A comprehensive evolutionary classification of proteins encoded in complete eukaryotic genomes. *Genome Biol* 5:R7-R7
32. Nielsen H, Brunak S, and von Heijne G (1999) Machine learning approaches for the prediction of signal peptides and other protein sorting signals. *Protein Eng.* 12:3-9
33. Krogh A, Larsson B, von Heijne G, and Sonnhammer ELL (2001) Predicting transmembrane protein topology with a hidden Markov model: application to complete genomes. *J Mol Biol.* 305:567-580
34. Grigoriev IV, et al. (2011) The Genome Portal of the Department of Energy Joint Genome Institute. *Nucleic Acids Res.* 40:D26-32
35. Enright AJ, Van Dongen S, Ouzounis CA (2002) An efficient algorithm for large-scale detection of protein families. *Nucleic Acids Res.* 30:1575-1584
36. De Bie T, Cristianini N, Demuth JP and Hahn MW (2006) CAFE: a computational tool for the study of gene family evolution. *Bioinformatics* 22:1269-1271
37. Eddy SR (2009) A New Generation of Homology Search Tools Based on Probabilistic Inference. *Genome Inform.* 23:205-211
38. Finn RD et al. (2010) The Pfam protein families database. *Nucleic Acids Res.* 38:D211-222
39. Petersen TN, Brunak S, von Heijne G, Nielsen H (2011) SignalP 4.0: discriminating signal peptides from transmembrane regions. *Nat Methods* 8:785-786
40. Horton P et al. (2007) WoLF PSORT: Protein Localization Predictor. *Nucleic Acids Res.* 35:W585-7
41. Emanuelsson O et al. (2007) Locating proteins in the cell using TargetP, SignalP and related tools. *Nat. Protoc.* 2:953-971
42. Nielsen H, Engelbrecht J, Brunak S and von Heijne G (1997) Identification of prokaryotic and eukaryotic signal peptides and prediction of their cleavage sites. *Protein Eng.* 10:1-6
43. Rawlings ND, Barrett AJ, Bateman A (2012) MEROPS: the database of proteolytic enzymes, their substrates and inhibitors. *Nucleic Acids Res.* 40:D343-D350.
44. Khaldi N et al. (2010) SMURF: genomic mapping of fungal secondary metabolite clusters. *Fungal Genet. Biol.* 47:736-741
45. Miranda-Saavedra D and Barton GJ (2007) Classification and functional annotation of eukaryotic protein kinases. *Proteins* 68:893-914.
46. Cantarel BL et al. (2009) The Carbohydrate-Active EnZymes database(CAZy): an expert resource for glycogenomics. *Nucleic Acids Res.* 37:D233-D238
47. De Caceres M, Oliva F, Font X, Vives S (2007) Ginkgo, a program for non-standard multivariate fuzzy analysis. *Advances in Fuzzy Sets and Systems* 2:41-56
48. Lang D, Weiche B, Timmerhaus G, Richardt S, Riano-Pachon DM, Correa LGG, Reski R, Mueller-Roeber B, Rensing SA (2010). Genome-wide phylogenetic comparative analysis of plant transcriptional regulation: a timeline of loss, gain, expansion and correlation with complexity. *Genome Biol Evol* 2:488-503.
49. Krzywinski M et al. (2009) Circos: an information aesthetic for comparative genomics. *Genome Res.* 19:1639-1645
50. Robinson JT et al. (2011) Integrative Genomics Viewer. *Nat Biotechnol.* 29:24-26
51. Letunic I and Bork P (2011) Interactive Tree Of Life v2: online annotation and display of phylogenetic trees made easy. *Nucleic Acids Res.* 39:W475-8
52. Trapnell C, Pachter L, Salzberg SL (2009) TopHat: discovering splice junctions with RNA-Seq. *Bioinformatics* 25:1105-1111
53. Trapnell C et al. (2010) Transcript assembly and quantification by RNA-Seq reveals unannotated transcripts and isoform switching during cell differentiation. *Nat Biotechnol.* 28:511-515
54. Trapnell C et al. (2013) Differential analysis of gene regulation at transcript resolution with RNA-seq. *Nat Biotechnol.* 31:46-53
55. Rensing SA et al. (2007). An ancient genome duplication contributed to the abundance of metabolic genes in the moss *Physcomitrella patens*. *BMC Evol Biol* 7:130
56. Lynch M and Conery JS (2000). The evolutionary fate and consequences of duplicate genes. *Science* 290:1151-1155
57. McLachlan G et al. (1999) The EMMIX Algorithm for the Fitting of Normal and t-Components. *J Stat Softw* 4:2
58. Jiao Y et al. (2011). Ancestral polyploidy in seed plants and angiosperms. *Nature* 473:97-100

59. Falcon S, Gentleman R (2007) Using GOSTats to test gene lists for GO term association. *Bioinformatics* 23:257-258.
60. Benjamini Y, Hochberg Y (1995) Controlling the False Discovery Rate - a Practical and Powerful Approach to Multiple Testing. *J R Stat Soc Series B Stat Methodol.* 57:289-300.
61. Spanu P, et al. (2010) Genome expansion and gene loss in powdery mildew fungi reveal tradeoffs in extreme parasitism. *Science* 330:1543-1546.
62. Hogenkamp C, Arndt D, Pereira PA, Becker JD, Hohnjec N, Küster H (2011) Laser microdissection unravels cell-type-specific transcription in arbuscular mycorrhizal roots, including CAAT-Box transcription factor gene expression correlating with fungal contact and spread. *Plant Physiology* 157:2023-2043.
